# Supplementary material
Source: publisher figshare collection journal article supplement (https://acs.figshare.com/ndownloader/files/5984964)
Supplement: Supplementary file 1 [file 5984964]

 
data_Re-complex5
 
_audit_creation_method            'SHELXL-2014/7'
_shelx_SHELXL_version_number      '2014/7'
_chemical_name_systematic         ?
_chemical_name_common             ?
_chemical_melting_point           ?
_chemical_formula_moiety          ?
_chemical_formula_sum
 'C32 H27 Cl N3 O6 Re' 
_chemical_formula_weight          771.21

loop_
 _atom_type_symbol
 _atom_type_description
 _atom_type_scat_dispersion_real
 _atom_type_scat_dispersion_imag
 _atom_type_scat_source
 'C'  'C'   0.0033   0.0016
 'International Tables Vol C Tables 4.2.6.8 and 6.1.1.4'
 'H'  'H'   0.0000   0.0000
 'International Tables Vol C Tables 4.2.6.8 and 6.1.1.4'
 'Cl'  'Cl'   0.1484   0.1585
 'International Tables Vol C Tables 4.2.6.8 and 6.1.1.4'
 'N'  'N'   0.0061   0.0033
 'International Tables Vol C Tables 4.2.6.8 and 6.1.1.4'
 'O'  'O'   0.0106   0.0060
 'International Tables Vol C Tables 4.2.6.8 and 6.1.1.4'
 'Re'  'Re'  -1.0185   7.2310
 'International Tables Vol C Tables 4.2.6.8 and 6.1.1.4'
 
_space_group_crystal_system       triclinic
_space_group_IT_number            2
_space_group_name_H-M_alt         'P -1'
_space_group_name_Hall            '-P 1'
 
_shelx_space_group_comment
;
The symmetry employed for this shelxl refinement is uniquely defined
by the following loop, which should always be used as a source of
symmetry information in preference to the above space-group names.
They are only intended as comments.
;
 
loop_
 _space_group_symop_operation_xyz
 'x, y, z'
 '-x, -y, -z'
 
_cell_length_a                    9.4340(2)
_cell_length_b                    10.4154(3)
_cell_length_c                    16.3142(5)
_cell_angle_alpha                 92.057(3)
_cell_angle_beta                  96.839(2)
_cell_angle_gamma                 101.301(2)
_cell_volume                      1557.86(7)
_cell_formula_units_Z             2
_cell_measurement_temperature     173(2)
_cell_measurement_reflns_used     12878
_cell_measurement_theta_min       3.119
_cell_measurement_theta_max       25.000
 
_exptl_crystal_description        needle
_exptl_crystal_colour             colorless
_exptl_crystal_density_meas       ?
_exptl_crystal_density_method     ?
_exptl_crystal_density_diffrn     1.644          
_exptl_crystal_F_000              760
_exptl_transmission_factor_min    ?
_exptl_transmission_factor_max    ?
_exptl_crystal_size_max           0.200
_exptl_crystal_size_mid           0.100
_exptl_crystal_size_min           0.100
_exptl_absorpt_coefficient_mu     4.033
_shelx_estimated_absorpt_T_min    0.499
_shelx_estimated_absorpt_T_max    0.689
_exptl_absorpt_correction_type    ?
_exptl_absorpt_correction_T_min   ?
_exptl_absorpt_correction_T_max   ?
_exptl_absorpt_process_details    ?
_exptl_absorpt_special_details    ?
_diffrn_ambient_temperature       173(2)
_diffrn_radiation_wavelength      0.71073
_diffrn_radiation_type            MoK\a
_diffrn_source                    ?
_diffrn_measurement_device_type   'Oxford Xcalibur 2'
_diffrn_measurement_method        ?
_diffrn_detector_area_resol_mean  ?
_diffrn_reflns_number             12878
_diffrn_reflns_av_unetI/netI      0.0408
_diffrn_reflns_av_R_equivalents   0.0319
_diffrn_reflns_limit_h_min        -7
_diffrn_reflns_limit_h_max        11
_diffrn_reflns_limit_k_min        -12
_diffrn_reflns_limit_k_max        11
_diffrn_reflns_limit_l_min        -19
_diffrn_reflns_limit_l_max        18
_diffrn_reflns_theta_min          3.119
_diffrn_reflns_theta_max          25.000
_diffrn_reflns_theta_full         25.000
_diffrn_measured_fraction_theta_max   0.996
_diffrn_measured_fraction_theta_full  0.996
_diffrn_reflns_Laue_measured_fraction_max    0.996
_diffrn_reflns_Laue_measured_fraction_full   0.996
_diffrn_reflns_point_group_measured_fraction_max   0.996
_diffrn_reflns_point_group_measured_fraction_full  0.996
_reflns_number_total              5469
_reflns_number_gt                 4798
_reflns_threshold_expression      'I > 2\s(I)'
_reflns_Friedel_coverage          0.000
_reflns_Friedel_fraction_max      .
_reflns_Friedel_fraction_full     .
 
_reflns_special_details
;
 Reflections were merged by SHELXL according to the crystal
 class for the calculation of statistics and refinement.
 
 _reflns_Friedel_fraction is defined as the number of unique
 Friedel pairs measured divided by the number that would be
 possible theoretically, ignoring centric projections and
 systematic absences.
;
 
_computing_data_collection        ?
_computing_cell_refinement        ?
_computing_data_reduction         ?
_computing_structure_solution     ?
_computing_structure_refinement 'SHELXL-2014/7 (Sheldrick, 2014)'
_computing_molecular_graphics     ?
_computing_publication_material   ?
_refine_special_details           ?
_refine_ls_structure_factor_coef  Fsqd
_refine_ls_matrix_type            full
_refine_ls_weighting_scheme       calc
_refine_ls_weighting_details
'w=1/[\s^2^(Fo^2^)+(0.0334P)^2^] where P=(Fo^2^+2Fc^2^)/3'
_atom_sites_solution_primary      ?
_atom_sites_solution_secondary    ?
_atom_sites_solution_hydrogens    geom
_refine_ls_hydrogen_treatment     constr
_refine_ls_extinction_method      none
_refine_ls_extinction_coef        .
_refine_ls_number_reflns          5469
_refine_ls_number_parameters      391
_refine_ls_number_restraints      0
_refine_ls_R_factor_all           0.0356
_refine_ls_R_factor_gt            0.0272
_refine_ls_wR_factor_ref          0.0623
_refine_ls_wR_factor_gt           0.0598
_refine_ls_goodness_of_fit_ref    1.015
_refine_ls_restrained_S_all       1.015
_refine_ls_shift/su_max           0.001
_refine_ls_shift/su_mean          0.000
 
loop_
 _atom_site_label
 _atom_site_type_symbol
 _atom_site_fract_x
 _atom_site_fract_y
 _atom_site_fract_z
 _atom_site_U_iso_or_equiv
 _atom_site_adp_type
 _atom_site_occupancy
 _atom_site_site_symmetry_order  
 _atom_site_calc_flag
 _atom_site_refinement_flags_posn
 _atom_site_refinement_flags_adp
 _atom_site_refinement_flags_occupancy
 _atom_site_disorder_assembly
 _atom_site_disorder_group
Re1 Re 0.10030(2) 0.08072(2) 0.34793(2) 0.02970(7) Uani 1 1 d . . . . .
O4 O -0.6089(3) 0.3353(4) -0.0440(2) 0.0569(9) Uani 1 1 d . . . . .
H04 H -0.6753 0.3293 -0.0839 0.085 Uiso 1 1 calc R U . . .
O5 O -0.7426(4) 0.1468(4) -0.0114(3) 0.0789(13) Uani 1 1 d . . . . .
O3 O 0.2599(3) -0.0256(4) 0.49802(19) 0.0511(8) Uani 1 1 d . . . . .
O1 O -0.0049(4) 0.2678(4) 0.4671(2) 0.0596(10) Uani 1 1 d . . . . .
O2 O -0.1441(3) -0.1479(3) 0.3783(2) 0.0489(8) Uani 1 1 d . . . . .
N1 N -0.0219(3) 0.1324(3) 0.2317(2) 0.0331(8) Uani 1 1 d . . . . .
N2 N 0.2602(3) 0.2451(3) 0.3080(2) 0.0320(8) Uani 1 1 d . . . . .
N3 N 0.1681(3) -0.0336(3) 0.2468(2) 0.0312(8) Uani 1 1 d . . . . .
C5 C -0.4984(4) 0.2132(4) 0.0544(3) 0.0361(10) Uani 1 1 d . . . . .
C10 C -0.3795(4) 0.3154(5) 0.0740(3) 0.0397(10) Uani 1 1 d . . . . .
H10 H -0.3743 0.3943 0.0460 0.048 Uiso 1 1 calc R U . . .
C8 C -0.2709(4) 0.1882(4) 0.1754(3) 0.0351(10) Uani 1 1 d . . . . .
C9 C -0.2668(4) 0.3021(4) 0.1352(3) 0.0388(10) Uani 1 1 d . . . . .
H9 H -0.1862 0.3730 0.1490 0.047 Uiso 1 1 calc R U . . .
C7 C -0.3876(5) 0.0847(5) 0.1532(3) 0.0514(13) Uani 1 1 d . . . . .
H7 H -0.3903 0.0042 0.1791 0.062 Uiso 1 1 calc R U . . .
C6 C -0.5006(5) 0.0977(5) 0.0934(3) 0.0517(13) Uani 1 1 d . . . . .
H6 H -0.5805 0.0261 0.0792 0.062 Uiso 1 1 calc R U . . .
C4 C -0.6285(5) 0.2257(5) -0.0037(3) 0.0445(11) Uani 1 1 d . . . . .
C11 C -0.1594(4) 0.1775(5) 0.2493(3) 0.0380(10) Uani 1 1 d . . . . .
H11A H -0.1300 0.2646 0.2795 0.046 Uiso 1 1 calc R U . . .
H11B H -0.2084 0.1161 0.2869 0.046 Uiso 1 1 calc R U . . .
C12 C 0.0732(4) 0.2340(5) 0.1892(3) 0.0422(11) Uani 1 1 d . . . . .
H12A H 0.0248 0.3097 0.1815 0.051 Uiso 1 1 calc R U . . .
H12B H 0.0810 0.1970 0.1335 0.051 Uiso 1 1 calc R U . . .
C13 C 0.2239(4) 0.2830(4) 0.2331(2) 0.0318(9) Uani 1 1 d . . . . .
C14 C 0.3194(5) 0.3718(5) 0.1913(3) 0.0411(11) Uani 1 1 d . . . . .
H14 H 0.2877 0.3964 0.1377 0.049 Uiso 1 1 calc R U . . .
C15 C 0.4564(5) 0.4216(5) 0.2283(3) 0.0441(11) Uani 1 1 d . . . . .
H15 H 0.5230 0.4783 0.1998 0.053 Uiso 1 1 calc R U . . .
C16 C 0.4997(5) 0.3889(5) 0.3095(3) 0.0432(11) Uani 1 1 d . . . . .
C21 C 0.3987(4) 0.3027(4) 0.3500(3) 0.0390(10) Uani 1 1 d . . . . .
C17 C 0.6399(5) 0.4420(6) 0.3525(4) 0.0626(15) Uani 1 1 d . . . . .
H17 H 0.7086 0.4994 0.3258 0.075 Uiso 1 1 calc R U . . .
C18 C 0.6770(6) 0.4119(7) 0.4314(4) 0.083(2) Uani 1 1 d . . . . .
H18 H 0.7725 0.4453 0.4588 0.099 Uiso 1 1 calc R U . . .
C19 C 0.5744(6) 0.3315(7) 0.4724(4) 0.087(2) Uani 1 1 d . . . . .
H19 H 0.5994 0.3138 0.5284 0.104 Uiso 1 1 calc R U . . .
C20 C 0.4388(5) 0.2784(6) 0.4326(3) 0.0617(15) Uani 1 1 d . . . . .
H20 H 0.3705 0.2241 0.4613 0.074 Uiso 1 1 calc R U . . .
C22 C -0.0591(4) 0.0066(4) 0.1787(3) 0.0369(10) Uani 1 1 d . . . . .
H22A H -0.1373 -0.0553 0.2006 0.044 Uiso 1 1 calc R U . . .
H22B H -0.0956 0.0242 0.1216 0.044 Uiso 1 1 calc R U . . .
C23 C 0.0720(4) -0.0536(4) 0.1776(3) 0.0356(10) Uani 1 1 d . . . . .
C24 C 0.0882(5) -0.1313(5) 0.1089(3) 0.0454(12) Uani 1 1 d . . . . .
H24 H 0.0208 -0.1391 0.0600 0.054 Uiso 1 1 calc R U . . .
C25 C 0.2007(5) -0.1955(5) 0.1127(3) 0.0495(13) Uani 1 1 d . . . . .
H25 H 0.2103 -0.2507 0.0669 0.059 Uiso 1 1 calc R U . . .
C26 C 0.3038(4) -0.1802(4) 0.1847(3) 0.0395(10) Uani 1 1 d . . . . .
C31 C 0.2885(4) -0.0932(4) 0.2506(3) 0.0349(10) Uani 1 1 d . . . . .
C27 C 0.4226(5) -0.2455(5) 0.1931(3) 0.0520(13) Uani 1 1 d . . . . .
H27 H 0.4324 -0.3057 0.1500 0.062 Uiso 1 1 calc R U . . .
C28 C 0.5226(5) -0.2235(5) 0.2617(3) 0.0530(13) Uani 1 1 d . . . . .
H28 H 0.6000 -0.2701 0.2670 0.064 Uiso 1 1 calc R U . . .
C29 C 0.5120(5) -0.1325(5) 0.3244(3) 0.0482(12) Uani 1 1 d . . . . .
H29 H 0.5841 -0.1158 0.3714 0.058 Uiso 1 1 calc R U . . .
C30 C 0.3986(4) -0.0666(5) 0.3190(3) 0.0424(11) Uani 1 1 d . . . . .
H30 H 0.3944 -0.0031 0.3614 0.051 Uiso 1 1 calc R U . . .
C3 C 0.2041(4) 0.0177(4) 0.4422(3) 0.0371(10) Uani 1 1 d . . . . .
C1 C 0.0330(4) 0.1962(4) 0.4241(3) 0.0366(10) Uani 1 1 d . . . . .
C2 C -0.0530(4) -0.0635(4) 0.3664(2) 0.0327(9) Uani 1 1 d . . . . .
Cl1 Cl 0.82962(12) 0.65041(12) 0.18619(7) 0.0501(3) Uani 1 1 d . . . . .
O6 O 0.0374(6) 0.4985(5) 0.2823(4) 0.133(2) Uani 1 1 d . . . . .
H06 H -0.0135 0.5455 0.2567 0.199 Uiso 1 1 calc R U . . .
C32 C 0.1287(7) 0.5719(6) 0.3442(4) 0.090(2) Uani 1 1 d . . . . .
H32A H 0.2083 0.6283 0.3212 0.135 Uiso 1 1 calc R U . . .
H32B H 0.1689 0.5143 0.3828 0.135 Uiso 1 1 calc R U . . .
H32C H 0.0750 0.6265 0.3736 0.135 Uiso 1 1 calc R U . . .
 
loop_
 _atom_site_aniso_label
 _atom_site_aniso_U_11
 _atom_site_aniso_U_22
 _atom_site_aniso_U_33
 _atom_site_aniso_U_23
 _atom_site_aniso_U_13
 _atom_site_aniso_U_12
Re1 0.02485(10) 0.03691(11) 0.02612(9) 0.00099(7) 0.00014(6) 0.00533(7)
O4 0.045(2) 0.066(2) 0.055(2) 0.0169(19) -0.0124(15) 0.0065(16)
O5 0.051(2) 0.075(3) 0.090(3) 0.028(2) -0.035(2) -0.013(2)
O3 0.0461(19) 0.071(2) 0.0396(18) 0.0162(17) -0.0016(14) 0.0208(17)
O1 0.075(3) 0.064(2) 0.047(2) -0.0094(18) 0.0104(17) 0.033(2)
O2 0.0340(18) 0.055(2) 0.053(2) 0.0071(17) 0.0070(14) -0.0035(16)
N1 0.0287(18) 0.038(2) 0.0309(18) 0.0025(15) -0.0030(14) 0.0058(15)
N2 0.0269(18) 0.034(2) 0.0334(19) -0.0001(15) 0.0007(14) 0.0042(14)
N3 0.0226(17) 0.036(2) 0.0338(19) -0.0019(15) 0.0027(14) 0.0052(14)
C5 0.030(2) 0.043(3) 0.033(2) -0.001(2) -0.0027(17) 0.0058(19)
C10 0.040(3) 0.040(3) 0.039(2) 0.004(2) -0.0003(19) 0.010(2)
C8 0.031(2) 0.039(3) 0.034(2) -0.0005(19) -0.0014(17) 0.0088(18)
C9 0.030(2) 0.038(3) 0.044(3) -0.001(2) -0.0070(18) 0.0039(18)
C7 0.042(3) 0.042(3) 0.064(3) 0.021(2) -0.009(2) 0.002(2)
C6 0.036(3) 0.049(3) 0.060(3) 0.008(3) -0.012(2) -0.004(2)
C4 0.043(3) 0.050(3) 0.037(2) 0.003(2) -0.005(2) 0.007(2)
C11 0.035(2) 0.047(3) 0.034(2) 0.000(2) -0.0010(18) 0.014(2)
C12 0.038(3) 0.045(3) 0.039(2) 0.012(2) -0.0031(19) 0.000(2)
C13 0.031(2) 0.032(2) 0.032(2) -0.0018(18) 0.0032(17) 0.0091(17)
C14 0.041(3) 0.046(3) 0.037(2) 0.007(2) 0.0089(19) 0.010(2)
C15 0.036(3) 0.045(3) 0.052(3) 0.005(2) 0.017(2) 0.003(2)
C16 0.030(2) 0.041(3) 0.057(3) 0.001(2) 0.005(2) 0.0057(19)
C21 0.034(2) 0.038(3) 0.041(2) 0.002(2) -0.0022(18) 0.0028(19)
C17 0.032(3) 0.068(4) 0.080(4) 0.010(3) 0.001(2) -0.006(2)
C18 0.046(3) 0.092(5) 0.088(5) 0.017(4) -0.025(3) -0.021(3)
C19 0.063(4) 0.104(5) 0.068(4) 0.024(4) -0.033(3) -0.022(3)
C20 0.050(3) 0.070(4) 0.050(3) 0.012(3) -0.013(2) -0.014(3)
C22 0.034(2) 0.041(3) 0.032(2) -0.0021(19) -0.0054(17) 0.0055(19)
C23 0.033(2) 0.038(3) 0.033(2) -0.0001(19) -0.0007(17) 0.0030(18)
C24 0.035(3) 0.057(3) 0.038(3) -0.014(2) -0.0009(19) 0.002(2)
C25 0.042(3) 0.051(3) 0.051(3) -0.022(2) 0.013(2) -0.001(2)
C26 0.031(2) 0.037(3) 0.049(3) -0.003(2) 0.0121(19) 0.0013(19)
C31 0.031(2) 0.035(2) 0.037(2) 0.0015(19) 0.0088(18) 0.0020(18)
C27 0.046(3) 0.038(3) 0.072(4) -0.008(3) 0.016(3) 0.008(2)
C28 0.037(3) 0.051(3) 0.076(4) 0.006(3) 0.012(2) 0.018(2)
C29 0.030(2) 0.065(3) 0.050(3) 0.007(3) 0.005(2) 0.011(2)
C30 0.027(2) 0.057(3) 0.044(3) 0.000(2) 0.0069(19) 0.011(2)
C3 0.033(2) 0.042(3) 0.038(2) 0.000(2) 0.0067(19) 0.0096(19)
C1 0.035(2) 0.040(3) 0.033(2) 0.004(2) -0.0026(18) 0.0080(19)
C2 0.033(2) 0.042(3) 0.026(2) 0.0016(18) 0.0001(17) 0.016(2)
Cl1 0.0474(7) 0.0489(7) 0.0506(7) 0.0103(6) -0.0079(5) 0.0083(5)
O6 0.126(4) 0.081(4) 0.173(6) -0.042(4) -0.092(4) 0.052(3)
C32 0.090(5) 0.077(5) 0.090(5) -0.004(4) -0.024(4) 0.007(4)
 
_geom_special_details
;
 All esds (except the esd in the dihedral angle between two l.s. planes)
 are estimated using the full covariance matrix.  The cell esds are taken
 into account individually in the estimation of esds in distances, angles
 and torsion angles; correlations between esds in cell parameters are only
 used when they are defined by crystal symmetry.  An approximate (isotropic)
 treatment of cell esds is used for estimating esds involving l.s. planes.
;
 
loop_
 _geom_bond_atom_site_label_1
 _geom_bond_atom_site_label_2
 _geom_bond_distance
 _geom_bond_site_symmetry_2
 _geom_bond_publ_flag
Re1 C3 1.928(4) . ?
Re1 C2 1.930(5) . ?
Re1 C1 1.943(5) . ?
Re1 N2 2.221(3) . ?
Re1 N3 2.226(3) . ?
Re1 N1 2.239(3) . ?
O4 C4 1.330(6) . ?
O4 H04 0.8400 . ?
O5 C4 1.209(5) . ?
O3 C3 1.149(5) . ?
O1 C1 1.140(5) . ?
O2 C2 1.142(5) . ?
N1 C12 1.495(5) . ?
N1 C22 1.500(5) . ?
N1 C11 1.517(5) . ?
N2 C13 1.325(5) . ?
N2 C21 1.409(5) . ?
N3 C23 1.344(5) . ?
N3 C31 1.393(5) . ?
C5 C6 1.379(6) . ?
C5 C10 1.384(6) . ?
C5 C4 1.489(6) . ?
C10 C9 1.400(6) . ?
C10 H10 0.9500 . ?
C8 C9 1.372(6) . ?
C8 C7 1.385(6) . ?
C8 C11 1.524(5) . ?
C9 H9 0.9500 . ?
C7 C6 1.387(6) . ?
C7 H7 0.9500 . ?
C6 H6 0.9500 . ?
C11 H11A 0.9900 . ?
C11 H11B 0.9900 . ?
C12 C13 1.497(5) . ?
C12 H12A 0.9900 . ?
C12 H12B 0.9900 . ?
C13 C14 1.413(6) . ?
C14 C15 1.354(6) . ?
C14 H14 0.9500 . ?
C15 C16 1.412(7) . ?
C15 H15 0.9500 . ?
C16 C21 1.417(6) . ?
C16 C17 1.418(6) . ?
C21 C20 1.401(6) . ?
C17 C18 1.358(8) . ?
C17 H17 0.9500 . ?
C18 C19 1.400(8) . ?
C18 H18 0.9500 . ?
C19 C20 1.366(7) . ?
C19 H19 0.9500 . ?
C20 H20 0.9500 . ?
C22 C23 1.494(6) . ?
C22 H22A 0.9900 . ?
C22 H22B 0.9900 . ?
C23 C24 1.400(6) . ?
C24 C25 1.357(6) . ?
C24 H24 0.9500 . ?
C25 C26 1.417(6) . ?
C25 H25 0.9500 . ?
C26 C27 1.416(6) . ?
C26 C31 1.420(6) . ?
C31 C30 1.410(6) . ?
C27 C28 1.356(7) . ?
C27 H27 0.9500 . ?
C28 C29 1.395(7) . ?
C28 H28 0.9500 . ?
C29 C30 1.376(6) . ?
C29 H29 0.9500 . ?
C30 H30 0.9500 . ?
O6 C32 1.351(7) . ?
O6 H06 0.8400 . ?
C32 H32A 0.9800 . ?
C32 H32B 0.9800 . ?
C32 H32C 0.9800 . ?
 
loop_
 _geom_angle_atom_site_label_1
 _geom_angle_atom_site_label_2
 _geom_angle_atom_site_label_3
 _geom_angle
 _geom_angle_site_symmetry_1
 _geom_angle_site_symmetry_3
 _geom_angle_publ_flag
C3 Re1 C2 82.98(17) . . ?
C3 Re1 C1 88.14(17) . . ?
C2 Re1 C1 91.02(17) . . ?
C3 Re1 N2 104.77(15) . . ?
C2 Re1 N2 171.67(13) . . ?
C1 Re1 N2 92.28(15) . . ?
C3 Re1 N3 99.59(15) . . ?
C2 Re1 N3 92.24(14) . . ?
C1 Re1 N3 171.93(14) . . ?
N2 Re1 N3 83.52(12) . . ?
C3 Re1 N1 173.77(15) . . ?
C2 Re1 N1 93.89(14) . . ?
C1 Re1 N1 97.32(15) . . ?
N2 Re1 N1 78.11(12) . . ?
N3 Re1 N1 75.09(12) . . ?
C4 O4 H04 109.5 . . ?
C12 N1 C22 109.1(3) . . ?
C12 N1 C11 111.1(3) . . ?
C22 N1 C11 110.7(3) . . ?
C12 N1 Re1 110.8(2) . . ?
C22 N1 Re1 103.9(2) . . ?
C11 N1 Re1 111.0(2) . . ?
C13 N2 C21 117.9(3) . . ?
C13 N2 Re1 114.7(3) . . ?
C21 N2 Re1 127.1(3) . . ?
C23 N3 C31 118.7(3) . . ?
C23 N3 Re1 113.5(3) . . ?
C31 N3 Re1 127.6(3) . . ?
C6 C5 C10 119.0(4) . . ?
C6 C5 C4 118.4(4) . . ?
C10 C5 C4 122.5(4) . . ?
C5 C10 C9 119.8(4) . . ?
C5 C10 H10 120.1 . . ?
C9 C10 H10 120.1 . . ?
C9 C8 C7 118.7(4) . . ?
C9 C8 C11 121.9(4) . . ?
C7 C8 C11 119.2(4) . . ?
C8 C9 C10 121.1(4) . . ?
C8 C9 H9 119.4 . . ?
C10 C9 H9 119.4 . . ?
C8 C7 C6 120.6(4) . . ?
C8 C7 H7 119.7 . . ?
C6 C7 H7 119.7 . . ?
C5 C6 C7 120.8(4) . . ?
C5 C6 H6 119.6 . . ?
C7 C6 H6 119.6 . . ?
O5 C4 O4 123.2(4) . . ?
O5 C4 C5 123.5(4) . . ?
O4 C4 C5 113.2(4) . . ?
N1 C11 C8 117.4(3) . . ?
N1 C11 H11A 107.9 . . ?
C8 C11 H11A 107.9 . . ?
N1 C11 H11B 107.9 . . ?
C8 C11 H11B 107.9 . . ?
H11A C11 H11B 107.2 . . ?
N1 C12 C13 115.4(3) . . ?
N1 C12 H12A 108.4 . . ?
C13 C12 H12A 108.4 . . ?
N1 C12 H12B 108.4 . . ?
C13 C12 H12B 108.4 . . ?
H12A C12 H12B 107.5 . . ?
N2 C13 C14 123.5(4) . . ?
N2 C13 C12 119.9(4) . . ?
C14 C13 C12 116.5(4) . . ?
C15 C14 C13 119.5(4) . . ?
C15 C14 H14 120.3 . . ?
C13 C14 H14 120.3 . . ?
C14 C15 C16 119.6(4) . . ?
C14 C15 H15 120.2 . . ?
C16 C15 H15 120.2 . . ?
C15 C16 C21 118.9(4) . . ?
C15 C16 C17 122.1(4) . . ?
C21 C16 C17 118.9(5) . . ?
C20 C21 N2 121.2(4) . . ?
C20 C21 C16 118.5(4) . . ?
N2 C21 C16 120.3(4) . . ?
C18 C17 C16 120.9(5) . . ?
C18 C17 H17 119.6 . . ?
C16 C17 H17 119.6 . . ?
C17 C18 C19 120.0(5) . . ?
C17 C18 H18 120.0 . . ?
C19 C18 H18 120.0 . . ?
C20 C19 C18 120.5(5) . . ?
C20 C19 H19 119.7 . . ?
C18 C19 H19 119.7 . . ?
C19 C20 C21 121.1(5) . . ?
C19 C20 H20 119.5 . . ?
C21 C20 H20 119.5 . . ?
C23 C22 N1 110.5(3) . . ?
C23 C22 H22A 109.6 . . ?
N1 C22 H22A 109.6 . . ?
C23 C22 H22B 109.6 . . ?
N1 C22 H22B 109.6 . . ?
H22A C22 H22B 108.1 . . ?
N3 C23 C24 122.7(4) . . ?
N3 C23 C22 116.4(4) . . ?
C24 C23 C22 120.8(4) . . ?
C25 C24 C23 119.6(4) . . ?
C25 C24 H24 120.2 . . ?
C23 C24 H24 120.2 . . ?
C24 C25 C26 120.1(4) . . ?
C24 C25 H25 119.9 . . ?
C26 C25 H25 119.9 . . ?
C27 C26 C25 123.0(4) . . ?
C27 C26 C31 118.8(4) . . ?
C25 C26 C31 118.2(4) . . ?
N3 C31 C30 120.8(4) . . ?
N3 C31 C26 120.4(4) . . ?
C30 C31 C26 118.7(4) . . ?
C28 C27 C26 121.1(5) . . ?
C28 C27 H27 119.5 . . ?
C26 C27 H27 119.5 . . ?
C27 C28 C29 120.0(4) . . ?
C27 C28 H28 120.0 . . ?
C29 C28 H28 120.0 . . ?
C30 C29 C28 120.9(4) . . ?
C30 C29 H29 119.5 . . ?
C28 C29 H29 119.5 . . ?
C29 C30 C31 120.1(4) . . ?
C29 C30 H30 119.9 . . ?
C31 C30 H30 119.9 . . ?
O3 C3 Re1 176.3(4) . . ?
O1 C1 Re1 177.4(4) . . ?
O2 C2 Re1 179.1(4) . . ?
C32 O6 H06 109.5 . . ?
O6 C32 H32A 109.5 . . ?
O6 C32 H32B 109.5 . . ?
H32A C32 H32B 109.5 . . ?
O6 C32 H32C 109.5 . . ?
H32A C32 H32C 109.5 . . ?
H32B C32 H32C 109.5 . . ?
 
loop_
 _geom_torsion_atom_site_label_1
 _geom_torsion_atom_site_label_2
 _geom_torsion_atom_site_label_3
 _geom_torsion_atom_site_label_4
 _geom_torsion
 _geom_torsion_site_symmetry_1
 _geom_torsion_site_symmetry_2
 _geom_torsion_site_symmetry_3
 _geom_torsion_site_symmetry_4
 _geom_torsion_publ_flag
C6 C5 C10 C9 -2.6(7) . . . . ?
C4 C5 C10 C9 173.6(4) . . . . ?
C7 C8 C9 C10 1.4(7) . . . . ?
C11 C8 C9 C10 -172.3(4) . . . . ?
C5 C10 C9 C8 1.1(7) . . . . ?
C9 C8 C7 C6 -2.3(7) . . . . ?
C11 C8 C7 C6 171.7(5) . . . . ?
C10 C5 C6 C7 1.8(7) . . . . ?
C4 C5 C6 C7 -174.6(5) . . . . ?
C8 C7 C6 C5 0.7(8) . . . . ?
C6 C5 C4 O5 9.0(7) . . . . ?
C10 C5 C4 O5 -167.3(5) . . . . ?
C6 C5 C4 O4 -173.6(4) . . . . ?
C10 C5 C4 O4 10.1(6) . . . . ?
C12 N1 C11 C8 69.0(5) . . . . ?
C22 N1 C11 C8 -52.3(5) . . . . ?
Re1 N1 C11 C8 -167.2(3) . . . . ?
C9 C8 C11 N1 -90.3(5) . . . . ?
C7 C8 C11 N1 96.0(5) . . . . ?
C22 N1 C12 C13 -116.1(4) . . . . ?
C11 N1 C12 C13 121.6(4) . . . . ?
Re1 N1 C12 C13 -2.3(5) . . . . ?
C21 N2 C13 C14 3.9(6) . . . . ?
Re1 N2 C13 C14 -170.3(3) . . . . ?
C21 N2 C13 C12 -174.4(4) . . . . ?
Re1 N2 C13 C12 11.4(5) . . . . ?
N1 C12 C13 N2 -6.2(6) . . . . ?
N1 C12 C13 C14 175.4(4) . . . . ?
N2 C13 C14 C15 0.5(7) . . . . ?
C12 C13 C14 C15 178.8(4) . . . . ?
C13 C14 C15 C16 -2.9(7) . . . . ?
C14 C15 C16 C21 0.9(7) . . . . ?
C14 C15 C16 C17 -177.5(5) . . . . ?
C13 N2 C21 C20 173.0(5) . . . . ?
Re1 N2 C21 C20 -13.7(6) . . . . ?
C13 N2 C21 C16 -5.8(6) . . . . ?
Re1 N2 C21 C16 167.5(3) . . . . ?
C15 C16 C21 C20 -175.3(5) . . . . ?
C17 C16 C21 C20 3.1(7) . . . . ?
C15 C16 C21 N2 3.5(7) . . . . ?
C17 C16 C21 N2 -178.0(4) . . . . ?
C15 C16 C17 C18 178.0(6) . . . . ?
C21 C16 C17 C18 -0.4(8) . . . . ?
C16 C17 C18 C19 -2.5(11) . . . . ?
C17 C18 C19 C20 2.8(12) . . . . ?
C18 C19 C20 C21 0.0(11) . . . . ?
N2 C21 C20 C19 178.2(6) . . . . ?
C16 C21 C20 C19 -2.9(9) . . . . ?
C12 N1 C22 C23 70.6(4) . . . . ?
C11 N1 C22 C23 -166.9(3) . . . . ?
Re1 N1 C22 C23 -47.6(4) . . . . ?
C31 N3 C23 C24 -0.4(6) . . . . ?
Re1 N3 C23 C24 -175.1(3) . . . . ?
C31 N3 C23 C22 176.8(4) . . . . ?
Re1 N3 C23 C22 2.0(5) . . . . ?
N1 C22 C23 N3 32.1(5) . . . . ?
N1 C22 C23 C24 -150.7(4) . . . . ?
N3 C23 C24 C25 3.6(7) . . . . ?
C22 C23 C24 C25 -173.5(4) . . . . ?
C23 C24 C25 C26 -2.1(7) . . . . ?
C24 C25 C26 C27 179.2(5) . . . . ?
C24 C25 C26 C31 -2.2(7) . . . . ?
C23 N3 C31 C30 174.7(4) . . . . ?
Re1 N3 C31 C30 -11.4(6) . . . . ?
C23 N3 C31 C26 -4.1(6) . . . . ?
Re1 N3 C31 C26 169.8(3) . . . . ?
C27 C26 C31 N3 -175.9(4) . . . . ?
C25 C26 C31 N3 5.4(6) . . . . ?
C27 C26 C31 C30 5.2(6) . . . . ?
C25 C26 C31 C30 -173.5(4) . . . . ?
C25 C26 C27 C28 176.9(5) . . . . ?
C31 C26 C27 C28 -1.7(7) . . . . ?
C26 C27 C28 C29 -1.9(8) . . . . ?
C27 C28 C29 C30 1.8(8) . . . . ?
C28 C29 C30 C31 1.8(7) . . . . ?
N3 C31 C30 C29 175.8(4) . . . . ?
C26 C31 C30 C29 -5.3(7) . . . . ?
 
_refine_diff_density_max    1.570
_refine_diff_density_min   -0.674
_refine_diff_density_rms    0.102

_shelx_res_file
;

TITL shelx in P1                      New: P-1
CELL  0.71073    9.4340   10.4154   16.3142    92.057    96.839   101.301
ZERR        2    0.0002    0.0003    0.0005     0.003     0.002     0.002
LATT   1
SFAC  C  H Cl  N  O Re
UNIT    64   54   2   6  12   2
L.S. 50 0   10
FMAP 2
PLAN -5
ACTA 50
TEMP -100
SIZE 0.1 0.1 0.2
BOND $H
CONF
OMIT -4 50
OMIT -1 1 1
OMIT 1 0 2
OMIT 1 -1 1

WGHT    0.033400
FVAR      40.07198
RE1   6    0.100300    0.080717    0.347934    11.00000    0.02485    0.03691 =
         0.02612    0.00099    0.00014    0.00533
O4    5   -0.608861    0.335336   -0.043985    11.00000    0.04479    0.06563 =
         0.05477    0.01690   -0.01239    0.00652
AFIX 147
H04   2   -0.675321    0.329287   -0.083908    11.00000   -1.50000
AFIX   0
O5    5   -0.742550    0.146799   -0.011404    11.00000    0.05144    0.07541 =
         0.08978    0.02750   -0.03514   -0.01331
O3    5    0.259853   -0.025612    0.498016    11.00000    0.04610    0.07064 =
         0.03958    0.01624   -0.00163    0.02080
O1    5   -0.004884    0.267752    0.467053    11.00000    0.07500    0.06445 =
         0.04677   -0.00937    0.01042    0.03277
O2    5   -0.144121   -0.147858    0.378326    11.00000    0.03403    0.05544 =
         0.05264    0.00706    0.00696   -0.00347
N1    4   -0.021930    0.132375    0.231672    11.00000    0.02871    0.03768 =
         0.03087    0.00247   -0.00299    0.00580
N2    4    0.260231    0.245126    0.308019    11.00000    0.02685    0.03392 =
         0.03338   -0.00008    0.00070    0.00424
N3    4    0.168143   -0.033587    0.246839    11.00000    0.02260    0.03637 =
         0.03384   -0.00193    0.00267    0.00515
C5    1   -0.498371    0.213188    0.054367    11.00000    0.02980    0.04279 =
         0.03327   -0.00102   -0.00267    0.00576
C10   1   -0.379458    0.315383    0.073969    11.00000    0.03981    0.03971 =
         0.03935    0.00430   -0.00030    0.01019
AFIX  43
H10   2   -0.374285    0.394281    0.045992    11.00000   -1.20000
AFIX   0
C8    1   -0.270885    0.188241    0.175442    11.00000    0.03105    0.03890 =
         0.03449   -0.00051   -0.00136    0.00877
C9    1   -0.266835    0.302073    0.135165    11.00000    0.02968    0.03798 =
         0.04429   -0.00126   -0.00699    0.00390
AFIX  43
H9    2   -0.186243    0.373047    0.149044    11.00000   -1.20000
AFIX   0
C7    1   -0.387593    0.084734    0.153193    11.00000    0.04243    0.04229 =
         0.06420    0.02082   -0.00870    0.00223
AFIX  43
H7    2   -0.390277    0.004192    0.179089    11.00000   -1.20000
AFIX   0
C6    1   -0.500594    0.097667    0.093421    11.00000    0.03619    0.04908 =
         0.06047    0.00795   -0.01199   -0.00396
AFIX  43
H6    2   -0.580453    0.026129    0.079215    11.00000   -1.20000
AFIX   0
C4    1   -0.628545    0.225731   -0.003748    11.00000    0.04320    0.05037 =
         0.03657    0.00300   -0.00514    0.00739
C11   1   -0.159364    0.177529    0.249259    11.00000    0.03467    0.04657 =
         0.03380    0.00027   -0.00103    0.01411
AFIX  23
H11A  2   -0.129979    0.264631    0.279507    11.00000   -1.20000
H11B  2   -0.208443    0.116138    0.286896    11.00000   -1.20000
AFIX   0
C12   1    0.073211    0.234023    0.189181    11.00000    0.03834    0.04492 =
         0.03862    0.01157   -0.00312   -0.00005
AFIX  23
H12A  2    0.024810    0.309708    0.181509    11.00000   -1.20000
H12B  2    0.081012    0.196998    0.133537    11.00000   -1.20000
AFIX   0
C13   1    0.223850    0.283008    0.233060    11.00000    0.03127    0.03248 =
         0.03224   -0.00181    0.00315    0.00906
C14   1    0.319371    0.371808    0.191319    11.00000    0.04119    0.04637 =
         0.03747    0.00661    0.00893    0.01018
AFIX  43
H14   2    0.287720    0.396374    0.137740    11.00000   -1.20000
AFIX   0
C15   1    0.456427    0.421622    0.228314    11.00000    0.03643    0.04468 =
         0.05205    0.00457    0.01717    0.00331
AFIX  43
H15   2    0.523036    0.478265    0.199847    11.00000   -1.20000
AFIX   0
C16   1    0.499734    0.388863    0.309460    11.00000    0.03024    0.04112 =
         0.05734    0.00132    0.00523    0.00573
C21   1    0.398677    0.302706    0.349967    11.00000    0.03379    0.03819 =
         0.04125    0.00165   -0.00221    0.00281
C17   1    0.639855    0.441999    0.352536    11.00000    0.03232    0.06772 =
         0.07986    0.00989    0.00084   -0.00615
AFIX  43
H17   2    0.708630    0.499417    0.325823    11.00000   -1.20000
AFIX   0
C18   1    0.676963    0.411870    0.431443    11.00000    0.04646    0.09218 =
         0.08833    0.01670   -0.02477   -0.02061
AFIX  43
H18   2    0.772453    0.445289    0.458839    11.00000   -1.20000
AFIX   0
C19   1    0.574394    0.331499    0.472428    11.00000    0.06343    0.10410 =
         0.06768    0.02398   -0.03254   -0.02217
AFIX  43
H19   2    0.599374    0.313753    0.528436    11.00000   -1.20000
AFIX   0
C20   1    0.438763    0.278421    0.432553    11.00000    0.04959    0.07011 =
         0.05033    0.01175   -0.01346   -0.01381
AFIX  43
H20   2    0.370472    0.224143    0.461281    11.00000   -1.20000
AFIX   0
C22   1   -0.059092    0.006624    0.178729    11.00000    0.03402    0.04065 =
         0.03243   -0.00206   -0.00536    0.00550
AFIX  23
H22A  2   -0.137305   -0.055280    0.200592    11.00000   -1.20000
H22B  2   -0.095561    0.024206    0.121635    11.00000   -1.20000
AFIX   0
C23   1    0.071963   -0.053616    0.177649    11.00000    0.03290    0.03777 =
         0.03306   -0.00011   -0.00071    0.00297
C24   1    0.088178   -0.131322    0.108938    11.00000    0.03503    0.05750 =
         0.03790   -0.01371   -0.00088    0.00164
AFIX  43
H24   2    0.020824   -0.139118    0.059981    11.00000   -1.20000
AFIX   0
C25   1    0.200658   -0.195451    0.112660    11.00000    0.04164    0.05128 =
         0.05106   -0.02213    0.01272   -0.00115
AFIX  43
H25   2    0.210270   -0.250655    0.066874    11.00000   -1.20000
AFIX   0
C26   1    0.303796   -0.180226    0.184714    11.00000    0.03133    0.03688 =
         0.04918   -0.00348    0.01214    0.00129
C31   1    0.288497   -0.093189    0.250607    11.00000    0.03131    0.03542 =
         0.03699    0.00153    0.00883    0.00202
C27   1    0.422606   -0.245512    0.193110    11.00000    0.04631    0.03838 =
         0.07223   -0.00789    0.01594    0.00757
AFIX  43
H27   2    0.432385   -0.305701    0.150005    11.00000   -1.20000
AFIX   0
C28   1    0.522640   -0.223525    0.261664    11.00000    0.03741    0.05092 =
         0.07596    0.00588    0.01214    0.01830
AFIX  43
H28   2    0.599999   -0.270125    0.267002    11.00000   -1.20000
AFIX   0
C29   1    0.512015   -0.132509    0.324358    11.00000    0.03041    0.06509 =
         0.04962    0.00678    0.00459    0.01096
AFIX  43
H29   2    0.584125   -0.115788    0.371435    11.00000   -1.20000
AFIX   0
C30   1    0.398568   -0.066612    0.318976    11.00000    0.02734    0.05734 =
         0.04372   -0.00040    0.00690    0.01084
AFIX  43
H30   2    0.394406   -0.003081    0.361414    11.00000   -1.20000
AFIX   0
C3    1    0.204077    0.017724    0.442158    11.00000    0.03281    0.04182 =
         0.03781    0.00015    0.00669    0.00960
C1    1    0.032969    0.196187    0.424135    11.00000    0.03548    0.04011 =
         0.03274    0.00400   -0.00261    0.00803
C2    1   -0.053047   -0.063484    0.366447    11.00000    0.03265    0.04186 =
         0.02619    0.00162    0.00009    0.01589
CL1   3    0.829621    0.650409    0.186189    11.00000    0.04741    0.04891 =
         0.05055    0.01027   -0.00790    0.00832
O6    5    0.037412    0.498490    0.282350    11.00000    0.12554    0.08091 =
         0.17269   -0.04238   -0.09231    0.05194
AFIX 147
H06   2   -0.013517    0.545522    0.256650    11.00000   -1.50000
AFIX   0
C32   1    0.128669    0.571943    0.344237    11.00000    0.08998    0.07698 =
         0.09020   -0.00387   -0.02412    0.00723
AFIX 137
H32A  2    0.208252    0.628312    0.321169    11.00000   -1.50000
H32B  2    0.168930    0.514274    0.382796    11.00000   -1.50000
H32C  2    0.075020    0.626525    0.373637    11.00000   -1.50000

AFIX   0
HKLF 4

REM  shelx in P1                      New: P-1
REM R1 =  0.0272 for    4798 Fo > 4sig(Fo)  and  0.0356 for all    5469 data
REM    391 parameters refined using      0 restraints

END

WGHT      0.0334      0.0000

REM Highest difference peak  1.570,  deepest hole -0.674,  1-sigma level  0.102
Q1    1   0.1168  0.1762  0.3667  11.00000  0.05    1.57
Q2    1   0.0754 -0.0107  0.3263  11.00000  0.05    1.44
Q3    1  -0.7053  0.2384  0.0435  11.00000  0.05    1.19
Q4    1   0.1898  0.0664  0.3383  11.00000  0.05    0.82
Q5    1   0.0056  0.1012  0.3549  11.00000  0.05    0.67
;
_shelx_res_checksum   38537

_shelx_hkl_file
;
  -7  -7  -4  573344  127854                                                      595470   -0.37    0.00  1.0000
  -7  -7  -3   82295   85616                                                       88938   -0.31    0.00  1.0000
  -7  -7  -2 1921956  189650                                                     1895851   -0.24    0.00  1.0000
  -7  -6  -7  858203  144600                                                      828379    0.42    0.00  1.0000
  -7  -6  -6   79092   84060                                                       69514    0.45    0.00  1.0000
  -7  -6  -5 1450285  163185                                                     1490179    0.43    0.00  1.0000
  -7  -6  -4 3831265  247240                                                     3776871    0.36    0.00  1.0000
  -7  -6  -3     118   81910                                                      -65279    0.28    0.00  1.0000
  -7  -6  -2 2692104  206291                                                     2719655    0.21    0.00  1.0000
  -7  -6  -1 2505770  197712                                                     2482516    0.19    0.00  1.0000
  -7  -5  -8 1093399  148634                                                     1069436   -0.30    0.00  1.0000
  -7  -5  -7 3325468  230325                                                     3379686   -0.38    0.00  1.0000
  -7  -5  -6   85953   74901                                                       77170   -0.41    0.00  1.0000
  -7  -5  -5 1460017  152765                                                     1424911   -0.37    0.00  1.0000
  -7  -5  -4 3860447  232841                                                     3907423   -0.31    0.00  1.0000
  -7  -5  -3  607547  108112                                                      593251   -0.24    0.00  1.0000
  -7  -5  -2  309322   92258                                                      300215   -0.21    0.00  1.0000
  -7  -5  -1 3491139  211707                                                     3526962   -0.25    0.00  1.0000
  -7  -5   0 1943707  157544                                                     1908576   -0.33    0.00  1.0000
  -7  -4 -10 2624756  215049                                                     2625657   -0.01    0.00  1.0000
  -7  -4  -9 1066605  145481                                                     1076453    0.12    0.00  1.0000
  -7  -4  -8  539810  111943                                                      554449    0.25    0.00  1.0000
  -7  -4  -7 3830051  232517                                                     3776037    0.36    0.00  1.0000
  -7  -4  -6 1271866  143078                                                     1306904    0.40    0.00  1.0000
  -7  -4  -5   27292   64320                                                       22625    0.39    0.00  1.0000
  -7  -4  -4 2658476  179275                                                     2614977    0.35    0.00  1.0000
  -7  -4  -3 4336084  220775                                                     4388229    0.32    0.00  1.0000
  -7  -4  -2   50993   60870                                                       45815    0.35    0.00  1.0000
  -7  -4  -1 3932309  201231                                                     3861355    0.46    0.00  1.0000
  -7  -3 -11      41   96228                                                     -181094    0.16    0.00  1.0000
  -7  -3 -10 3168210  225901                                                     3160619    0.05    0.00  1.0000
  -7  -3  -9 2483057  191753                                                     2471624   -0.09    0.00  1.0000
  -7  -3  -8      97   71306                                                      -75772   -0.25    0.00  1.0000
  -7  -3  -7 1137858  131415                                                     1168343   -0.37    0.00  1.0000
  -7  -3  -6 2421190  168200                                                     2369613   -0.43    0.00  1.0000
  -7  -3  -5 2189368  157945                                                     2240666   -0.44    0.00  1.0000
  -7  -3  -4 1701117  140537                                                     1744166   -0.42    0.00  1.0000
  -7  -3  -3 5671157  225536                                                     5590797   -0.43    0.00  1.0000
  -7  -3  -2 1992170  138987                                                     2049822   -0.52    0.00  1.0000
  -7  -3  -1   66978   55163                                                       80881   -0.69    0.00  1.0000
  -7  -2 -12 2720949  222405                                                     2691493   -0.23    0.00  1.0000
  -7  -2 -11  242270   89192                                                      249423   -0.19    0.00  1.0000
  -7  -2 -10  519156  105458                                                      523571   -0.08    0.00  1.0000
  -7  -2  -9 4701604  250130                                                     4713063    0.07    0.00  1.0000
  -7  -2  -8  575655   98247                                                      563285    0.22    0.00  1.0000
  -7  -2  -7 1075333  119580                                                     1049343    0.32    0.00  1.0000
  -7  -2  -6 4005573  200930                                                     4061561    0.36    0.00  1.0000
  -7  -2  -5 2445734  150844                                                     2405045    0.34    0.00  1.0000
  -7  -2  -4  273681   68557                                                      286422    0.31    0.00  1.0000
  -7  -2  -3 8501423  258462                                                     8575236    0.32    0.00  1.0000
  -7  -2  -2 7362526  237847                                                     7271959    0.43    0.00  1.0000
  -7  -1 -12 2201119  200477                                                     2229502    0.25    0.00  1.0000
  -7  -1 -11 2997700  210627                                                     2968730    0.21    0.00  1.0000
  -7  -1 -10  277904   88290                                                      272570    0.13    0.00  1.0000
  -7  -1  -9 3406742  203520                                                     3408938    0.02    0.00  1.0000
  -7  -1  -8 1980917  152533                                                     1989939   -0.08    0.00  1.0000
  -7  -1  -7  113898   61082                                                      110680   -0.12    0.00  1.0000
  -7  -1  -6 3921002  184680                                                     3907271   -0.09    0.00  1.0000
  -7  -1  -5 6946558  229940                                                     6946322    0.00    0.00  1.0000
  -7  -1  -4 6412781  207511                                                     6430189    0.09    0.00  1.0000
  -7  -1  -3 5103925  181909                                                     5122322    0.10    0.00  1.0000
  -7   0 -13   15068   83964                                                       12948   -0.23    0.00  1.0000
  -7   0 -12 2069656  186833                                                     2040249   -0.26    0.00  1.0000
  -7   0 -11 3961993  242130                                                     4000617   -0.25    0.00  1.0000
  -7   0 -10  228851   80492                                                      221841   -0.19    0.00  1.0000
  -7   0  -9  560459   97449                                                      553353   -0.12    0.00  1.0000
  -7   0  -8 6271803  252566                                                     6288881   -0.09    0.00  1.0000
  -7   0  -7 3027584  168875                                                     3011420   -0.12    0.00  1.0000
  -7   0  -6  635255   79897                                                      621049   -0.23    0.00  1.0000
  -7   0  -5 7155045  220136                                                     7235799   -0.39    0.00  1.0000
  -7   0  -4 7210920  203940                                                     7101324   -0.52    0.00  1.0000
  -7   0  -3  780512   69769                                                      821170   -0.58    0.00  1.0000
  -7   1 -13  811927  138005                                                      826008    0.20    0.00  1.0000
  -7   1 -12  129286   81244                                                      135861    0.24    0.00  1.0000
  -7   1 -11 3020499  209633                                                     2989893    0.23    0.00  1.0000
  -7   1 -10 3888806  224067                                                     3917830    0.19    0.00  1.0000
  -7   1  -9      34   60579                                                      -21796    0.15    0.00  1.0000
  -7   1  -8 4533070  212466                                                     4509297    0.14    0.00  1.0000
  -7   1  -7 3782781  182414                                                     3814364    0.21    0.00  1.0000
  -7   1  -6 1995658  124728                                                     1957248    0.35    0.00  1.0000
  -7   1  -5 2435363  127660                                                     2372188    0.52    0.00  1.0000
  -7   1  -410491969  236733                                                    10663900    0.68    0.00  1.0000
  -7   1  -3 3437929  119221                                                     3331179    0.74    0.00  1.0000
  -7   2 -13 2764805  221055                                                     2748074   -0.13    0.00  1.0000
  -7   2 -12   75929   81303                                                       79016   -0.15    0.00  1.0000
  -7   2 -11 4303238  249000                                                     4323422   -0.12    0.00  1.0000
  -7   2 -10 4171137  231005                                                     4159195   -0.08    0.00  1.0000
  -7   2  -9 1967837  156897                                                     1970670   -0.03    0.00  1.0000
  -7   2  -8  499430   87730                                                      499977   -0.01    0.00  1.0000
  -7   2  -7 7791101  259719                                                     7778715   -0.06    0.00  1.0000
  -7   2  -6 4328617  183477                                                     4356295   -0.17    0.00  1.0000
  -7   2  -5 3097485  144471                                                     3142047   -0.32    0.00  1.0000
  -7   2  -4 6465645  186089                                                     6376108   -0.45    0.00  1.0000
  -7   2  -3 1596696   85529                                                     1646124   -0.51    0.00  1.0000
  -7   3 -13 2648166  222468                                                     2656015    0.06    0.00  1.0000
  -7   3 -12  886730  134551                                                      883202    0.05    0.00  1.0000
  -7   3 -11   41019   71144                                                       41042    0.00    0.00  1.0000
  -7   3 -10 3609741  219519                                                     3597934   -0.08    0.00  1.0000
  -7   3  -9 5139675  246579                                                     5168935   -0.16    0.00  1.0000
  -7   3  -8   30944   59557                                                       27922   -0.22    0.00  1.0000
  -7   3  -7 4899443  215518                                                     4860279   -0.23    0.00  1.0000
  -7   3  -6 1320711  115220                                                     1334764   -0.16    0.00  1.0000
  -7   3  -5  236606   60994                                                      238647   -0.06    0.00  1.0000
  -7   3  -4  566056   67691                                                      569084    0.05    0.00  1.0000
  -7   3  -3 9310313  211322                                                     9283561    0.11    0.00  1.0000
  -7   4 -13 1381391  170263                                                     1378886   -0.03    0.00  1.0000
  -7   4 -12 3360860  239284                                                     3360098    0.01    0.00  1.0000
  -7   4 -11  419379  108680                                                      423268    0.08    0.00  1.0000
  -7   4 -10 2427504  190252                                                     2449689    0.18    0.00  1.0000
  -7   4  -9 3172855  203198                                                     3131504    0.30    0.00  1.0000
  -7   4  -9 3247707  184180                                                     3205869    0.30    0.00  1.0000
  -7   4  -8 1214665  118866                                                     1249340    0.40    0.00  1.0000
  -7   4  -8 1163857  128144                                                     1197804    0.40    0.00  1.0000
  -7   4  -7 2684889  173874                                                     2742984    0.45    0.00  1.0000
  -7   4  -7 2769575  161089                                                     2828574    0.45    0.00  1.0000
  -7   4  -6 3468635  180594                                                     3408135    0.42    0.00  1.0000
  -7   4  -6 3208327  160612                                                     3150152    0.42    0.00  1.0000
  -7   4  -5  708820   83366                                                      729826    0.34    0.00  1.0000
  -7   4  -5  674400   86956                                                      694893    0.34    0.00  1.0000
  -7   4  -4  122487   54661                                                      129063    0.24    0.00  1.0000
  -7   4  -4  126826   48611                                                      133516    0.24    0.00  1.0000
  -7   4  -3 4476613  163520                                                     4448399    0.17    0.00  1.0000
  -7   4  -2 5626772  169437                                                     5659269    0.18    0.00  1.0000
  -7   5 -12 2348102  212587                                                     2351798   -0.03    0.00  1.0000
  -7   5 -11 1203720  140404                                                     1195315   -0.10    0.00  1.0000
  -7   5 -11 1236098  150488                                                     1227580   -0.10    0.00  1.0000
  -7   5 -10   56629   68216                                                       60510   -0.21    0.00  1.0000
  -7   5 -10   83551   78155                                                       88251   -0.21    0.00  1.0000
  -7   5  -9 3525120  223880                                                     3573877   -0.33    0.00  1.0000
  -7   5  -9 3417222  204411                                                     3465231   -0.33    0.00  1.0000
  -7   5  -8 9468300  317054                                                     9361774   -0.44    0.00  1.0000
  -7   5  -8 9680817  341030                                                     9573099   -0.44    0.00  1.0000
  -7   5  -7  208743   78283                                                      226975   -0.50    0.00  1.0000
  -7   5  -7  186059   71774                                                      203293   -0.50    0.00  1.0000
  -7   5  -6 4696809  214980                                                     4777491   -0.47    0.00  1.0000
  -7   5  -6 4897527  222731                                                     4979908   -0.47    0.00  1.0000
  -7   5  -5 4620347  204198                                                     4556243   -0.38    0.00  1.0000
  -7   5  -4  563213   79816                                                      579096   -0.27    0.00  1.0000
  -7   5  -3  709783   85247                                                      722297   -0.19    0.00  1.0000
  -7   5  -2 8294074  232370                                                     8251537   -0.19    0.00  1.0000
  -7   5  -1 3718104  151651                                                     3759177   -0.27    0.00  1.0000
  -7   6 -12  878667  148234                                                      875140    0.05    0.00  1.0000
  -7   6 -12  885268  134851                                                      881728    0.05    0.00  1.0000
  -7   6 -11 3474528  249153                                                     3488863    0.10    0.00  1.0000
  -7   6 -11 3458065  229573                                                     3472366    0.10    0.00  1.0000
  -7   6 -10  419259  102108                                                      409884    0.19    0.00  1.0000
  -7   6 -10  474539  106459                                                      464562    0.19    0.00  1.0000
  -7   6  -9 1345099  153296                                                     1318844    0.29    0.00  1.0000
  -7   6  -9 1492087  150935                                                     1464428    0.29    0.00  1.0000
  -7   6  -8 3798629  222450                                                     3855690    0.38    0.00  1.0000
  -7   6  -8 3746049  228872                                                     3802714    0.38    0.00  1.0000
  -7   6  -7 3445257  204766                                                     3387563    0.40    0.00  1.0000
  -7   6  -7 3668671  215709                                                     3609128    0.40    0.00  1.0000
  -7   6  -6   62289   66116                                                       67829    0.34    0.00  1.0000
  -7   6  -5 5992419  252225                                                     6035110    0.22    0.00  1.0000
  -7   6  -4 4708890  213261                                                     4693294    0.09    0.00  1.0000
  -7   6  -3  386312   74978                                                      385933    0.01    0.00  1.0000
  -7   7 -11 1810913  190247                                                     1803898   -0.07    0.00  1.0000
  -7   7 -11 1783030  182941                                                     1776069   -0.07    0.00  1.0000
  -7   7 -10  882650  140720                                                      892763   -0.14    0.00  1.0000
  -7   7 -10  825477  132248                                                      835258   -0.14    0.00  1.0000
  -7   7  -9      74   95995                                                      -49099   -0.22    0.00  1.0000
  -7   7  -9   77980   81354                                                       82807   -0.22    0.00  1.0000
  -7   7  -8 3121441  219961                                                     3085300   -0.26    0.00  1.0000
  -7   7  -8 3182113  217356                                                     3145622   -0.26    0.00  1.0000
  -7   7  -7 3632326  230917                                                     3668163   -0.24    0.00  1.0000
  -7   7  -6   72081   70875                                                       69132   -0.14    0.00  1.0000
  -7   7  -5 1954282  163667                                                     1954749    0.00    0.00  1.0000
  -7   7  -4 4404522  226519                                                     4380897    0.14    0.00  1.0000
  -7   8 -10 2402688  216126                                                     2395290    0.06    0.00  1.0000
  -7   8 -10 2255530  212182                                                     2248362    0.06    0.00  1.0000
  -7   8  -9   96940   96647                                                       99679    0.12    0.00  1.0000
  -7   8  -9  120254  100245                                                      123303    0.12    0.00  1.0000
  -7   8  -8 1172103  156409                                                     1183740    0.14    0.00  1.0000
  -7   8  -7 3416610  234601                                                     3404863    0.08    0.00  1.0000
  -7   8  -6 1069669  137274                                                     1066442   -0.04    0.00  1.0000
  -7   8  -5  102895   77384                                                       98310   -0.19    0.00  1.0000
  -7   9  -8       0   94620                                                      -64376   -0.02    0.00  1.0000
  -7   9  -7 2351613  213308                                                     2344708    0.06    0.00  1.0000
  -7   9  -6 2494061  215418                                                     2516752    0.18    0.00  1.0000
  -6  -8  -4  586253  137091                                                      568052    0.31    0.00  1.0000
  -6  -8  -3   17945   88738                                                       15429    0.26    0.00  1.0000
  -6  -8  -2 2021185  205990                                                     2047308    0.24    0.00  1.0000
  -6  -8  -1 1532912  188947                                                     1508740    0.25    0.00  1.0000
  -6  -8   0   41274   89897                                                       46179    0.30    0.00  1.0000
  -6  -8   1 1800665  188714                                                     1836801    0.34    0.00  1.0000
  -6  -8   2 2760799  223286                                                     2713338    0.37    0.00  1.0000
  -6  -8   3  169701   93737                                                      181232    0.35    0.00  1.0000
  -6  -8   4  555598  118853                                                      573259    0.30    0.00  1.0000
  -6  -8   5 1704127  176404                                                     1680890    0.23    0.00  1.0000
  -6  -8   6 1002654  151343                                                     1014831    0.16    0.00  1.0000
  -6  -8   7  435862  114728                                                      440874    0.10    0.00  1.0000
  -6  -8   8 1620858  179219                                                     1614114    0.07    0.00  1.0000
  -6  -8   9  663692  133844                                                      668234    0.07    0.00  1.0000
  -6  -7  -7 1669503  195070                                                     1718989   -0.49    0.00  1.0000
  -6  -7  -6  133384  106144                                                      148565   -0.51    0.00  1.0000
  -6  -7  -5 1487322  169790                                                     1443354   -0.47    0.00  1.0000
  -6  -7  -4 3304050  242348                                                     3359159   -0.39    0.00  1.0000
  -6  -7  -3  398670  116628                                                      383312   -0.31    0.00  1.0000
  -6  -7  -2 2087291  196157                                                     2055488   -0.28    0.00  1.0000
  -6  -7  -1 3072272  229787                                                     3114249   -0.31    0.00  1.0000
  -6  -7   0  160759   87726                                                      149943   -0.37    0.00  1.0000
  -6  -7   1   26643   86246                                                       22084   -0.43    0.00  1.0000
  -6  -7   2 4438392  259106                                                     4513251   -0.45    0.00  1.0000
  -6  -7   3 2857571  213902                                                     2800897   -0.43    0.00  1.0000
  -6  -7   4  101897   86787                                                       93001   -0.36    0.00  1.0000
  -6  -7   5 3063743  213896                                                     3100888   -0.27    0.00  1.0000
  -6  -7   6 1819204  175394                                                     1800671   -0.18    0.00  1.0000
  -6  -7   7   43024   74882                                                       44755   -0.11    0.00  1.0000
  -6  -7   8  440648  104058                                                      444160   -0.07    0.00  1.0000
  -6  -7   9 2813930  215711                                                     2804291   -0.07    0.00  1.0000
  -6  -7  10  278258   96826                                                      282654   -0.11    0.00  1.0000
  -6  -7  11  570522  122151                                                      579221   -0.15    0.00  1.0000
  -6  -6  -9     213   86884                                                      -22227    0.37    0.00  1.0000
  -6  -6  -8  914170  145779                                                      952067    0.51    0.00  1.0000
  -6  -6  -7 3031038  229579                                                     2953112    0.58    0.00  1.0000
  -6  -6  -6 1123552  154504                                                     1171119    0.57    0.00  1.0000
  -6  -6  -5 1093313  148573                                                     1133249    0.48    0.00  1.0000
  -6  -6  -4 4553500  256815                                                     4491664    0.37    0.00  1.0000
  -6  -6  -3  828785  127960                                                      848949    0.29    0.00  1.0000
  -6  -6  -2     115   82869                                                      -72426    0.27    0.00  1.0000
  -6  -6  -1 3712958  230562                                                     3663558    0.33    0.00  1.0000
  -6  -6   0 3128729  210207                                                     3188463    0.43    0.00  1.0000
  -6  -6   1   19392   74064                                                       25583    0.53    0.00  1.0000
  -6  -6   210073460  350388                                                     9929232    0.58    0.00  1.0000
  -6  -6   3 4039576  232803                                                     4128746    0.57    0.00  1.0000
  -6  -6   4  189779   74126                                                      173444    0.49    0.00  1.0000
  -6  -6   5 1395289  138919                                                     1359682    0.39    0.00  1.0000
  -6  -6   6 3251224  204832                                                     3290217    0.28    0.00  1.0000
  -6  -6   7 1280359  138799                                                     1264063    0.19    0.00  1.0000
  -6  -6   8  457072   99583                                                      450206    0.13    0.00  1.0000
  -6  -6   9 3341845  215915                                                     3358932    0.12    0.00  1.0000
  -6  -6  10  735143  117716                                                      725617    0.14    0.00  1.0000
  -6  -6  11      54   82241                                                     -152727    0.19    0.00  1.0000
  -6  -6  12  845759  134800                                                      861394    0.22    0.00  1.0000
  -6  -6  13 2704918  222067                                                     2675951    0.23    0.00  1.0000
  -6  -5 -10 2498849  220990                                                     2528629   -0.24    0.00  1.0000
  -6  -5  -9 1947736  198126                                                     1905455   -0.39    0.00  1.0000
  -6  -5  -8   61982   83339                                                       52907   -0.51    0.00  1.0000
  -6  -5  -7 3259516  226400                                                     3337815   -0.55    0.00  1.0000
  -6  -5  -6 2604820  194987                                                     2540718   -0.51    0.00  1.0000
  -6  -5  -5     262   78611                                                      -38456   -0.41    0.00  1.0000
  -6  -5  -4 1680104  159772                                                     1709975   -0.30    0.00  1.0000
  -6  -5  -3 2417638  176839                                                     2388852   -0.24    0.00  1.0000
  -6  -5  -2  635968  105911                                                      653585   -0.28    0.00  1.0000
  -6  -5  -1 2273255  176195                                                     2322167   -0.41    0.00  1.0000
  -6  -5   0 8330148  304007                                                     8196639   -0.59    0.00  1.0000
  -6  -5   1 1285507  133131                                                     1353109   -0.76    0.00  1.0000
  -6  -5   2 1213311  131528                                                     1288239   -0.85    0.00  1.0000
  -6  -5   3 8134686  284336                                                     7942261   -0.87    0.00  1.0000
  -6  -5   4 4799934  224897                                                     4938537   -0.80    0.00  1.0000
  -6  -5   5   62895   60797                                                       77244   -0.69    0.00  1.0000
  -6  -5   6 3299418  185774                                                     3220533   -0.56    0.00  1.0000
  -6  -5   7 2031472  153882                                                     2080680   -0.45    0.00  1.0000
  -6  -5   8     206   65620                                                      -16478   -0.36    0.00  1.0000
  -6  -5   9 1311791  137470                                                     1282819   -0.33    0.00  1.0000
  -6  -5  10 6695940  289794                                                     6764158   -0.34    0.00  1.0000
  -6  -5  11   75583   68841                                                       68169   -0.37    0.00  1.0000
  -6  -5  12 1004635  138620                                                      973887   -0.39    0.00  1.0000
  -6  -5  13 2911424  220763                                                     2964034   -0.39    0.00  1.0000
  -6  -4 -12 2200387  211698                                                     2196644   -0.03    0.00  1.0000
  -6  -4 -11       4   98378                                                     -101336    0.05    0.00  1.0000
  -6  -4 -10 2530209  216536                                                     2508314    0.18    0.00  1.0000
  -6  -4  -9 3774802  242619                                                     3823392    0.32    0.00  1.0000
  -6  -4  -8   64941   71441                                                       56625    0.43    0.00  1.0000
  -6  -4  -7  513411  104515                                                      487618    0.48    0.00  1.0000
  -6  -4  -6 4480369  241821                                                     4554426    0.45    0.00  1.0000
  -6  -4  -5 1964315  157683                                                     1924512    0.37    0.00  1.0000
  -6  -4  -4  899861  110423                                                      878064    0.30    0.00  1.0000
  -6  -4  -3 8691735  298989                                                     8763868    0.31    0.00  1.0000
  -6  -4  -2 1843235  141715                                                     1796823    0.45    0.00  1.0000
  -6  -4  -1   58390   59312                                                       46611    0.68    0.00  1.0000
  -6  -4   0 1955390  147079                                                     2058397    0.95    0.00  1.0000
  -6  -4   1 4033605  189155                                                     3851402    1.18    0.00  1.0000
  -6  -4   2 2101196  144761                                                     2254634    1.32    0.00  1.0000
  -6  -4   3 3171104  170875                                                     3360235    1.34    0.00  1.0000
  -6  -4   4 5439448  205715                                                     5211200    1.27    0.00  1.0000
  -6  -4   5  643608   88638                                                      716389    1.13    0.00  1.0000
  -6  -4   6  853813   97997                                                      924884    0.97    0.00  1.0000
  -6  -4   7 3283557  169236                                                     3170512    0.82    0.00  1.0000
  -6  -4   8 1670148  137643                                                     1740697    0.69    0.00  1.0000
  -6  -4   9  187425   72815                                                      209042    0.63    0.00  1.0000
  -6  -4  10 4889916  231479                                                     4784035    0.62    0.00  1.0000
  -6  -4  11 2902541  194505                                                     2988181    0.64    0.00  1.0000
  -6  -3 -13 1078929  165468                                                     1069729    0.11    0.00  1.0000
  -6  -3 -12 3724995  263011                                                     3740559    0.10    0.00  1.0000
  -6  -3 -11  284610  101754                                                      283289    0.03    0.00  1.0000
  -6  -3 -10  701265  122346                                                      707363   -0.09    0.00  1.0000
  -6  -3  -9 5284590  270408                                                     5240906   -0.24    0.00  1.0000
  -6  -3  -8 2029783  173015                                                     2071318   -0.37    0.00  1.0000
  -6  -3  -7     302   70501                                                      -66561   -0.44    0.00  1.0000
  -6  -3  -610592382  331409                                                    10481614   -0.43    0.00  1.0000
  -6  -3  -5 1781363  142104                                                     1821622   -0.39    0.00  1.0000
  -6  -3  -4   63514   56442                                                       56041   -0.39    0.00  1.0000
  -6  -3  -3 3664630  178105                                                     3592435   -0.49    0.00  1.0000
  -6  -3  -2 9336092  275787                                                     9507202   -0.71    0.00  1.0000
  -6  -3  -1 2112441  130369                                                     1996332   -1.03    0.00  1.0000
  -6  -3   0 2921905  147862                                                     2741984   -1.37    0.00  1.0000
  -6  -3   1 3255192  158906                                                     3485999   -1.63    0.00  1.0000
  -6  -3   2  769364   74149                                                      656070   -1.78    0.00  1.0000
  -6  -3   3    4929   50260                                                      -33597   -1.78    0.00  1.0000
  -6  -3   4 6225074  198517                                                     6553651   -1.67    0.01  1.0000
  -6  -3   5 8168053  220008                                                     7839811   -1.48    0.01  1.0000
  -6  -3   6   57359   44931                                                       36070   -1.26    0.01  1.0000
  -6  -3   7 4264699  180617                                                     4434129   -1.04    0.01  1.0000
  -6  -3   8 2536642  146061                                                     2431101   -0.87    0.01  1.0000
  -6  -3   9  100841   60829                                                      120644   -0.77    0.00  1.0000
  -6  -3  10  448695   86345                                                      486143   -0.74    0.00  1.0000
  -6  -2 -13   14566   89745                                                       16026   -0.15    0.00  1.0000
  -6  -2 -12 1767139  189564                                                     1751256   -0.16    0.00  1.0000
  -6  -2 -11 4925367  272999                                                     4941339   -0.09    0.00  1.0000
  -6  -2 -10       2   78885                                                      -89123    0.03    0.00  1.0000
  -6  -2  -9 6905680  296060                                                     6943550    0.18    0.00  1.0000
  -6  -2  -8 4917302  238338                                                     4863627    0.31    0.00  1.0000
  -6  -2  -7  545971   93971                                                      567854    0.38    0.00  1.0000
  -6  -2  -6 3212866  180172                                                     3265055    0.37    0.00  1.0000
  -6  -2  -511294546  304925                                                    11205437    0.34    0.00  1.0000
  -6  -2  -4 2235273  138195                                                     2277069    0.36    0.00  1.0000
  -6  -2  -3 2214244  132250                                                     2271979    0.49    0.00  1.0000
  -6  -2  -213888297  301346                                                    13667246    0.76    0.00  1.0000
  -6  -2  -1 6735301  204369                                                     6963940    1.12    0.00  1.0000
  -6  -2   032887704  427069                                                    33556140    1.47    0.00  1.0000
  -6  -2   1 7890224  194239                                                     7512900    1.74    0.00  1.0000
  -6  -2   2 9747122  210772                                                    10208528    1.87    0.00  1.0000
  -6  -2   3    1293   31841                                                        4554    1.84   -0.01  1.0000
  -6  -2   4 6587319  164076                                                     6250146    1.70   -0.01  1.0000
  -6  -2   511053561  229825                                                    11439485    1.47   -0.01  1.0000
  -6  -2   6 1834892   99228                                                     1710006    1.20   -0.01  1.0000
  -6  -2   7  543122   66094                                                      491792    0.94   -0.01  1.0000
  -6  -1 -14 2689701  232342                                                     2671694    0.14    0.00  1.0000
  -6  -1 -13 1236240  162040                                                     1254162    0.20    0.00  1.0000
  -6  -1 -12 1387844  164743                                                     1407679    0.22    0.00  1.0000
  -6  -1 -11 5666444  287828                                                     5636228    0.16    0.00  1.0000
  -6  -1 -10  319266   75359                                                      321397    0.05    0.00  1.0000
  -6  -1 -10  190310   83722                                                      191956    0.05    0.00  1.0000
  -6  -1  -9 1212792  131239                                                     1206825   -0.07    0.00  1.0000
  -6  -1  -9 1148997  106020                                                     1143190   -0.07    0.00  1.0000
  -6  -1  -8 3329215  156665                                                     3351282   -0.16    0.00  1.0000
  -6  -1  -8 3464626  194331                                                     3487136   -0.16    0.00  1.0000
  -6  -1  -7 3752437  190649                                                     3727304   -0.17    0.00  1.0000
  -6  -1  -7 3557202  149994                                                     3532733   -0.17    0.00  1.0000
  -6  -1  -6  820108   72397                                                      827449   -0.10    0.00  1.0000
  -6  -1  -6  974859   99736                                                      982861   -0.10    0.00  1.0000
  -6  -1  -515850091  251886                                                    15855285   -0.02    0.00  1.0000
  -6  -1  -516574693  345388                                                    16580001   -0.02    0.00  1.0000
  -6  -1  -4 4763605  178131                                                     4765130    0.01    0.00  1.0000
  -6  -1  -4 4302387  117741                                                     4303835    0.01    0.00  1.0000
  -6  -1  -3  382553   58775                                                      387138   -0.09    0.00  1.0000
  -6  -1  -2 5853659  171919                                                     5918282   -0.34    0.00  1.0000
  -6  -1  -113561740  240223                                                    13365739   -0.68    0.00  1.0000
  -6  -1   0 4584781  135463                                                     4759691   -1.03    0.00  1.0000
  -6  -1   1 4702848  120551                                                     4925964   -1.30    0.00  1.0000
  -6  -1   2 9085797  141391                                                     8752325   -1.43    0.01  1.0000
  -6  -1   3  526599   40334                                                      605676   -1.43    0.01  1.0000
  -6  -1   4   60027   24769                                                       86267   -1.30    0.01  1.0000
  -6   0 -14 3429750  259119                                                     3460792   -0.21    0.00  1.0000
  -6   0 -13 1738417  158435                                                     1709006   -0.29    0.00  1.0000
  -6   0 -13 1749035  178639                                                     1719534   -0.29    0.00  1.0000
  -6   0 -12   19372   79298                                                       16141   -0.31    0.00  1.0000
  -6   0 -12     152   72616                                                       -5817   -0.31    0.00  1.0000
  -6   0 -11 3746882  231849                                                     3788626   -0.28    0.00  1.0000
  -6   0 -11 3696685  200266                                                     3738150   -0.28    0.00  1.0000
  -6   0 -10 3413677  210110                                                     3385109   -0.20    0.00  1.0000
  -6   0 -10 3194844  176153                                                     3167209   -0.20    0.00  1.0000
  -6   0  -9      25   48927                                                      -17937   -0.13    0.00  1.0000
  -6   0  -9      25   61837                                                       -3369   -0.13    0.00  1.0000
  -6   0  -8 6472146  254579                                                     6493602   -0.11    0.00  1.0000
  -6   0  -8 6888981  218068                                                     6911116   -0.11    0.00  1.0000
  -6   0  -7 7224116  207688                                                     7186248   -0.18    0.00  1.0000
  -6   0  -7 7535777  257129                                                     7497101   -0.18    0.00  1.0000
  -6   0  -6 1351117  110074                                                     1381793   -0.33    0.00  1.0000
  -6   0  -6 1454823   90240                                                     1486648   -0.33    0.00  1.0000
  -6   0  -5 1951647   91538                                                     2007361   -0.51    0.00  1.0000
  -6   0  -5 1986004  123320                                                     2042203   -0.51    0.00  1.0000
  -6   0  -411893477  256312                                                    11728751   -0.61    0.00  1.0000
  -6   0  -411429075  177010                                                    11267608   -0.61    0.00  1.0000
  -6   0  -3 4109721   82729                                                     4201490   -0.58    0.00  1.0000
  -6   0  -3 4591792  148692                                                     4688765   -0.58    0.00  1.0000
  -6   0  -2 1493345   79103                                                     1529963   -0.38    0.00  1.0000
  -6   0  -110825185  177992                                                    10806662   -0.07    0.00  1.0000
  -6   0   0 6701896  114184                                                     6648497    0.26    0.00  1.0000
  -6   1 -14 1457724  155250                                                     1432988    0.27    0.00  1.0000
  -6   1 -14 1466534  177016                                                     1441723    0.27    0.00  1.0000
  -6   1 -13 3295914  240891                                                     3345237    0.35    0.00  1.0000
  -6   1 -13 3346619  215798                                                     3396319    0.35    0.00  1.0000
  -6   1 -12  915403  121609                                                      887068    0.38    0.00  1.0000
  -6   1 -12 1130965  146835                                                     1099446    0.38    0.00  1.0000
  -6   1 -11 2411860  164817                                                     2367961    0.36    0.00  1.0000
  -6   1 -11 2167551  181709                                                     2125945    0.36    0.00  1.0000
  -6   1 -10 3630733  191036                                                     3677601    0.32    0.00  1.0000
  -6   1 -10 3547152  215433                                                     3593480    0.32    0.00  1.0000
  -6   1  -9  748481   91760                                                      729612    0.29    0.00  1.0000
  -6   1  -9  727729  104890                                                      709125    0.29    0.00  1.0000
  -6   1  -8  146428   67223                                                      137674    0.33    0.00  1.0000
  -6   1  -8  127749   56773                                                      119580    0.33    0.00  1.0000
  -6   1  -7 4891906  178325                                                     4972879    0.47    0.00  1.0000
  -6   1  -7 4642956  203486                                                     4721850    0.47    0.00  1.0000
  -6   1  -611144408  240474                                                    10963314    0.69    0.00  1.0000
  -6   1  -610695902  282868                                                    10518502    0.69    0.00  1.0000
  -6   1  -5  471823   56832                                                      523809    0.93    0.00  1.0000
  -6   1  -5  408143   65966                                                      456588    0.93    0.00  1.0000
  -6   1  -413220561  209980                                                    13536102    1.10    0.00  1.0000
  -6   1  -413038954  262713                                                    13352333    1.10    0.00  1.0000
  -6   1  -3 8446441  185369                                                     8195124    1.12    0.00  1.0000
  -6   1  -3 8309649  135349                                                     8060391    1.12    0.00  1.0000
  -6   1  -2  929194   34368                                                     1003564    0.96    0.00  1.0000
  -6   1  -2 1153699   65178                                                     1236406    0.96    0.00  1.0000
  -6   1  -1 3829292   91700                                                     3933645    0.68    0.00  1.0000
  -6   2 -15  710104  129911                                                      719582   -0.14    0.00  1.0000
  -6   2 -15  856770  147907                                                      867178   -0.14    0.00  1.0000
  -6   2 -14  275781  107004                                                      285925   -0.25    0.00  1.0000
  -6   2 -14  417055  105865                                                      429509   -0.25    0.00  1.0000
  -6   2 -13 5269550  268127                                                     5212457   -0.32    0.00  1.0000
  -6   2 -13 5070891  294867                                                     5014887   -0.32    0.00  1.0000
  -6   2 -12 1512931  147404                                                     1545733   -0.34    0.00  1.0000
  -6   2 -12 1457540  166297                                                     1489738   -0.34    0.00  1.0000
  -6   2 -11     162   63575                                                      -11120   -0.32    0.00  1.0000
  -6   2 -11     162   89791                                                      -63665   -0.32    0.00  1.0000
  -6   2 -10 3652581  216894                                                     3610825   -0.28    0.00  1.0000
  -6   2 -10 3625460  192828                                                     3583860   -0.28    0.00  1.0000
  -6   2  -9 2309784  150716                                                     2340921   -0.27    0.00  1.0000
  -6   2  -9 2267185  168057                                                     2298035   -0.27    0.00  1.0000
  -6   2  -8    8084   61857                                                       10257   -0.33    0.00  1.0000
  -6   2  -8   63486   50000                                                       69403   -0.33    0.00  1.0000
  -6   2  -7 3558102  178952                                                     3486833   -0.49    0.00  1.0000
  -6   2  -7 3803531  165679                                                     3729833   -0.49    0.00  1.0000
  -6   2  -6 8904876  263214                                                     9076614   -0.73    0.00  1.0000
  -6   2  -6 8804962  231812                                                     8975739   -0.73    0.00  1.0000
  -6   2  -5 1502663  101335                                                     1409138   -1.00    0.00  1.0000
  -6   2  -5 1421814   87203                                                     1330880   -1.00    0.00  1.0000
  -6   2  -4 1099363   71441                                                     1005689   -1.18    0.00  1.0000
  -6   2  -4 1117818   80124                                                     1023345   -1.18    0.00  1.0000
  -6   2  -311811474  231946                                                    12142765   -1.22    0.00  1.0000
  -6   2  -311763365  203739                                                    12093988   -1.22    0.00  1.0000
  -6   2  -2 7057713  139290                                                     6831751   -1.09    0.00  1.0000
  -6   2  -2 7236026  154838                                                     7007205   -1.09    0.00  1.0000
  -6   2  -1 2885766   82023                                                     2776023   -0.83    0.00  1.0000
  -6   2  -1 2811696   80819                                                     2703385   -0.83    0.00  1.0000
  -6   3 -14   57694   83447                                                       61172    0.20    0.00  1.0000
  -6   3 -14      59  114600                                                      -68685    0.20    0.00  1.0000
  -6   3 -13 1356062  154234                                                     1376836    0.23    0.00  1.0000
  -6   3 -13 1718156  185196                                                     1741530    0.23    0.00  1.0000
  -6   3 -12 3351190  233971                                                     3320651    0.22    0.00  1.0000
  -6   3 -12 3329336  212972                                                     3298897    0.22    0.00  1.0000
  -6   3 -11 2634564  204298                                                     2654909    0.16    0.00  1.0000
  -6   3 -11 2676003  189076                                                     2696507    0.16    0.00  1.0000
  -6   3 -10 2260033  163154                                                     2270206    0.09    0.00  1.0000
  -6   3 -10 2290958  181374                                                     2301201    0.09    0.00  1.0000
  -6   3  -9 9126972  326227                                                     9116939    0.04    0.00  1.0000
  -6   3  -9 9426354  298474                                                     9416158    0.04    0.00  1.0000
  -6   3  -8 2691497  172758                                                     2701203    0.08    0.00  1.0000
  -6   3  -8 2708251  158338                                                     2717988    0.08    0.00  1.0000
  -6   3  -7 1434139  126938                                                     1454290    0.21    0.00  1.0000
  -6   3  -7 1484378  115150                                                     1504878    0.21    0.00  1.0000
  -6   3  -6 8879346  268949                                                     8777487    0.44    0.00  1.0000
  -6   3  -6 8591928  241421                                                     8491736    0.44    0.00  1.0000
  -6   3  -5 6491037  220573                                                     6628425    0.69    0.00  1.0000
  -6   3  -5 6270841  200856                                                     6405890    0.69    0.00  1.0000
  -6   3  -4  313394   56964                                                      353017    0.87    0.00  1.0000
  -6   3  -4  302804   60625                                                      341772    0.87    0.00  1.0000
  -6   3  -3 6580480  179391                                                     6398286    0.92    0.00  1.0000
  -6   3  -3 6756859  187040                                                     6572224    0.92    0.00  1.0000
  -6   3  -210457610  211639                                                    10661112    0.80    0.00  1.0000
  -6   3  -1   63515   30360                                                       73546    0.56    0.00  1.0000
  -6   3   0 9535085  156234                                                     9474163    0.25    0.00  1.0000
  -6   3   1 6386352  113030                                                     6379441   -0.04    0.00  1.0000
  -6   4 -14 1652569  189484                                                     1636792   -0.16    0.00  1.0000
  -6   4 -14 1766645  183585                                                     1750332   -0.16    0.00  1.0000
  -6   4 -13  885024  130636                                                      874369   -0.14    0.00  1.0000
  -6   4 -13  827350  141054                                                      817049   -0.14    0.00  1.0000
  -6   4 -12 6126321  292059                                                     6142181   -0.08    0.00  1.0000
  -6   4 -12 5850292  314897                                                     5865792   -0.08    0.00  1.0000
  -6   4 -11 3304410  233186                                                     3307911    0.02    0.00  1.0000
  -6   4 -11 3191234  205090                                                     3194674    0.02    0.00  1.0000
  -6   4 -10  762167  109311                                                      752028    0.15    0.00  1.0000
  -6   4 -10  723429  119276                                                      713551    0.15    0.00  1.0000
  -6   4  -9 4698201  245220                                                     4657528    0.24    0.00  1.0000
  -6   4  -9 4444906  219745                                                     4405347    0.24    0.00  1.0000
  -6   4  -814494176  371817                                                    14570550    0.26    0.00  1.0000
  -6   4  -814278332  400692                                                    14354135    0.26    0.00  1.0000
  -6   4  -7  159088   73325                                                      154304    0.16    0.00  1.0000
  -6   4  -7   25642   56433                                                       23740    0.16    0.00  1.0000
  -6   4  -6 7001881  250874                                                     7007402   -0.03    0.00  1.0000
  -6   4  -6 7143874  240223                                                     7149451   -0.03    0.00  1.0000
  -6   4  -5 3132555  156664                                                     3099313   -0.25    0.00  1.0000
  -6   4  -5 3325332  165950                                                     3291081   -0.25    0.00  1.0000
  -6   4  -4  601513   80102                                                      626069   -0.41    0.00  1.0000
  -6   4  -3   20826   41095                                                       20504   -0.45    0.00  1.0000
  -6   4  -213593547  269137                                                    13494564   -0.34    0.00  1.0000
  -6   4  -110567342  226628                                                    10597882   -0.12    0.00  1.0000
  -6   5 -14 1669910  184203                                                     1680254    0.10    0.00  1.0000
  -6   5 -14 2067899  217550                                                     2079408    0.10    0.00  1.0000
  -6   5 -13       6   79860                                                       -8976    0.06    0.00  1.0000
  -6   5 -13   24216   85754                                                       23582    0.06    0.00  1.0000
  -6   5 -12 1344054  157776                                                     1346624   -0.03    0.00  1.0000
  -6   5 -12 1594728  179843                                                     1597526   -0.03    0.00  1.0000
  -6   5 -11 5305135  272603                                                     5275718   -0.16    0.00  1.0000
  -6   5 -11 5306031  293336                                                     5276612   -0.16    0.00  1.0000
  -6   5 -10 3417807  213331                                                     3463822   -0.32    0.00  1.0000
  -6   5 -10 3510446  232474                                                     3557077   -0.32    0.00  1.0000
  -6   5  -9 1169115  143143                                                     1206148   -0.44    0.00  1.0000
  -6   5  -9 1109604  131785                                                     1145689   -0.44    0.00  1.0000
  -6   5  -8 6518996  265162                                                     6424523   -0.48    0.00  1.0000
  -6   5  -8 6409918  278149                                                     6316240   -0.48    0.00  1.0000
  -6   5  -7  495603   87347                                                      517231   -0.41    0.00  1.0000
  -6   5  -7  538526   96732                                                      561063   -0.41    0.00  1.0000
  -6   5  -6  351348   78113                                                      362619   -0.24    0.00  1.0000
  -6   5  -5 3151826  174624                                                     3145607   -0.05    0.00  1.0000
  -6   5  -4 8074183  259319                                                     8052272    0.10    0.00  1.0000
  -6   5  -3  239834   60783                                                      244678    0.12    0.00  1.0000
  -6   6 -13 1378826  185716                                                     1374196    0.05    0.00  1.0000
  -6   6 -13 1426162  172771                                                     1421452    0.05    0.00  1.0000
  -6   6 -12  432529  115850                                                      425383    0.14    0.00  1.0000
  -6   6 -12  398242  112276                                                      391386    0.14    0.00  1.0000
  -6   6 -11 3478473  247341                                                     3517418    0.27    0.00  1.0000
  -6   6 -11 3633574  240165                                                     3673375    0.27    0.00  1.0000
  -6   6 -10 1696860  166927                                                     1656258    0.41    0.00  1.0000
  -6   6 -10 1700939  174891                                                     1660288    0.41    0.00  1.0000
  -6   6  -9   37117   70255                                                       29799    0.51    0.00  1.0000
  -6   6  -9  101960   76467                                                       89569    0.51    0.00  1.0000
  -6   6  -8 1813430  166556                                                     1868431    0.52    0.00  1.0000
  -6   6  -8 1993118  165317                                                     2050762    0.52    0.00  1.0000
  -6   6  -7 3748577  219592                                                     3683615    0.43    0.00  1.0000
  -6   6  -6  959446  119894                                                      979556    0.26    0.00  1.0000
  -6   6  -5 5552630  244907                                                     5565029    0.07    0.00  1.0000
  -6   7 -12      78  111619                                                      -78545   -0.22    0.00  1.0000
  -6   7 -12   56740   88179                                                       53035   -0.22    0.00  1.0000
  -6   7 -11  335850  102142                                                      321670   -0.33    0.00  1.0000
  -6   7 -11  389498  111478                                                      374216   -0.33    0.00  1.0000
  -6   7 -10 4189679  262522                                                     4259146   -0.43    0.00  1.0000
  -6   7 -10 4196320  270690                                                     4265842   -0.43    0.00  1.0000
  -6   7  -9  665352  115625                                                      634961   -0.49    0.00  1.0000
  -6   7  -9  669899  121809                                                      639403   -0.49    0.00  1.0000
  -6   7  -8 1052065  138594                                                     1015970   -0.45    0.00  1.0000
  -6   7  -7 4175508  247187                                                     4226455   -0.32    0.00  1.0000
  -6   7  -6 2241973  181276                                                     2228396   -0.12    0.00  1.0000
  -6   8 -11  174024  102214                                                      184059    0.30    0.00  1.0000
  -6   8 -11  213485  106809                                                      224585    0.30    0.00  1.0000
  -6   8 -10 3126849  238041                                                     3074666    0.38    0.00  1.0000
  -6   8 -10 3124358  248230                                                     3072196    0.38    0.00  1.0000
  -6   8  -9 1133352  161395                                                     1166172    0.40    0.00  1.0000
  -6   8  -8   73493   89746                                                       66942    0.32    0.00  1.0000
  -6   8  -7 1055757  146620                                                     1043091    0.16    0.00  1.0000
  -6   9 -10  278507  121291                                                      288670   -0.25    0.00  1.0000
  -6   9 -10  449644  135760                                                      462534   -0.25    0.00  1.0000
  -6   9  -9 3463008  268404                                                     3427253   -0.25    0.00  1.0000
  -6   9  -8 1079770  162511                                                     1092861   -0.16    0.00  1.0000
  -6  10  -8 1434843  199165                                                     1434071    0.01    0.00  1.0000
  -5  -9  -4 1794703  207233                                                     1803155   -0.08    0.00  1.0000
  -5  -9  -3  377226  125645                                                      378257   -0.02    0.00  1.0000
  -5  -9  -2 1678288  198696                                                     1676679   -0.02    0.00  1.0000
  -5  -9  -1 1279258  153926                                                     1285651   -0.07    0.00  1.0000
  -5  -9  -1 1637468  194048                                                     1644700   -0.07    0.00  1.0000
  -5  -9   0   17673  107407                                                       15914   -0.17    0.00  1.0000
  -5  -9   0  128269   84146                                                      123452   -0.17    0.00  1.0000
  -5  -9   1  862085  134836                                                      842270   -0.28    0.00  1.0000
  -5  -9   1  861049  150313                                                      841246   -0.28    0.00  1.0000
  -5  -9   2 2028238  211504                                                     2067274   -0.35    0.00  1.0000
  -5  -9   3  318430  111885                                                      302517   -0.37    0.00  1.0000
  -5  -9   4  620258  133238                                                      600271   -0.33    0.00  1.0000
  -5  -9   5 1102214  160163                                                     1122654   -0.25    0.00  1.0000
  -5  -9   6  887960  146756                                                      875326   -0.17    0.00  1.0000
  -5  -9   7   71969  100800                                                       69849   -0.12    0.00  1.0000
  -5  -9   8 2202870  222203                                                     2213384   -0.09    0.00  1.0000
  -5  -8  -7 2364627  235268                                                     2319894    0.37    0.00  1.0000
  -5  -8  -6   60039   99831                                                       66859    0.35    0.00  1.0000
  -5  -8  -5 2357828  223724                                                     2389654    0.26    0.00  1.0000
  -5  -8  -4 2936214  213884                                                     2913952    0.17    0.00  1.0000
  -5  -8  -4 2809371  241071                                                     2787597    0.17    0.00  1.0000
  -5  -8  -3      19  111312                                                      -52126    0.11    0.00  1.0000
  -5  -8  -3      19   73503                                                       -1641    0.11    0.00  1.0000
  -5  -8  -2  504138  127779                                                      511122    0.13    0.00  1.0000
  -5  -8  -2  787901  121923                                                      796626    0.13    0.00  1.0000
  -5  -8  -1 4117331  238397                                                     4082497    0.22    0.00  1.0000
  -5  -8  -1 4210449  280737                                                     4175222    0.22    0.00  1.0000
  -5  -8   0  355813  100068                                                      372259    0.36    0.00  1.0000
  -5  -8   0  461218  127564                                                      479918    0.36    0.00  1.0000
  -5  -8   1  270067  107000                                                      290398    0.49    0.00  1.0000
  -5  -8   1  373732   98358                                                      397585    0.49    0.00  1.0000
  -5  -8   2 2291432  203225                                                     2224791    0.57    0.00  1.0000
  -5  -8   3 2011720  196773                                                     2075712    0.58    0.00  1.0000
  -5  -8   4     399  100125                                                      -93735    0.51    0.00  1.0000
  -5  -8   5 2308440  199997                                                     2261860    0.40    0.00  1.0000
  -5  -8   6 3098138  231805                                                     3136866    0.28    0.00  1.0000
  -5  -8   7      59   83836                                                      -11451    0.19    0.00  1.0000
  -5  -8   8  859442  141783                                                      848601    0.15    0.00  1.0000
  -5  -8   9  878722  145590                                                      889080    0.15    0.00  1.0000
  -5  -8  10  744326  137903                                                      733227    0.17    0.00  1.0000
  -5  -8  11   37322   95101                                                       34834    0.19    0.00  1.0000
  -5  -7  -9     226   98024                                                      -36900   -0.38    0.00  1.0000
  -5  -7  -8  808703  146348                                                      773639   -0.51    0.00  1.0000
  -5  -7  -7 2582724  198909                                                     2651849   -0.55    0.00  1.0000
  -5  -7  -7 3113040  247920                                                     3188887   -0.55    0.00  1.0000
  -5  -7  -6 1155110  159507                                                     1113868   -0.50    0.00  1.0000
  -5  -7  -6  896820  119613                                                      860523   -0.50    0.00  1.0000
  -5  -7  -5  111973   71281                                                      102232   -0.38    0.00  1.0000
  -5  -7  -5  260909  104725                                                      245928   -0.38    0.00  1.0000
  -5  -7  -4 3381984  243345                                                     3420633   -0.27    0.00  1.0000
  -5  -7  -4 3320317  211040                                                     3358614   -0.27    0.00  1.0000
  -5  -7  -3 1038415  144630                                                     1021700   -0.22    0.00  1.0000
  -5  -7  -3 1047818  129138                                                     1031027   -0.22    0.00  1.0000
  -5  -7  -2  393562  109059                                                      380914   -0.26    0.00  1.0000
  -5  -7  -2  331698   88448                                                      320095   -0.26    0.00  1.0000
  -5  -7  -1 3592495  242750                                                     3650333   -0.39    0.00  1.0000
  -5  -7  -1 3722332  215582                                                     3781203   -0.39    0.00  1.0000
  -5  -7   0 4047283  219008                                                     3959383   -0.56    0.00  1.0000
  -5  -7   0 3787737  241632                                                     3702717   -0.56    0.00  1.0000
  -5  -7   1  254297  104488                                                      283341   -0.71    0.00  1.0000
  -5  -7   1  407625   90377                                                      444190   -0.71    0.00  1.0000
  -5  -7   2 4303944  256768                                                     4433281   -0.79    0.00  1.0000
  -5  -7   3 4066442  243277                                                     3947218   -0.76    0.00  1.0000
  -5  -7   4  437131  108051                                                      471122   -0.65    0.00  1.0000
  -5  -7   5  701057  121278                                                      733922   -0.50    0.00  1.0000
  -5  -7   6 3570438  235434                                                     3520145   -0.34    0.00  1.0000
  -5  -7   7 2552361  202601                                                     2580165   -0.22    0.00  1.0000
  -5  -7   8  659786  128675                                                      669703   -0.15    0.00  1.0000
  -5  -7   9 1449069  162196                                                     1436122   -0.14    0.00  1.0000
  -5  -7  10 2210554  199080                                                     2229850   -0.17    0.00  1.0000
  -5  -7  11      71   95644                                                      -42720   -0.21    0.00  1.0000
  -5  -7  12  997796  157185                                                      977503   -0.26    0.00  1.0000
  -5  -7  13 2716289  238181                                                     2754603   -0.30    0.00  1.0000
  -5  -6 -11  725824  151768                                                      739977    0.21    0.00  1.0000
  -5  -6 -10 1224852  148838                                                     1191196    0.40    0.00  1.0000
  -5  -6 -10 1569146  189022                                                     1531023    0.40    0.00  1.0000
  -5  -6  -9 1400552  152362                                                     1454346    0.58    0.00  1.0000
  -5  -6  -9 1548501  185303                                                     1605040    0.58    0.00  1.0000
  -5  -6  -8  275358   84051                                                      247318    0.70    0.00  1.0000
  -5  -6  -8  225771   99858                                                      200453    0.70    0.00  1.0000
  -5  -6  -7 2866502  224614                                                     2774008    0.71    0.00  1.0000
  -5  -6  -7 2280842  171484                                                     2198417    0.71    0.00  1.0000
  -5  -6  -6 4032147  254067                                                     4129609    0.62    0.00  1.0000
  -5  -6  -6 3804973  215829                                                     3899666    0.62    0.00  1.0000
  -5  -6  -5   41388   79080                                                       34583    0.47    0.00  1.0000
  -5  -6  -5     343   66005                                                      -37968    0.47    0.00  1.0000
  -5  -6  -4 1566368  138220                                                     1533690    0.34    0.00  1.0000
  -5  -6  -4 1619134  166388                                                     1585907    0.34    0.00  1.0000
  -5  -6  -3 3571495  201039                                                     3615203    0.30    0.00  1.0000
  -5  -6  -3 3511254  224121                                                     3554593    0.30    0.00  1.0000
  -5  -6  -2  368232   77890                                                      350921    0.38    0.00  1.0000
  -5  -6  -2  425448  102825                                                      406826    0.38    0.00  1.0000
  -5  -6  -1     486   67547                                                      -20447    0.56    0.00  1.0000
  -5  -6  -1     486   81903                                                       -9986    0.56    0.00  1.0000
  -5  -6   0 9437291  305493                                                     9624878    0.78    0.00  1.0000
  -5  -6   0 8908048  339114                                                     9090324    0.78    0.00  1.0000
  -5  -6   1 4800497  243836                                                     4638516    0.95    0.00  1.0000
  -5  -6   1 4922708  216662                                                     4758661    0.95    0.00  1.0000
  -5  -6   2  380910   92668                                                      333175    1.02    0.00  1.0000
  -5  -6   3 5780801  270785                                                     5965743    0.98    0.00  1.0000
  -5  -6   4 2720912  187384                                                     2615568    0.83    0.00  1.0000
  -5  -6   5     624   80096                                                      -61438    0.63    0.00  1.0000
  -5  -6   6 3414684  207757                                                     3477516    0.43    0.00  1.0000
  -5  -6   7 6699165  284480                                                     6644044    0.27    0.00  1.0000
  -5  -6   8  152962   84557                                                      158165    0.17    0.00  1.0000
  -5  -6   9 1311688  148009                                                     1323854    0.14    0.00  1.0000
  -5  -6  10 3977042  244801                                                     3952414    0.16    0.00  1.0000
  -5  -6  11 1433926  166289                                                     1454484    0.22    0.00  1.0000
  -5  -6  12  877273  143007                                                      898627    0.29    0.00  1.0000
  -5  -6  13 3817604  258780                                                     3765903    0.34    0.00  1.0000
  -5  -6  14 1064744  159459                                                     1092850    0.35    0.00  1.0000
  -5  -5 -12 2249501  196991                                                     2229381   -0.17    0.00  1.0000
  -5  -5 -12 2303900  233477                                                     2283537   -0.17    0.00  1.0000
  -5  -5 -11   63414   97690                                                       70240   -0.34    0.00  1.0000
  -5  -5 -11     178   72562                                                       -9411   -0.34    0.00  1.0000
  -5  -5 -10 1520713  180000                                                     1572031   -0.53    0.00  1.0000
  -5  -5 -10 1328232  149776                                                     1376220   -0.53    0.00  1.0000
  -5  -5  -9 4751948  277686                                                     4633062   -0.70    0.00  1.0000
  -5  -5  -9 4211032  225845                                                     4099160   -0.70    0.00  1.0000
  -5  -5  -8   80560   86191                                                       97412   -0.80    0.00  1.0000
  -5  -5  -8   66672   68833                                                       82057   -0.80    0.00  1.0000
  -5  -5  -7  704785  120253                                                      755473   -0.77    0.00  1.0000
  -5  -5  -7  702645  103481                                                      753256   -0.77    0.00  1.0000
  -5  -5  -6 3927930  199401                                                     3828907   -0.65    0.00  1.0000
  -5  -5  -6 4265210  239764                                                     4161997   -0.65    0.00  1.0000
  -5  -5  -5 3453663  187070                                                     3524114   -0.48    0.00  1.0000
  -5  -5  -5 3517536  217541                                                     3588632   -0.48    0.00  1.0000
  -5  -5  -4     205   64875                                                      -34677   -0.36    0.00  1.0000
  -5  -5  -4   13083   74345                                                       16198   -0.36    0.00  1.0000
  -5  -5  -3 5096673  213469                                                     5032762   -0.36    0.00  1.0000
  -5  -5  -3 4983401  239456                                                     4920207   -0.36    0.00  1.0000
  -5  -5  -2 1239811  130449                                                     1283682   -0.51    0.00  1.0000
  -5  -5  -2 1385832  120916                                                     1432194   -0.51    0.00  1.0000
  -5  -5  -1  216756   77867                                                      189296   -0.77    0.00  1.0000
  -5  -5  -1  192880   62724                                                      167029   -0.77    0.00  1.0000
  -5  -5   0  818777   87826                                                      749963   -1.06    0.00  1.0000
  -5  -5   0  739997  100347                                                      674640   -1.06    0.00  1.0000
  -5  -5   1 5044540  204446                                                     5270083   -1.27    0.00  1.0000
  -5  -5   1 5110349  240082                                                     5337343   -1.27    0.00  1.0000
  -5  -5   2 2258239  158716                                                     2099465   -1.37    0.00  1.0000
  -5  -5   3 3867947  197608                                                     3667830   -1.32    0.00  1.0000
  -5  -5   4 7829312  281520                                                     8083765   -1.15    0.00  1.0000
  -5  -5   5  661777   95616                                                      605099   -0.93    0.00  1.0000
  -5  -5   6  421879   83653                                                      387967   -0.69    0.00  1.0000
  -5  -5   7 2567231  172776                                                     2627823   -0.49    0.00  1.0000
  -5  -5   8 5274383  242462                                                     5212078   -0.35    0.00  1.0000
  -5  -5   9  728046  110475                                                      709239   -0.28    0.00  1.0000
  -5  -5  10 2588512  189381                                                     2624778   -0.29    0.00  1.0000
  -5  -5  11 3216811  216145                                                     3168391   -0.35    0.00  1.0000
  -5  -5  12     274   78011                                                       -8815   -0.42    0.00  1.0000
  -5  -5  13 2424208  214608                                                     2481213   -0.47    0.00  1.0000
  -5  -4 -13  898068  133848                                                      891660    0.09    0.00  1.0000
  -5  -4 -13  928272  157044                                                      921757    0.09    0.00  1.0000
  -5  -4 -12 4612665  293737                                                     4644818    0.19    0.00  1.0000
  -5  -4 -12 4579681  259150                                                     4611718    0.19    0.00  1.0000
  -5  -4 -11  882496  122358                                                      857301    0.35    0.00  1.0000
  -5  -4 -11 1065822  154017                                                     1038116    0.35    0.00  1.0000
  -5  -4 -10  532188   98762                                                      502452    0.53    0.00  1.0000
  -5  -4 -10  659346  123496                                                      626201    0.53    0.00  1.0000
  -5  -4  -9 7036247  324333                                                     7179900    0.69    0.00  1.0000
  -5  -4  -9 6902546  277084                                                     7044834    0.69    0.00  1.0000
  -5  -4  -8 2946680  175635                                                     2845420    0.77    0.00  1.0000
  -5  -4  -8 2956146  205821                                                     2854721    0.77    0.00  1.0000
  -5  -4  -7     840   63881                                                      -34553    0.73    0.00  1.0000
  -5  -4  -7     840   76503                                                      -41707    0.73    0.00  1.0000
  -5  -4  -6 7079806  245429                                                     7208531    0.62    0.00  1.0000
  -5  -4  -6 7336367  295714                                                     7467393    0.62    0.00  1.0000
  -5  -4  -5 9690009  318445                                                     9573281    0.48    0.00  1.0000
  -5  -4  -5 8413057  253393                                                     8304316    0.48    0.00  1.0000
  -5  -4  -4  315584   84401                                                      334437    0.42    0.00  1.0000
  -5  -4  -4  196781   60932                                                      211725    0.42    0.00  1.0000
  -5  -4  -3 3066496  179082                                                     3137412    0.52    0.00  1.0000
  -5  -4  -3 2958047  149916                                                     3027704    0.52    0.00  1.0000
  -5  -4  -2 7066713  253363                                                     6907374    0.77    0.00  1.0000
  -5  -4  -2 7038917  215697                                                     6879895    0.77    0.00  1.0000
  -5  -4  -1 1423106  104572                                                     1530402    1.14    0.00  1.0000
  -5  -4  -1 1465815  127167                                                     1574682    1.14    0.00  1.0000
  -5  -4   0 5959269  234092                                                     6251479    1.50    0.00  1.0000
  -5  -4   0 5830121  193395                                                     6119185    1.50    0.00  1.0000
  -5  -4   111808024  310914                                                    11334702    1.78    0.00  1.0000
  -5  -4   2 3466362  179295                                                     3747285    1.89    0.00  1.0000
  -5  -4   3  274125   69161                                                      355158    1.85    0.00  1.0000
  -5  -4   4 5739671  208865                                                     5431402    1.67    0.00  1.0000
  -5  -4   5 6416736  230990                                                     6700791    1.42    0.00  1.0000
  -5  -4   6  185684   64466                                                      149025    1.14    0.00  1.0000
  -5  -4   7 2542618  153061                                                     2434101    0.89    0.00  1.0000
  -5  -4   8 4840567  219404                                                     4960957    0.70    0.00  1.0000
  -5  -4   9    8170   62331                                                        4694    0.60    0.00  1.0000
  -5  -4  10  722878  103315                                                      684917    0.59    0.00  1.0000
  -5  -4  11 4633367  242890                                                     4740846    0.64    0.00  1.0000
  -5  -4  12 1346883  151050                                                     1284287    0.70    0.00  1.0000
  -5  -3 -14 2613979  211358                                                     2616643   -0.02    0.00  1.0000
  -5  -3 -14 2732806  246231                                                     2735531   -0.02    0.00  1.0000
  -5  -3 -13  237956   91581                                                      239621   -0.04    0.00  1.0000
  -5  -3 -13  137099  109248                                                      138364   -0.04    0.00  1.0000
  -5  -3 -12 2756556  222974                                                     2741045   -0.12    0.00  1.0000
  -5  -3 -12 2663050  194881                                                     2647804   -0.12    0.00  1.0000
  -5  -3 -11 2893851  195128                                                     2927798   -0.26    0.00  1.0000
  -5  -3 -11 2887420  223724                                                     2921330   -0.26    0.00  1.0000
  -5  -3 -10     284   84217                                                      -14728   -0.43    0.00  1.0000
  -5  -3 -10  143952   72664                                                      131600   -0.43    0.00  1.0000
  -5  -3  -9 2466870  160459                                                     2396441   -0.58    0.00  1.0000
  -5  -3  -9 2618643  195434                                                     2546065   -0.58    0.00  1.0000
  -5  -3  -812932599  336413                                                    13121284   -0.67    0.00  1.0000
  -5  -3  -813787255  403605                                                    13982051   -0.67    0.00  1.0000
  -5  -3  -7     673   73074                                                      -49902   -0.66    0.00  1.0000
  -5  -3  -7   51046   50321                                                       41952   -0.66    0.00  1.0000
  -5  -3  -6  695023   83199                                                      658449   -0.58    0.00  1.0000
  -5  -3  -6  796345  103520                                                      757163   -0.58    0.00  1.0000
  -5  -3  -5 6578321  208077                                                     6681400   -0.51    0.00  1.0000
  -5  -3  -5 7184476  260443                                                     7292183   -0.51    0.00  1.0000
  -5  -3  -4 6317835  232785                                                     6209941   -0.55    0.00  1.0000
  -5  -3  -4 5765469  184775                                                     5662420   -0.55    0.00  1.0000
  -5  -3  -332580984  411770                                                    32252742   -0.75    0.00  1.0000
  -5  -3  -3  118051   54785                                                       99026   -0.75    0.00  1.0000
  -5  -3  -218892000  374141                                                    19277084   -1.12    0.00  1.0000
  -5  -3  -218758832  307865                                                    19142562   -1.12    0.00  1.0000
  -5  -3  -1 8142265  234857                                                     7792894   -1.58    0.00  1.0000
  -5  -3  -1 7774506  187082                                                     7433203   -1.58    0.00  1.0000
  -5  -3   0 1301492   95603                                                     1125869   -2.02    0.00  1.0000
  -5  -3   0 1282111   72416                                                     1107848   -2.02    0.00  1.0000
  -5  -3   1 6510938  216591                                                     6985587   -2.33    0.00  1.0000
  -5  -3   216809514  315880                                                    16025253   -2.47    0.00  1.0000
  -5  -3   3 2666391  139238                                                     2984924   -2.41    0.00  1.0000
  -5  -3   4 3261796  150101                                                     3580103   -2.20    0.00  1.0000
  -5  -3   5 9550388  239829                                                     9097095   -1.90    0.00  1.0000
  -5  -3   6 1724634  120158                                                     1888079   -1.56    0.00  1.0000
  -5  -3   7  522387   80445                                                      594523   -1.25    0.00  1.0000
  -5  -3   8 4120694  185590                                                     3964594   -1.00    0.00  1.0000
  -5  -3   9 7684803  269481                                                     7874167   -0.87    0.00  1.0000
  -5  -3  10   50318   70131                                                       66042   -0.84    0.00  1.0000
  -5  -2 -15 1004142  169969                                                     1006204    0.03    0.00  1.0000
  -5  -2 -15 1280555  159360                                                     1282884    0.03    0.00  1.0000
  -5  -2 -14 2340277  231892                                                     2342360   -0.02    0.00  1.0000
  -5  -2 -14 2367139  195784                                                     2369234   -0.02    0.00  1.0000
  -5  -2 -13 1131775  164122                                                     1129377   -0.03    0.00  1.0000
  -5  -2 -13 1092191  135687                                                     1089836   -0.03    0.00  1.0000
  -5  -2 -12 1026811  149496                                                     1028456    0.02    0.00  1.0000
  -5  -2 -12  882144  124035                                                      883669    0.02    0.00  1.0000
  -5  -2 -11 7493361  289820                                                     7463788    0.14    0.00  1.0000
  -5  -2 -11 7841082  339997                                                     7810831    0.14    0.00  1.0000
  -5  -2 -10 1440780  150944                                                     1468604    0.30    0.00  1.0000
  -5  -2 -10 1358668  130973                                                     1385692    0.30    0.00  1.0000
  -5  -2  -9   69812   73330                                                       79124    0.45    0.00  1.0000
  -5  -2  -9  213231   69806                                                      229305    0.45    0.00  1.0000
  -5  -2  -8 9434299  319328                                                     9305300    0.54    0.00  1.0000
  -5  -2  -8 9770996  275645                                                     9639708    0.54    0.00  1.0000
  -5  -2  -7 4966854  189440                                                     5061379    0.54    0.00  1.0000
  -5  -2  -7 4971806  227055                                                     5066377    0.54    0.00  1.0000
  -5  -2  -6   65894   41232                                                       56330    0.49    0.00  1.0000
  -5  -2  -6   51844   55900                                                       43403    0.49    0.00  1.0000
  -5  -2  -5 8186262  206043                                                     8082554    0.46    0.00  1.0000
  -5  -2  -5 8579144  259712                                                     8472967    0.46    0.00  1.0000
  -5  -2  -410445458  272521                                                    10586550    0.56    0.00  1.0000
  -5  -2  -410465516  216906                                                    10606743    0.56    0.00  1.0000
  -5  -2  -3    1057   49718                                                      -21120    0.82    0.00  1.0000
  -5  -2  -3    1057   33597                                                      -24476    0.82    0.00  1.0000
  -5  -2  -2 9855402  234654                                                     9548695    1.25    0.00  1.0000
  -5  -2  -2 9712944  180003                                                     9408478    1.25    0.00  1.0000
  -5  -2  -1 8036718  212701                                                     8430566    1.76    0.00  1.0000
  -5  -2  -1 7220899  146734                                                     7594460    1.76    0.00  1.0000
  -5  -2   0 6181889  172687                                                     5753570    2.23    0.00  1.0000
  -5  -2   1 2315094  104969                                                     2019994    2.56    0.00  1.0000
  -5  -2   212534134  239529                                                    13291935    2.69    0.00  1.0000
  -5  -2   3 6371638  158739                                                     5864095    2.62    0.00  1.0000
  -5  -2   4 1967101   91280                                                     1711945    2.39    0.00  1.0000
  -5  -2   5 6960388  188887                                                     7386999    2.04    0.00  1.0000
  -5  -2   612466158  256150                                                    12015002    1.64    0.00  1.0000
  -5  -2   7  460399   70473                                                      530759    1.27    0.00  1.0000
  -5  -2   8 7455065  238049                                                     7667023    0.98    0.00  1.0000
  -5  -1 -15   85910  105896                                                       86652    0.03    0.00  1.0000
  -5  -1 -15   24628   78542                                                       25026    0.03    0.00  1.0000
  -5  -1 -14 3666863  264268                                                     3651423    0.10    0.00  1.0000
  -5  -1 -14 3163749  215744                                                     3149409    0.10    0.00  1.0000
  -5  -1 -13 2779336  199356                                                     2797095    0.14    0.00  1.0000
  -5  -1 -13 2757683  228504                                                     2775372    0.14    0.00  1.0000
  -5  -1 -12      17   92902                                                      -46156    0.10    0.00  1.0000
  -5  -1 -12   99496   77301                                                      102065    0.10    0.00  1.0000
  -5  -1 -11 3649604  202554                                                     3649576    0.00    0.00  1.0000
  -5  -1 -11 3565014  232029                                                     3564985    0.00    0.00  1.0000
  -5  -1 -10 5195173  257432                                                     5169904   -0.14    0.00  1.0000
  -5  -1 -10 5084513  222540                                                     5059515   -0.14    0.00  1.0000
  -5  -1  -9 1652379  149552                                                     1679708   -0.27    0.00  1.0000
  -5  -1  -9 1598608  125225                                                     1625491   -0.27    0.00  1.0000
  -5  -1  -8 1939095  127168                                                     1974155   -0.32    0.00  1.0000
  -5  -1  -8 2136491  159062                                                     2173285   -0.32    0.00  1.0000
  -5  -1  -714156780  298508                                                    14072079   -0.29    0.00  1.0000
  -5  -1  -714835396  362484                                                    14748684   -0.29    0.00  1.0000
  -5  -1  -6  272722   51791                                                      280026   -0.19    0.00  1.0000
  -5  -1  -6  155002   56523                                                      160518   -0.19    0.00  1.0000
  -5  -1  -5 1377583   83972                                                     1389416   -0.13    0.00  1.0000
  -5  -1  -5 1397161  105783                                                     1409077   -0.13    0.00  1.0000
  -5  -1  -410605732  192648                                                    10557677   -0.19    0.00  1.0000
  -5  -1  -411083249  256980                                                    11034121   -0.19    0.00  1.0000
  -5  -1  -313098299  261772                                                    13221236   -0.43    0.00  1.0000
  -5  -1  -312501341  184727                                                    12621451   -0.43    0.00  1.0000
  -5  -1  -2   45821   17252                                                       34551   -0.84    0.00  1.0000
  -5  -1  -2    1106   38775                                                      -13962   -0.84    0.00  1.0000
  -5  -1  -117728062  256829                                                    17288204   -1.34    0.00  1.0000
  -5  -1   014476819  225672                                                    15021604   -1.81    0.00  1.0000
  -5  -1   1  268714   41473                                                      363453   -2.15    0.00  1.0000
  -5  -1   2 3224142   86319                                                     2913650   -2.29    0.00  1.0000
  -5  -1   316528930  208110                                                    17252302   -2.24    0.00  1.0000
  -5  -1   4  804716   52124                                                      671093   -2.02    0.01  1.0000
  -5  -1   5 7243703  160924                                                     6893165   -1.68    0.01  1.0000
  -5   0 -15      45  114916                                                      -16430   -0.17    0.00  1.0000
  -5   0 -15   61516   80581                                                       64687   -0.17    0.00  1.0000
  -5   0 -14 1472150  180781                                                     1496839   -0.26    0.00  1.0000
  -5   0 -14 1379423  153932                                                     1403324   -0.26    0.00  1.0000
  -5   0 -13 5571731  267315                                                     5514886   -0.31    0.00  1.0000
  -5   0 -13 5630579  300518                                                     5573436   -0.31    0.00  1.0000
  -5   0 -12 1878530  181143                                                     1909545   -0.29    0.00  1.0000
  -5   0 -12 1680918  151957                                                     1710263   -0.29    0.00  1.0000
  -5   0 -11 1313575  133303                                                     1331684   -0.20    0.00  1.0000
  -5   0 -11 1251456  143794                                                     1269133   -0.20    0.00  1.0000
  -5   0 -10 5383575  256420                                                     5367292   -0.09    0.00  1.0000
  -5   0 -10 5183215  222614                                                     5167238   -0.09    0.00  1.0000
  -5   0  -9  713849  105910                                                      714785   -0.01    0.00  1.0000
  -5   0  -9  803192   94881                                                      804185   -0.01    0.00  1.0000
  -5   0  -8  700031   81603                                                      702066   -0.03    0.00  1.0000
  -5   0  -8  718472  102119                                                      720534   -0.03    0.00  1.0000
  -5   0  -7 7481028  253475                                                     7447564   -0.16    0.00  1.0000
  -5   0  -7 7212380  212104                                                     7179522   -0.16    0.00  1.0000
  -5   0  -610389380  231597                                                    10478055   -0.35    0.00  1.0000
  -5   0  -610355683  277337                                                    10444213   -0.35    0.00  1.0000
  -5   0  -5   51851   34552                                                       43005   -0.52    0.00  1.0000
  -5   0  -5  102458   49179                                                       89858   -0.52    0.00  1.0000
  -5   0  -416383121  227970                                                    16206584   -0.56    0.00  1.0000
  -5   0  -414489574  277770                                                    14323580   -0.56    0.00  1.0000
  -5   0  -315310029  259692                                                    15432937   -0.40    0.00  1.0000
  -5   0  -315045838  184154                                                    15167683   -0.40    0.00  1.0000
  -5   0  -2 3452442  111967                                                     3444431   -0.05    0.00  1.0000
  -5   0  -2 3100314   59982                                                     3092723   -0.05    0.00  1.0000
  -5   0  -1  637743   47306                                                      661958    0.40    0.00  1.0000
  -5   0   011565584  146491                                                    11336822    0.87    0.00  1.0000
  -5   1 -16 2068453  203849                                                     2087997    0.18    0.00  1.0000
  -5   1 -16 2600280  238812                                                     2622188    0.18    0.00  1.0000
  -5   1 -15 1095719  166300                                                     1070979    0.31    0.00  1.0000
  -5   1 -15 1361431  162537                                                     1333838    0.31    0.00  1.0000
  -5   1 -14     829   92649                                                        1988    0.42    0.00  1.0000
  -5   1 -14     276   74029                                                      -24852    0.42    0.00  1.0000
  -5   1 -13 6034799  288229                                                     6128077    0.48    0.00  1.0000
  -5   1 -13 6204756  320816                                                     6299334    0.48    0.00  1.0000
  -5   1 -12 2694285  185210                                                     2633973    0.48    0.00  1.0000
  -5   1 -12 2474251  198197                                                     2416468    0.48    0.00  1.0000
  -5   1 -11  979403  132105                                                      947242    0.42    0.00  1.0000
  -5   1 -11  906637  110849                                                      875704    0.42    0.00  1.0000
  -5   1 -10 2939834  199329                                                     2985788    0.34    0.00  1.0000
  -5   1 -10 3008622  176850                                                     3055109    0.34    0.00  1.0000
  -5   1  -9 1816841  152763                                                     1783583    0.33    0.00  1.0000
  -5   1  -9 1724085  125920                                                     1691691    0.33    0.00  1.0000
  -5   1  -8  160469   68972                                                      173726    0.43    0.00  1.0000
  -5   1  -8  149293   59807                                                      162089    0.43    0.00  1.0000
  -5   1  -7 5890051  199126                                                     6014901    0.65    0.00  1.0000
  -5   1  -7 5908610  227187                                                     6033655    0.65    0.00  1.0000
  -5   1  -619483200  323785                                                    19154682    0.95    0.00  1.0000
  -5   1  -619416282  372544                                                    19088330    0.95    0.00  1.0000
  -5   1  -5 4682998  177715                                                     4893606    1.23    0.00  1.0000
  -5   1  -5 4808118  153826                                                     5021492    1.23    0.00  1.0000
  -5   1  -4 2511379  122440                                                     2683707    1.36    0.00  1.0000
  -5   1  -4 2514692  102489                                                     2687130    1.36    0.00  1.0000
  -5   1  -310268913  205220                                                     9948984    1.29    0.00  1.0000
  -5   1  -310463031  167532                                                    10140071    1.29    0.00  1.0000
  -5   1  -2 2883340   99232                                                     3015858    1.00    0.00  1.0000
  -5   1  -2 2790945   76315                                                     2921345    1.00    0.00  1.0000
  -5   1  -1   75099   23342                                                       87603    0.57    0.00  1.0000
  -5   2 -16 2275016  207573                                                     2252119   -0.20    0.00  1.0000
  -5   2 -16 2151879  224686                                                     2129611   -0.20    0.00  1.0000
  -5   2 -15 3927050  284169                                                     3980409   -0.34    0.00  1.0000
  -5   2 -15 3869874  254205                                                     3922844   -0.34    0.00  1.0000
  -5   2 -14     339   90732                                                      -33261   -0.47    0.00  1.0000
  -5   2 -14   83194   83333                                                       73234   -0.47    0.00  1.0000
  -5   2 -13 1894224  170954                                                     1837664   -0.53    0.00  1.0000
  -5   2 -13 2062935  199500                                                     2003892   -0.53    0.00  1.0000
  -5   2 -12 4598714  267419                                                     4687886   -0.53    0.00  1.0000
  -5   2 -12 4388847  241454                                                     4475970   -0.53    0.00  1.0000
  -5   2 -11 1729063  159669                                                     1679436   -0.49    0.00  1.0000
  -5   2 -11 1886364  154920                                                     1834513   -0.49    0.00  1.0000
  -5   2 -10 1974957  166251                                                     1925830   -0.45    0.00  1.0000
  -5   2 -10 2029979  149043                                                     1980169   -0.45    0.00  1.0000
  -5   2  -914063485  391683                                                    14205798   -0.48    0.00  1.0000
  -5   2  -914713533  362764                                                    14859088   -0.48    0.00  1.0000
  -5   2  -8 4568508  190553                                                     4462003   -0.64    0.00  1.0000
  -5   2  -8 4598704  213637                                                     4491846   -0.64    0.00  1.0000
  -5   2  -7 3016092  145822                                                     2889502   -0.93    0.00  1.0000
  -5   2  -7 3024480  165227                                                     2897713   -0.93    0.00  1.0000
  -5   2  -6 3340125  148598                                                     3526083   -1.30    0.00  1.0000
  -5   2  -6 3235586  164134                                                     3418648   -1.30    0.00  1.0000
  -5   2  -512247076  246037                                                    11800147   -1.65    0.00  1.0000
  -5   2  -512201981  276254                                                    11755882   -1.65    0.00  1.0000
  -5   2  -4 1623167   96279                                                     1813260   -1.84    0.00  1.0000
  -5   2  -4 1658034  106005                                                     1850101   -1.84    0.00  1.0000
  -5   2  -312350511  219031                                                    12854380   -1.81    0.00  1.0000
  -5   2  -312022572  236533                                                    12519772   -1.81    0.00  1.0000
  -5   2  -212817841  209753                                                    12388084   -1.55    0.00  1.0000
  -5   2  -1  860586   50359                                                      781880   -1.13    0.00  1.0000
  -5   2   0 6179394  104885                                                     6306272   -0.65    0.00  1.0000
  -5   3 -16  277472  111984                                                      284210    0.16    0.00  1.0000
  -5   3 -16  463878  144598                                                      472579    0.16    0.00  1.0000
  -5   3 -15 2562177  233142                                                     2525630    0.30    0.00  1.0000
  -5   3 -15 2518949  209946                                                     2482713    0.30    0.00  1.0000
  -5   3 -14 1487672  184603                                                     1524903    0.39    0.00  1.0000
  -5   3 -14 1371864  160684                                                     1407626    0.39    0.00  1.0000
  -5   3 -13   23308   80638                                                       28444    0.43    0.00  1.0000
  -5   3 -13   58432   98608                                                       66431    0.43    0.00  1.0000
  -5   3 -12 5743719  296432                                                     5668464    0.40    0.00  1.0000
  -5   3 -12 5933941  276734                                                     5857445    0.40    0.00  1.0000
  -5   3 -11 5986622  290167                                                     6052622    0.34    0.00  1.0000
  -5   3 -11 6055807  270579                                                     6122185    0.34    0.00  1.0000
  -5   3 -10  660157   98785                                                      640865    0.30    0.00  1.0000
  -5   3 -10  685624  115921                                                      665960    0.30    0.00  1.0000
  -5   3  -9 1663120  145828                                                     1629127    0.35    0.00  1.0000
  -5   3  -9 1647140  134345                                                     1613311    0.35    0.00  1.0000
  -5   3  -8 9732285  290670                                                     9860334    0.52    0.00  1.0000
  -5   3  -8 9811465  319363                                                     9940032    0.52    0.00  1.0000
  -5   3  -7 5197474  218372                                                     5048366    0.84    0.00  1.0000
  -5   3  -7 5032296  197400                                                     4885592    0.84    0.00  1.0000
  -5   3  -6 2779533  151625                                                     2622248    1.23    0.00  1.0000
  -5   3  -6 2898527  142386                                                     2737863    1.23    0.00  1.0000
  -5   3  -512096289  294160                                                    12531694    1.59    0.00  1.0000
  -5   3  -512024870  277948                                                    12458997    1.59    0.00  1.0000
  -5   3  -4 4296653  157326                                                     4010525    1.79    0.00  1.0000
  -5   3  -3  441295   56286                                                      355730    1.78    0.00  1.0000
  -5   3  -216456853  271891                                                    16947964    1.53    0.00  1.0000
  -5   3  -1 5351978  138629                                                     5150862    1.13    0.00  1.0000
  -5   4 -15 2457119  231908                                                     2487833   -0.25    0.00  1.0000
  -5   4 -15 2516227  226460                                                     2547307   -0.25    0.00  1.0000
  -5   4 -14 3593246  259095                                                     3550215   -0.29    0.00  1.0000
  -5   4 -14 3545390  243024                                                     3502648   -0.29    0.00  1.0000
  -5   4 -13   34594   84049                                                       36505   -0.27    0.00  1.0000
  -5   4 -13   84818   93234                                                       87845   -0.27    0.00  1.0000
  -5   4 -12 1761362  164306                                                     1781387   -0.19    0.00  1.0000
  -5   4 -12 1916819  187067                                                     1937707   -0.19    0.00  1.0000
  -5   4 -11 5092344  277957                                                     5077299   -0.09    0.00  1.0000
  -5   4 -11 4881370  248206                                                     4866641   -0.09    0.00  1.0000
  -5   4 -10 4236310  243993                                                     4237044    0.00    0.00  1.0000
  -5   4 -10 4045149  220608                                                     4045867    0.00    0.00  1.0000
  -5   4  -9       0   67727                                                      -26409   -0.01    0.00  1.0000
  -5   4  -9   90320   79935                                                       90445   -0.01    0.00  1.0000
  -5   4  -8 9172267  313147                                                     9133589   -0.16    0.00  1.0000
  -5   4  -8 8845539  291668                                                     8807557   -0.16    0.00  1.0000
  -5   4  -7 5302398  231270                                                     5383910   -0.45    0.00  1.0000
  -5   4  -7 4876683  212264                                                     4954868   -0.45    0.00  1.0000
  -5   4  -6  591047   87595                                                      641503   -0.82    0.00  1.0000
  -5   4  -6  588808   91263                                                      639170   -0.82    0.00  1.0000
  -5   4  -5 5344586  205119                                                     5140152   -1.15    0.00  1.0000
  -5   4  -417204410  352825                                                    17642080   -1.33    0.00  1.0000
  -5   4  -3 3603925  150295                                                     3410422   -1.31    0.00  1.0000
  -5   5 -15 1024793  155007                                                     1007616    0.22    0.00  1.0000
  -5   5 -15  878393  175785                                                      862495    0.22    0.00  1.0000
  -5   5 -14 1911990  194301                                                     1934450    0.21    0.00  1.0000
  -5   5 -14 1957956  209530                                                     1980684    0.21    0.00  1.0000
  -5   5 -13 2160133  196464                                                     2144275    0.14    0.00  1.0000
  -5   5 -13 2282950  214112                                                     2266647    0.14    0.00  1.0000
  -5   5 -12   51313   95883                                                       51146    0.01    0.00  1.0000
  -5   5 -12       0   81270                                                      -32212    0.01    0.00  1.0000
  -5   5 -11 4694048  266192                                                     4669677   -0.14    0.00  1.0000
  -5   5 -11 4339795  242865                                                     4316363   -0.14    0.00  1.0000
  -5   5 -10 7264587  307468                                                     7321556   -0.27    0.00  1.0000
  -5   5 -10 7647583  328997                                                     7706031   -0.27    0.00  1.0000
  -5   5  -9  346300  101722                                                      332515   -0.30    0.00  1.0000
  -5   5  -9  372286   91643                                                      357988   -0.30    0.00  1.0000
  -5   5  -8 6263024  263619                                                     6224863   -0.19    0.00  1.0000
  -5   5  -8 6479808  277720                                                     6440990   -0.19    0.00  1.0000
  -5   5  -7 5024808  228634                                                     5016977    0.05    0.00  1.0000
  -5   5  -7 4954644  233959                                                     4946869    0.05    0.00  1.0000
  -5   5  -6  564519   91782                                                      585202    0.35    0.00  1.0000
  -5   5  -5 3459875  185075                                                     3552366    0.63    0.00  1.0000
  -5   6 -14 1903571  208671                                                     1893442   -0.09    0.00  1.0000
  -5   6 -14 1696374  189790                                                     1686813   -0.09    0.00  1.0000
  -5   6 -13 3171813  258894                                                     3172193    0.00    0.00  1.0000
  -5   6 -13 3212045  242351                                                     3212428    0.00    0.00  1.0000
  -5   6 -12   37058   93811                                                       39088    0.14    0.00  1.0000
  -5   6 -12   47300   93843                                                       49590    0.14    0.00  1.0000
  -5   6 -11 1144299  149396                                                     1169694    0.30    0.00  1.0000
  -5   6 -11 1066002  150486                                                     1090517    0.30    0.00  1.0000
  -5   6 -10 5617445  291925                                                     5537140    0.44    0.00  1.0000
  -5   6 -10 5487866  283571                                                     5408497    0.44    0.00  1.0000
  -5   6  -9 2117030  185713                                                     2171179    0.47    0.00  1.0000
  -5   6  -9 2032331  182217                                                     2085392    0.47    0.00  1.0000
  -5   6  -8 1495445  160034                                                     1532447    0.38    0.00  1.0000
  -5   6  -7 6636994  285634                                                     6602294    0.17    0.00  1.0000
  -5   6  -6  160515   73422                                                      158262   -0.09    0.00  1.0000
  -5   7 -13 1288551  171032                                                     1301202   -0.15    0.00  1.0000
  -5   7 -13 1258321  183421                                                     1270822   -0.15    0.00  1.0000
  -5   7 -12 2944270  253825                                                     2907469   -0.27    0.00  1.0000
  -5   7 -12 3086535  244781                                                     3048852   -0.27    0.00  1.0000
  -5   7 -11  225022  110212                                                      209812   -0.41    0.00  1.0000
  -5   7 -11   95911   96319                                                       86073   -0.41    0.00  1.0000
  -5   7 -10 5812295  321426                                                     5909557   -0.51    0.00  1.0000
  -5   7 -10 5788152  308419                                                     5885213   -0.51    0.00  1.0000
  -5   7  -9 1741188  180293                                                     1688828   -0.52    0.00  1.0000
  -5   7  -8     255   85146                                                      -47719   -0.40    0.00  1.0000
  -5   7  -7 1516869  161433                                                     1535326   -0.19    0.00  1.0000
  -5   8 -12 2963225  252734                                                     3008662    0.34    0.00  1.0000
  -5   8 -12 2939531  259160                                                     2984788    0.34    0.00  1.0000
  -5   8 -11  105112  104366                                                       94322    0.45    0.00  1.0000
  -5   8 -11   75905   90750                                                       66776    0.45    0.00  1.0000
  -5   8 -10  707840  142780                                                      674709    0.51    0.00  1.0000
  -5   8 -10  879653  150849                                                      842675    0.51    0.00  1.0000
  -5   8  -9 3308585  253229                                                     3377171    0.48    0.00  1.0000
  -5   8  -8 2816447  228096                                                     2771357    0.34    0.00  1.0000
  -5   9 -11 1207003  185275                                                     1238913   -0.37    0.00  1.0000
  -5   9 -11 1364969  197824                                                     1398890   -0.37    0.00  1.0000
  -5   9 -10    1631  106769                                                         573   -0.42    0.00  1.0000
  -5   9  -9 2458394  239112                                                     2412680   -0.38    0.00  1.0000
  -5  10  -9  154138  114183                                                      160572    0.22    0.00  1.0000
  -4 -10  -3   34513  113519                                                       37134   -0.18    0.00  1.0000
  -4 -10  -3      49   91761                                                      -28170   -0.18    0.00  1.0000
  -4 -10  -2 1233573  165085                                                     1217103   -0.19    0.00  1.0000
  -4 -10  -2 1197488  191142                                                     1181261   -0.19    0.00  1.0000
  -4 -10  -1 1134628  162060                                                     1146027   -0.14    0.00  1.0000
  -4 -10  -1 1050089  168949                                                     1061056   -0.14    0.00  1.0000
  -4 -10   0  495604  118137                                                      493717   -0.03    0.00  1.0000
  -4 -10   0  469462  142129                                                      467625   -0.03    0.00  1.0000
  -4 -10   1  582584  151557                                                      587623    0.09    0.00  1.0000
  -4 -10   1  636201  131551                                                      641466    0.09    0.00  1.0000
  -4 -10   2 2753093  240523                                                     2730062    0.18    0.00  1.0000
  -4 -10   3  309295  121043                                                      318630    0.22    0.00  1.0000
  -4 -10   4  130049  103435                                                      135650    0.20    0.00  1.0000
  -4 -10   5  991456  162869                                                      980491    0.14    0.00  1.0000
  -4 -10   6  839604  156094                                                      845665    0.09    0.00  1.0000
  -4 -10   7    7667  104774                                                        7347    0.05    0.00  1.0000
  -4  -9  -7 1356777  173758                                                     1377873   -0.23    0.00  1.0000
  -4  -9  -7 1443481  201740                                                     1465238   -0.23    0.00  1.0000
  -4  -9  -6    4731   80901                                                        4245   -0.15    0.00  1.0000
  -4  -9  -6   76981  103606                                                       75045   -0.15    0.00  1.0000
  -4  -9  -5  540628  120524                                                      539771   -0.02    0.00  1.0000
  -4  -9  -5  553356  150667                                                      552490   -0.02    0.00  1.0000
  -4  -9  -4 3167746  235492                                                     3152076    0.11    0.00  1.0000
  -4  -9  -4 3595102  276751                                                     3578407    0.11    0.00  1.0000
  -4  -9  -3  542828  143140                                                      553623    0.19    0.00  1.0000
  -4  -9  -3  378880  113281                                                      387908    0.19    0.00  1.0000
  -4  -9  -2  932128  166920                                                      945394    0.17    0.00  1.0000
  -4  -9  -2  758889  135670                                                      770864    0.17    0.00  1.0000
  -4  -9  -1 3959261  285998                                                     3948006    0.07    0.00  1.0000
  -4  -9  -1 4334942  273482                                                     4323165    0.07    0.00  1.0000
  -4  -9   0  930552  137904                                                      923845   -0.09    0.00  1.0000
  -4  -9   0 1023243  158941                                                     1016210   -0.09    0.00  1.0000
  -4  -9   1  174634   90247                                                      166221   -0.26    0.00  1.0000
  -4  -9   1  224076  101465                                                      214532   -0.26    0.00  1.0000
  -4  -9   2 2335805  225077                                                     2381686   -0.38    0.00  1.0000
  -4  -9   2 2539004  209907                                                     2586830   -0.38    0.00  1.0000
  -4  -9   3 1832374  189072                                                     1787567   -0.43    0.00  1.0000
  -4  -9   4   78499   96754                                                       87475   -0.40    0.00  1.0000
  -4  -9   5 1566502  185743                                                     1597299   -0.31    0.00  1.0000
  -4  -9   6 1823935  194051                                                     1800626   -0.22    0.00  1.0000
  -4  -9   7  232540  114954                                                      238394   -0.15    0.00  1.0000
  -4  -9   8  689420  146956                                                      697000   -0.12    0.00  1.0000
  -4  -9   9 1965153  205514                                                     1953931   -0.10    0.00  1.0000
  -4  -9  10  862229  159591                                                      869662   -0.10    0.00  1.0000
  -4  -8  -9  292722  130692                                                      306891    0.33    0.00  1.0000
  -4  -8  -9  454628  117638                                                      472247    0.33    0.00  1.0000
  -4  -8  -8  509820  121645                                                      531797    0.39    0.00  1.0000
  -4  -8  -8  490972  143114                                                      512543    0.39    0.00  1.0000
  -4  -8  -7 1414986  166245                                                     1382354    0.36    0.00  1.0000
  -4  -8  -7 1571160  195702                                                     1536765    0.36    0.00  1.0000
  -4  -8  -6 1798437  184007                                                     1823546    0.24    0.00  1.0000
  -4  -8  -6 2138399  216312                                                     2165771    0.24    0.00  1.0000
  -4  -8  -5   97272  102442                                                       99096    0.08    0.00  1.0000
  -4  -8  -5       9   86671                                                      -47181    0.08    0.00  1.0000
  -4  -8  -4 3183658  225630                                                     3192947   -0.07    0.00  1.0000
  -4  -8  -4 3236314  250095                                                     3245680   -0.07    0.00  1.0000
  -4  -8  -3 4772024  265220                                                     4750496   -0.13    0.00  1.0000
  -4  -8  -3 4294307  277065                                                     4273886   -0.13    0.00  1.0000
  -4  -8  -2       8  100886                                                      -74111   -0.07    0.00  1.0000
  -4  -8  -2       8   83672                                                      -16507   -0.07    0.00  1.0000
  -4  -8  -1 5479304  282385                                                     5462623    0.09    0.00  1.0000
  -4  -8  -1 5204506  295104                                                     5188249    0.09    0.00  1.0000
  -4  -8   0 5945020  297153                                                     6004282    0.31    0.00  1.0000
  -4  -8   0 5730831  310198                                                     5789018    0.31    0.00  1.0000
  -4  -8   1  309576  112866                                                      287541    0.52    0.00  1.0000
  -4  -8   1  321249   93301                                                      298795    0.52    0.00  1.0000
  -4  -8   2 1639232  159236                                                     1574970    0.65    0.00  1.0000
  -4  -8   2 1485076  165882                                                     1423940    0.65    0.00  1.0000
  -4  -8   3 4437615  270157                                                     4549654    0.68    0.00  1.0000
  -4  -8   4 1225744  160509                                                     1173830    0.61    0.00  1.0000
  -4  -8   5 1462321  166567                                                     1416670    0.48    0.00  1.0000
  -4  -8   6 2797835  222565                                                     2843829    0.35    0.00  1.0000
  -4  -8   7 3169939  234392                                                     3135457    0.25    0.00  1.0000
  -4  -8   8  326661  110010                                                      318327    0.19    0.00  1.0000
  -4  -8   9 3830239  261476                                                     3855265    0.16    0.00  1.0000
  -4  -8  10 2293011  211937                                                     2273175    0.17    0.00  1.0000
  -4  -8  11      59  103384                                                      -33531    0.19    0.00  1.0000
  -4  -8  12  657093  141295                                                      671691    0.23    0.00  1.0000
  -4  -7 -11   88089  104546                                                       83561   -0.20    0.00  1.0000
  -4  -7 -11  104424   88332                                                       99489   -0.20    0.00  1.0000
  -4  -7 -10 1670847  184398                                                     1708339   -0.37    0.00  1.0000
  -4  -7 -10 2016801  220922                                                     2057972   -0.37    0.00  1.0000
  -4  -7  -9  973293  159575                                                      934196   -0.52    0.00  1.0000
  -4  -7  -9 1141450  151107                                                     1099080   -0.52    0.00  1.0000
  -4  -7  -8  487252  130446                                                      520078   -0.59    0.00  1.0000
  -4  -7  -8  498328  111989                                                      531518   -0.59    0.00  1.0000
  -4  -7  -7 1428808  177354                                                     1478592   -0.54    0.00  1.0000
  -4  -7  -7 1408022  158323                                                     1457446   -0.54    0.00  1.0000
  -4  -7  -6 8017393  326683                                                     7931006   -0.39    0.00  1.0000
  -4  -7  -6 8304606  367316                                                     8216681   -0.39    0.00  1.0000
  -4  -7  -5  178192  104686                                                      171617   -0.21    0.00  1.0000
  -4  -7  -5   87996   82025                                                       83392   -0.21    0.00  1.0000
  -4  -7  -4 2007648  189559                                                     2015238   -0.07    0.00  1.0000
  -4  -7  -4 2050060  176999                                                     2057730   -0.07    0.00  1.0000
  -4  -7  -3 1544648  151939                                                     1540809   -0.04    0.00  1.0000
  -4  -7  -3 1721572  174748                                                     1717520   -0.04    0.00  1.0000
  -4  -7  -2 1412177  146011                                                     1426123   -0.15    0.00  1.0000
  -4  -7  -2 1530926  163603                                                     1545445   -0.15    0.00  1.0000
  -4  -7  -1   76507   72871                                                       68967   -0.37    0.00  1.0000
  -4  -7  -1   76868   83519                                                       69309   -0.37    0.00  1.0000
  -4  -7   0 6969756  314480                                                     6839190   -0.64    0.00  1.0000
  -4  -7   0 6344577  276833                                                     6220031   -0.64    0.00  1.0000
  -4  -7   1 3861325  222076                                                     3994604   -0.86    0.00  1.0000
  -4  -7   1 3915288  245105                                                     4049487   -0.86    0.00  1.0000
  -4  -7   2  347140  106584                                                      393883   -0.98    0.00  1.0000
  -4  -7   2  348574   93312                                                      395410   -0.98    0.00  1.0000
  -4  -7   3 2354569  184734                                                     2241666   -0.96    0.00  1.0000
  -4  -7   4 1996448  178749                                                     2088376   -0.84    0.00  1.0000
  -4  -7   5  454228  105079                                                      420432   -0.65    0.00  1.0000
  -4  -7   6 5776414  285901                                                     5689900   -0.46    0.00  1.0000
  -4  -7   7 5122702  271575                                                     5177357   -0.31    0.00  1.0000
  -4  -7   8  209019   98523                                                      201612   -0.21    0.00  1.0000
  -4  -7   9 1440100  162523                                                     1423361   -0.18    0.00  1.0000
  -4  -7  10 1723788  183124                                                     1743681   -0.20    0.00  1.0000
  -4  -7  11 1552311  179794                                                     1527888   -0.25    0.00  1.0000
  -4  -7  12     166  106358                                                        -734   -0.33    0.00  1.0000
  -4  -7  13 2522051  229843                                                     2570803   -0.39    0.00  1.0000
  -4  -7  14 1061178  172202                                                     1027826   -0.42    0.00  1.0000
  -4  -6 -12 2030786  198820                                                     2051443    0.19    0.00  1.0000
  -4  -6 -12 2558680  246814                                                     2581862    0.19    0.00  1.0000
  -4  -6 -11     236   81885                                                      -46748    0.39    0.00  1.0000
  -4  -6 -11     236  112818                                                      -85261    0.39    0.00  1.0000
  -4  -6 -10  785436  144612                                                      744466    0.61    0.00  1.0000
  -4  -6 -10  723000  117164                                                      683713    0.61    0.00  1.0000
  -4  -6  -9 4279140  251336                                                     4405725    0.78    0.00  1.0000
  -4  -6  -9 4261958  283665                                                     4388289    0.78    0.00  1.0000
  -4  -6  -8 1935228  169861                                                     1844572    0.84    0.00  1.0000
  -4  -6  -8 2128422  199356                                                     2033295    0.84    0.00  1.0000
  -4  -6  -7 1401809  147689                                                     1331190    0.77    0.00  1.0000
  -4  -6  -7 1612619  168963                                                     1536810    0.77    0.00  1.0000
  -4  -6  -6 7213200  292160                                                     7340447    0.60    0.00  1.0000
  -4  -6  -6 7474362  333801                                                     7603883    0.60    0.00  1.0000
  -4  -6  -5 1681606  168074                                                     1640534    0.41    0.00  1.0000
  -4  -6  -5 1654167  150135                                                     1613433    0.41    0.00  1.0000
  -4  -6  -4   86855   86922                                                       80315    0.29    0.00  1.0000
  -4  -6  -4  126414   69819                                                      118498    0.29    0.00  1.0000
  -4  -6  -3 3362835  212501                                                     3406499    0.31    0.00  1.0000
  -4  -6  -3 3235659  192206                                                     3278492    0.31    0.00  1.0000
  -4  -6  -2 2557146  169162                                                     2498513    0.48    0.00  1.0000
  -4  -6  -2 2600070  190133                                                     2540945    0.48    0.00  1.0000
  -4  -6  -1     899   71417                                                      -54718    0.76    0.00  1.0000
  -4  -6  -1     899   72039                                                      -67392    0.76    0.00  1.0000
  -4  -6   0 1693983  160787                                                     1802140    1.06    0.00  1.0000
  -4  -6   0 1649652  144106                                                     1756406    1.06    0.00  1.0000
  -4  -6   1 4291836  206889                                                     4086208    1.30    0.00  1.0000
  -4  -6   1 4139562  221814                                                     3937659    1.30    0.00  1.0000
  -4  -6   2  895985  113313                                                     1001519    1.39    0.00  1.0000
  -4  -6   2  877508  121998                                                      981978    1.39    0.00  1.0000
  -4  -6   3 1209146  136570                                                     1324835    1.32    0.00  1.0000
  -4  -6   4 6642240  272671                                                     6416645    1.13    0.00  1.0000
  -4  -6   5 2811897  191968                                                     2927874    0.87    0.00  1.0000
  -4  -6   6 4558531  238034                                                     4662103    0.61    0.00  1.0000
  -4  -6   7  913882  121469                                                      886209    0.39    0.00  1.0000
  -4  -6   8 1898446  172112                                                     1924891    0.25    0.00  1.0000
  -4  -6   9  400423   97490                                                      391330    0.18    0.00  1.0000
  -4  -6  10 2171289  196617                                                     2148668    0.20    0.00  1.0000
  -4  -6  11 3968723  254785                                                     4011252    0.27    0.00  1.0000
  -4  -6  12   48574   96133                                                       44263    0.37    0.00  1.0000
  -4  -6  13 1319742  166183                                                     1279188    0.46    0.00  1.0000
  -4  -6  14 2568482  232603                                                     2629323    0.49    0.00  1.0000
  -4  -6  15  428107  133557                                                      405859    0.45    0.00  1.0000
  -4  -5 -13  597266  127763                                                      607890   -0.18    0.00  1.0000
  -4  -5 -13  640955  144679                                                      651960   -0.18    0.00  1.0000
  -4  -5 -12 4519107  270031                                                     4458322   -0.37    0.00  1.0000
  -4  -5 -12 5115581  313064                                                     5050895   -0.37    0.00  1.0000
  -4  -5 -11 1969129  180503                                                     2036522   -0.61    0.00  1.0000
  -4  -5 -11 2037139  206747                                                     2105676   -0.61    0.00  1.0000
  -4  -5 -10  754824  143262                                                      814454   -0.86    0.00  1.0000
  -4  -5 -10  748494  123242                                                      807878   -0.86    0.00  1.0000
  -4  -5  -9 3912181  244625                                                     3754981   -1.03    0.00  1.0000
  -4  -5  -9 3841511  219940                                                     3685751   -1.03    0.00  1.0000
  -4  -5  -8 4541043  238308                                                     4723304   -1.08    0.00  1.0000
  -4  -5  -8 4587388  266380                                                     4770568   -1.08    0.00  1.0000
  -4  -5  -7    1555   74635                                                      -67971   -1.00    0.00  1.0000
  -4  -5  -7    1555   86200                                                       -4573   -1.00    0.00  1.0000
  -4  -5  -6 4337623  235905                                                     4205035   -0.82    0.00  1.0000
  -4  -5  -6 3847081  196607                                                     3722274   -0.82    0.00  1.0000
  -4  -5  -510334383  352860                                                    10497430   -0.64    0.00  1.0000
  -4  -5  -5 9906377  305523                                                    10066024   -0.64    0.00  1.0000
  -4  -5  -4  419164   77450                                                      391242   -0.57    0.00  1.0000
  -4  -5  -4  423060   94555                                                      395007   -0.57    0.00  1.0000
  -4  -5  -3 3451804  176106                                                     3357705   -0.65    0.00  1.0000
  -4  -5  -3 3560384  199171                                                     3464806   -0.65    0.00  1.0000
  -4  -5  -2 3247058  192744                                                     3373550   -0.90    0.00  1.0000
  -4  -5  -2 3194198  173280                                                     3319666   -0.90    0.00  1.0000
  -4  -5  -1 2059060  151150                                                     1920770   -1.26    0.00  1.0000
  -4  -5  -1 1996180  132703                                                     1860054   -1.26    0.00  1.0000
  -4  -5   0  538655   79678                                                      450763   -1.62    0.00  1.0000
  -4  -5   0  449461   88178                                                      369501   -1.62    0.00  1.0000
  -4  -5   112285847  355559                                                    12804282   -1.87    0.00  1.0000
  -4  -5   112254016  317650                                                    12771787   -1.87    0.00  1.0000
  -4  -5   2 8089847  273203                                                     7661555   -1.95    0.00  1.0000
  -4  -5   2 8101770  248005                                                     7673159   -1.95    0.00  1.0000
  -4  -5   3    5311   72952                                                      -33507   -1.85    0.00  1.0000
  -4  -5   4 4419887  215264                                                     4686053   -1.60    0.00  1.0000
  -4  -5   5 5004003  217678                                                     4784853   -1.27    0.00  1.0000
  -4  -5   6  847648  114530                                                      916572   -0.93    0.00  1.0000
  -4  -5   7 1369031  132309                                                     1426898   -0.64    0.00  1.0000
  -4  -5   8 4268985  219634                                                     4201490   -0.42    0.00  1.0000
  -4  -5   9 2400785  178578                                                     2438827   -0.31    0.00  1.0000
  -4  -5  10 1007703  132129                                                     1031560   -0.30    0.00  1.0000
  -4  -5  11 3271441  221167                                                     3219563   -0.37    0.00  1.0000
  -4  -5  12 2153045  188525                                                     2206945   -0.47    0.00  1.0000
  -4  -5  13  102272   92651                                                      116153   -0.54    0.00  1.0000
  -4  -4 -14 2483265  214806                                                     2467261    0.13    0.00  1.0000
  -4  -4 -14 2525971  235333                                                     2509829    0.13    0.00  1.0000
  -4  -4 -13   84221  103307                                                       78181    0.27    0.00  1.0000
  -4  -4 -13   63656   81807                                                       58420    0.27    0.00  1.0000
  -4  -4 -12 2951785  237602                                                     3015601    0.47    0.00  1.0000
  -4  -4 -12 2781149  207851                                                     2843102    0.47    0.00  1.0000
  -4  -4 -11 4897454  255119                                                     4772325    0.73    0.00  1.0000
  -4  -4 -11 5344694  292960                                                     5213941    0.73    0.00  1.0000
  -4  -4 -10    1496  100936                                                      -33774    0.98    0.00  1.0000
  -4  -4 -10   80282   77377                                                      101948    0.98    0.00  1.0000
  -4  -4  -9  568658  103297                                                      637362    1.16    0.00  1.0000
  -4  -4  -9  661609  129729                                                      735573    1.16    0.00  1.0000
  -4  -4  -810742010  366042                                                    10432427    1.21    0.00  1.0000
  -4  -4  -810828936  323985                                                    10518093    1.21    0.00  1.0000
  -4  -4  -7 3591932  189606                                                     3764024    1.14    0.00  1.0000
  -4  -4  -7 3660189  217586                                                     3833890    1.14    0.00  1.0000
  -4  -4  -6 2022405  141364                                                     2135868    1.00    0.00  1.0000
  -4  -4  -6 2239111  172167                                                     2358418    1.00    0.00  1.0000
  -4  -4  -512003275  300603                                                    11763684    0.89    0.00  1.0000
  -4  -4  -512072087  343736                                                    11831808    0.89    0.00  1.0000
  -4  -4  -4 2327608  160230                                                     2434495    0.90    0.00  1.0000
  -4  -4  -4 2119470  136738                                                     2221518    0.90    0.00  1.0000
  -4  -4  -3    1862   61461                                                      -20996    1.09    0.00  1.0000
  -4  -4  -3    1862   53870                                                      -34241    1.09    0.00  1.0000
  -4  -4  -2 6542948  208859                                                     6255191    1.46    0.00  1.0000
  -4  -4  -2 6239200  227192                                                     5958275    1.46    0.00  1.0000
  -4  -4  -113284732  301256                                                    13837577    1.91    0.00  1.0000
  -4  -4  -112818877  329217                                                    13362042    1.91    0.00  1.0000
  -4  -4   0    4654   53999                                                       24276    2.34    0.00  1.0000
  -4  -4   0   48389   59967                                                       95787    2.34    0.00  1.0000
  -4  -4   110549878  248659                                                     9889495    2.63    0.00  1.0000
  -4  -4   111118095  288359                                                    10439880    2.63    0.00  1.0000
  -4  -4   211234148  305212                                                    11958845    2.72    0.00  1.0000
  -4  -4   3 7148581  228304                                                     6612959    2.59    0.00  1.0000
  -4  -4   4 1550623  111301                                                     1336151    2.30    0.00  1.0000
  -4  -4   511672678  306938                                                    12188181    1.91    0.00  1.0000
  -4  -4   6 5570121  213840                                                     5299077    1.48    0.00  1.0000
  -4  -4   7  692172   90310                                                      622373    1.10    0.00  1.0000
  -4  -4   8 4720724  218107                                                     4858673    0.81    0.00  1.0000
  -4  -4   9 6349280  258739                                                     6222984    0.64    0.00  1.0000
  -4  -4  10  306718   91324                                                      333533    0.60    0.00  1.0000
  -4  -4  11 4486957  241872                                                     4594524    0.65    0.00  1.0000
  -4  -4  12 6838908  310048                                                     6692550    0.72    0.00  1.0000
  -4  -3 -15  931921  165817                                                      925660   -0.08    0.00  1.0000
  -4  -3 -15 1121397  159374                                                     1114528   -0.08    0.00  1.0000
  -4  -3 -14 2919066  256880                                                     2937448   -0.14    0.00  1.0000
  -4  -3 -14 3090881  234581                                                     3109795   -0.14    0.00  1.0000
  -4  -3 -13  503415  129592                                                      489782   -0.25    0.00  1.0000
  -4  -3 -13  514635  116940                                                      500849   -0.25    0.00  1.0000
  -4  -3 -12  291208  105695                                                      273414   -0.44    0.00  1.0000
  -4  -3 -12  395113   93439                                                      374342   -0.44    0.00  1.0000
  -4  -3 -11 8132054  351722                                                     8284441   -0.68    0.00  1.0000
  -4  -3 -11 7470314  302498                                                     7616397   -0.68    0.00  1.0000
  -4  -3 -10 6183902  291401                                                     6004448   -0.93    0.00  1.0000
  -4  -3 -10 6165669  257715                                                     5986482   -0.93    0.00  1.0000
  -4  -3  -9 1272657  135083                                                     1175463   -1.12    0.00  1.0000
  -4  -3  -9 1074428  115673                                                      985279   -1.12    0.00  1.0000
  -4  -3  -8 2927497  196684                                                     3087497   -1.20    0.00  1.0000
  -4  -3  -8 2868001  169568                                                     3026386   -1.20    0.00  1.0000
  -4  -3  -7 5720725  212140                                                     5503419   -1.18    0.00  1.0000
  -4  -3  -7 5865286  246693                                                     5645226   -1.18    0.00  1.0000
  -4  -3  -6  948956   94700                                                     1036120   -1.11    0.00  1.0000
  -4  -3  -6  836333  110079                                                      918278   -1.11    0.00  1.0000
  -4  -3  -5 4527923  176186                                                     4712079   -1.10    0.00  1.0000
  -4  -3  -5 4658945  208663                                                     4845721   -1.10    0.00  1.0000
  -4  -3  -4 9201929  263852                                                     8911963   -1.23    0.00  1.0000
  -4  -3  -4 9284587  227719                                                     8993311   -1.23    0.00  1.0000
  -4  -3  -3 3865992  151825                                                     4111597   -1.56    0.00  1.0000
  -4  -3  -3 3857354  177287                                                     4102690   -1.56    0.00  1.0000
  -4  -3  -2 7624272  205431                                                     8077600   -2.06    0.00  1.0000
  -4  -3  -2 7355761  230964                                                     7801150   -2.06    0.00  1.0000
  -4  -3  -110542406  252080                                                     9888420   -2.62    0.00  1.0000
  -4  -3  -1 9990535  216786                                                     9354169   -2.62    0.00  1.0000
  -4  -3   0 7223357  224024                                                     7897830   -3.13    0.00  1.0000
  -4  -3   0 6890336  190715                                                     7549423   -3.13    0.00  1.0000
  -4  -3   1 4369275  178681                                                     4957867   -3.46    0.00  1.0000
  -4  -3   1 4302964  149908                                                     4887213   -3.46    0.00  1.0000
  -4  -3   219655604  330805                                                    18437086   -3.56    0.00  1.0000
  -4  -3   318838298  341030                                                    20020432   -3.41    0.00  1.0000
  -4  -3   4   62688   56995                                                      137836   -3.06    0.00  1.0000
  -4  -3   5 6111470  189552                                                     5621685   -2.59    0.00  1.0000
  -4  -3   6 7409181  232227                                                     7856883   -2.08    0.00  1.0000
  -4  -3   7 1016968   94894                                                      894265   -1.60    0.00  1.0000
  -4  -3   8 4996332  204114                                                     4781611   -1.24    0.00  1.0000
  -4  -3   912369006  341645                                                    12652824   -1.02    0.00  1.0000
  -4  -3  10 2477938  168657                                                     2362053   -0.95    0.00  1.0000
  -4  -2 -16 1345284  192253                                                     1354051    0.10    0.00  1.0000
  -4  -2 -16 1095270  162122                                                     1103182    0.10    0.00  1.0000
  -4  -2 -15       9  112582                                                     -104547    0.08    0.00  1.0000
  -4  -2 -15  143030   95416                                                      144666    0.08    0.00  1.0000
  -4  -2 -14 3519932  238628                                                     3507783    0.08    0.00  1.0000
  -4  -2 -14 3440824  260684                                                     3428813    0.08    0.00  1.0000
  -4  -2 -13 4467076  253467                                                     4492255    0.15    0.00  1.0000
  -4  -2 -13 4456775  283630                                                     4481924    0.15    0.00  1.0000
  -4  -2 -12     143   75316                                                      -21603    0.30    0.00  1.0000
  -4  -2 -12   17162   91563                                                       14682    0.30    0.00  1.0000
  -4  -2 -11 2928488  203889                                                     2859932    0.52    0.00  1.0000
  -4  -2 -11 2640518  178866                                                     2575439    0.52    0.00  1.0000
  -4  -2 -10 9894228  319220                                                    10080976    0.75    0.00  1.0000
  -4  -2 -1010121504  363553                                                    10310373    0.75    0.00  1.0000
  -4  -2  -9 1206243  133023                                                     1126461    0.94    0.00  1.0000
  -4  -2  -9 1271731  116895                                                     1189777    0.94    0.00  1.0000
  -4  -2  -8  909967   93799                                                      835585    1.05    0.00  1.0000
  -4  -2  -8  819633  109403                                                      749115    1.05    0.00  1.0000
  -4  -2  -713969930  364697                                                    14283011    1.06    0.00  1.0000
  -4  -2  -714280043  318325                                                    14596561    1.06    0.00  1.0000
  -4  -2  -6 3147203  165096                                                     3002770    1.06    0.00  1.0000
  -4  -2  -6 2987026  135461                                                     2846359    1.06    0.00  1.0000
  -4  -2  -5 1736187  117479                                                     1622249    1.12    0.00  1.0000
  -4  -2  -5 1778788   99449                                                     1663438    1.12    0.00  1.0000
  -4  -2  -413679449  302457                                                    14072746    1.35    0.00  1.0000
  -4  -2  -413484804  250630                                                    13875313    1.35    0.00  1.0000
  -4  -2  -316079124  245086                                                    15525496    1.77    0.00  1.0000
  -4  -2  -316554042  304273                                                    15992229    1.77    0.00  1.0000
  -4  -2  -2  241907   47749                                                      342065    2.36    0.00  1.0000
  -4  -2  -2  254180   59974                                                      356630    2.36    0.00  1.0000
  -4  -2  -118295692  249224                                                    19316924    3.00    0.00  1.0000
  -4  -2  -118416144  304305                                                    19440690    3.00    0.00  1.0000
  -4  -2   022779752  310545                                                    21464562    3.56    0.00  1.0000
  -4  -2   022057338  240648                                                    20763478    3.56    0.00  1.0000
  -4  -2   1    8097   46276                                                       25723    3.93    0.00  1.0000
  -4  -2   211804747  231839                                                    12918897    4.03    0.00  1.0000
  -4  -2   311469367  209812                                                    10469238    3.87    0.00  1.0000
  -4  -2   4 6029795  175486                                                     6719363    3.48    0.00  1.0000
  -4  -2   5 1305674   96274                                                     1579666    2.94    0.00  1.0000
  -4  -2   612084993  254981                                                    11455165    2.35    0.00  1.0000
  -4  -2   7 1069856   98142                                                     1216034    1.81    0.00  1.0000
  -4  -2   8  396938   76902                                                      468686    1.39    0.00  1.0000
  -4  -1 -16 4124962  266869                                                     4115400   -0.06    0.00  1.0000
  -4  -1 -16 4028837  293046                                                     4019387   -0.06    0.00  1.0000
  -4  -1 -15  537758  121776                                                      537446    0.01    0.00  1.0000
  -4  -1 -15  472623  131900                                                      472330    0.01    0.00  1.0000
  -4  -1 -14 1823898  174492                                                     1819440    0.04    0.00  1.0000
  -4  -1 -14 1699190  192257                                                     1694887    0.04    0.00  1.0000
  -4  -1 -13 3641108  220682                                                     3642638    0.01    0.00  1.0000
  -4  -1 -13 3065385  236348                                                     3066788    0.01    0.00  1.0000
  -4  -1 -12  315602   93345                                                      320095   -0.11    0.00  1.0000
  -4  -1 -12  214153   93225                                                      217856   -0.11    0.00  1.0000
  -4  -1 -11  723248  123370                                                      743122   -0.30    0.00  1.0000
  -4  -1 -11  618179  105903                                                      636562   -0.30    0.00  1.0000
  -4  -1 -10 4393899  229525                                                     4312227   -0.51    0.00  1.0000
  -4  -1 -10 4470614  208391                                                     4388229   -0.51    0.00  1.0000
  -4  -1  -9 5070520  242341                                                     5188582   -0.67    0.00  1.0000
  -4  -1  -9 5169183  214096                                                     5288382   -0.67    0.00  1.0000
  -4  -1  -8  532370   82008                                                      575755   -0.74    0.00  1.0000
  -4  -1  -8  445166   91817                                                      484911   -0.74    0.00  1.0000
  -4  -1  -7 4773077  174535                                                     4650181   -0.73    0.00  1.0000
  -4  -1  -7 5009745  208188                                                     4883820   -0.73    0.00  1.0000
  -4  -1  -6 9807232  273502                                                     9978601   -0.70    0.00  1.0000
  -4  -1  -6 9844386  233151                                                    10016079   -0.70    0.00  1.0000
  -4  -1  -5 1650996   91390                                                     1576788   -0.74    0.00  1.0000
  -4  -1  -5 1839232  116648                                                     1760860   -0.74    0.00  1.0000
  -4  -1  -4 9958389  236005                                                     9723087   -0.96    0.00  1.0000
  -4  -1  -4 9837025  190442                                                     9603169   -0.96    0.00  1.0000
  -4  -1  -323168898  258872                                                    23692490   -1.38    0.00  1.0000
  -4  -1  -323896258  338781                                                    24427960   -1.38    0.00  1.0000
  -4  -1  -2 5807871  108488                                                     5440885   -1.97    0.00  1.0000
  -4  -1  -2 5882754  150597                                                     5513372   -1.97    0.00  1.0000
  -4  -1  -1 2104622   85108                                                     1819349   -2.62    0.00  1.0000
  -4  -1  -1 1972481   54399                                                     1696629   -2.62    0.00  1.0000
  -4  -1   0 7764817  160730                                                     8474815   -3.21    0.00  1.0000
  -4  -1   112800496  180090                                                    11808282   -3.60    0.00  1.0000
  -4  -1   2 2088941   68324                                                     1686343   -3.73    0.00  1.0000
  -4  -1   313165726  192585                                                    14201086   -3.58    0.00  1.0000
  -4  -1   414406091  206703                                                    13473250   -3.19    0.00  1.0000
  -4  -1   5  467347   49923                                                      335764   -2.64    0.00  1.0000
  -4  -1   6 8874794  218018                                                     9357184   -2.04    0.00  1.0000
  -4   0 -17  597275  149205                                                      597288    0.00    0.00  1.0000
  -4   0 -17  594515  128363                                                      594528    0.00    0.00  1.0000
  -4   0 -16 2699011  220020                                                     2686494   -0.10    0.00  1.0000
  -4   0 -16 2823395  251646                                                     2810593   -0.10    0.00  1.0000
  -4   0 -15 1977839  192600                                                     2000225   -0.20    0.00  1.0000
  -4   0 -15 1761333  202555                                                     1782462   -0.20    0.00  1.0000
  -4   0 -14   63559  101374                                                       58301   -0.27    0.00  1.0000
  -4   0 -14  165318   93915                                                      156770   -0.27    0.00  1.0000
  -4   0 -13 3947065  231815                                                     3906468   -0.26    0.00  1.0000
  -4   0 -13 3720008  251896                                                     3680600   -0.26    0.00  1.0000
  -4   0 -12 6269068  274698                                                     6301531   -0.17    0.00  1.0000
  -4   0 -12 6761019  310817                                                     6794728   -0.17    0.00  1.0000
  -4   0 -11  520545  116062                                                      520872   -0.01    0.00  1.0000
  -4   0 -11  633537  109554                                                      633896   -0.01    0.00  1.0000
  -4   0 -1012341028  376434                                                    12384479    0.16    0.00  1.0000
  -4   0 -1011997248  334580                                                    12040088    0.16    0.00  1.0000
  -4   0  -9 5130913  235830                                                     5086207    0.26    0.00  1.0000
  -4   0  -9 5154360  209515                                                     5109551    0.26    0.00  1.0000
  -4   0  -8  686277  101075                                                      701955    0.24    0.00  1.0000
  -4   0  -8  727319   86083                                                      743457    0.24    0.00  1.0000
  -4   0  -7 2748453  155823                                                     2765631    0.13    0.00  1.0000
  -4   0  -7 2827165  138054                                                     2844586    0.13    0.00  1.0000
  -4   0  -619245320  316182                                                    19249362   -0.01    0.00  1.0000
  -4   0  -619408152  368258                                                    19412210   -0.01    0.00  1.0000
  -4   0  -5 2811152  135514                                                     2800700   -0.08    0.00  1.0000
  -4   0  -5 2749639  114615                                                     2739303   -0.08    0.00  1.0000
  -4   0  -4 8900140  176474                                                     8906706    0.03    0.00  1.0000
  -4   0  -4 9171627  219224                                                     9178292    0.03    0.00  1.0000
  -4   0  -314643296  191039                                                    14534799    0.36    0.00  1.0000
  -4   0  -314953143  245595                                                    14843500    0.36    0.00  1.0000
  -4   0  -2 5875823   97490                                                     6045729    0.89    0.00  1.0000
  -4   0  -2 6284477  143551                                                     6460153    0.89    0.00  1.0000
  -4   0  -1 1305576   56317                                                     1171969    1.52    0.00  1.0000
  -4   0   0 8520086  113756                                                     8046545    2.11    0.00  1.0000
  -4   1 -17      39  116016                                                      -66092    0.16    0.00  1.0000
  -4   1 -17   93477  102229                                                       97295    0.16    0.00  1.0000
  -4   1 -16  918917  144790                                                      941537    0.31    0.00  1.0000
  -4   1 -16  964763  163862                                                      987938    0.31    0.00  1.0000
  -4   1 -15 5327676  294673                                                     5246511    0.45    0.00  1.0000
  -4   1 -15 5363671  324100                                                     5282232    0.45    0.00  1.0000
  -4   1 -14 1129901  165361                                                     1175973    0.55    0.00  1.0000
  -4   1 -14 1236864  150906                                                     1285047    0.55    0.00  1.0000
  -4   1 -13 1137867  142969                                                     1184428    0.56    0.00  1.0000
  -4   1 -13 1024877  151853                                                     1069088    0.56    0.00  1.0000
  -4   1 -12 6386057  276001                                                     6290730    0.49    0.00  1.0000
  -4   1 -12 6611630  305193                                                     6514628    0.49    0.00  1.0000
  -4   1 -11 4918992  234135                                                     4982605    0.36    0.00  1.0000
  -4   1 -11 5026630  259227                                                     5090934    0.36    0.00  1.0000
  -4   1 -10  657820  114935                                                      674450    0.26    0.00  1.0000
  -4   1 -10  661737  100672                                                      678415    0.26    0.00  1.0000
  -4   1  -911409453  341830                                                    11344154    0.25    0.00  1.0000
  -4   1  -910982763  303637                                                    10918702    0.25    0.00  1.0000
  -4   1  -8 8652983  283121                                                     8737676    0.37    0.00  1.0000
  -4   1  -8 8523339  255621                                                     8607397    0.37    0.00  1.0000
  -4   1  -7  277620   61556                                                      303370    0.61    0.00  1.0000
  -4   1  -7  264551   68319                                                      289702    0.61    0.00  1.0000
  -4   1  -6 6786535  217644                                                     6607550    0.89    0.00  1.0000
  -4   1  -6 6611624  191830                                                     6434976    0.89    0.00  1.0000
  -4   1  -513164163  282998                                                    13476083    1.09    0.00  1.0000
  -4   1  -512818700  245304                                                    13126525    1.09    0.00  1.0000
  -4   1  -4 1304082   85683                                                     1207010    1.10    0.00  1.0000
  -4   1  -4 1285627   73514                                                     1189257    1.10    0.00  1.0000
  -4   1  -3 6265044  135144                                                     6096613    0.87    0.00  1.0000
  -4   1  -3 6468541  162819                                                     6297379    0.87    0.00  1.0000
  -4   1  -248045508  318037                                                    48263608    0.40    0.00  1.0000
  -4   1  -247984444  381555                                                    48202408    0.40    0.00  1.0000
  -4   1  -1  302896   33586                                                      310674   -0.20    0.00  1.0000
  -4   1  -1  240280   24930                                                      247211   -0.20    0.00  1.0000
  -4   2 -17  737290  155934                                                      722421   -0.22    0.00  1.0000
  -4   2 -17  865468  148905                                                      849352   -0.22    0.00  1.0000
  -4   2 -16  460947  133348                                                      439570   -0.41    0.00  1.0000
  -4   2 -16  649641  128604                                                      624216   -0.41    0.00  1.0000
  -4   2 -15 4997658  288775                                                     5099750   -0.58    0.00  1.0000
  -4   2 -15 4331536  289973                                                     4426616   -0.58    0.00  1.0000
  -4   2 -14 4318415  280705                                                     4205807   -0.70    0.00  1.0000
  -4   2 -14 4678788  264714                                                     4561545   -0.70    0.00  1.0000
  -4   2 -13   99509   88002                                                      118372   -0.73    0.00  1.0000
  -4   2 -13     824   88255                                                       -7758   -0.73    0.00  1.0000
  -4   2 -12 3362175  231697                                                     3459853   -0.68    0.00  1.0000
  -4   2 -12 3542977  216659                                                     3643228   -0.68    0.00  1.0000
  -4   2 -11 7204769  310196                                                     7078782   -0.60    0.00  1.0000
  -4   2 -11 7248998  283365                                                     7122623   -0.60    0.00  1.0000
  -4   2 -10  330980   95385                                                      356926   -0.56    0.00  1.0000
  -4   2 -10  518762   95327                                                      551124   -0.56    0.00  1.0000
  -4   2  -9 7487695  259486                                                     7624486   -0.63    0.00  1.0000
  -4   2  -9 7974431  293125                                                     8115577   -0.63    0.00  1.0000
  -4   2  -8 7533874  264452                                                     7352642   -0.85    0.00  1.0000
  -4   2  -8 7655500  242019                                                     7472801   -0.85    0.00  1.0000
  -4   2  -7 5686159  225515                                                     5913329   -1.20    0.00  1.0000
  -4   2  -7 5400780  200769                                                     5622230   -1.20    0.00  1.0000
  -4   2  -6 1367113  104413                                                     1515026   -1.59    0.00  1.0000
  -4   2  -6 1392358  115272                                                     1541597   -1.59    0.00  1.0000
  -4   2  -522840412  339215                                                    22138530   -1.89    0.00  1.0000
  -4   2  -522686536  371302                                                    21987042   -1.89    0.00  1.0000
  -4   2  -4 8032740  196540                                                     8477375   -1.98    0.00  1.0000
  -4   2  -4 7825212  209228                                                     8264142   -1.98    0.00  1.0000
  -4   2  -3   10735   43119                                                       18592   -1.79    0.00  1.0000
  -4   2  -215460495  228048                                                    15044993   -1.36    0.00  1.0000
  -4   2  -111967730  180762                                                    12178017   -0.77    0.00  1.0000
  -4   3 -17 1115459  187485                                                     1129677    0.17    0.00  1.0000
  -4   3 -17 1056309  164946                                                     1070145    0.17    0.00  1.0000
  -4   3 -16   79936  111884                                                       72221    0.36    0.00  1.0000
  -4   3 -16  130039  106623                                                      120145    0.36    0.00  1.0000
  -4   3 -15 2293809  221676                                                     2232622    0.52    0.00  1.0000
  -4   3 -15 2001593  200342                                                     1944463    0.52    0.00  1.0000
  -4   3 -14 7366463  366562                                                     7499781    0.62    0.00  1.0000
  -4   3 -14 7394929  340052                                                     7528504    0.62    0.00  1.0000
  -4   3 -13  368365  111499                                                      338794    0.65    0.00  1.0000
  -4   3 -13  462184  110672                                                      428991    0.65    0.00  1.0000
  -4   3 -12 1546151  153201                                                     1487575    0.61    0.00  1.0000
  -4   3 -12 1577223  171587                                                     1518056    0.61    0.00  1.0000
  -4   3 -11 3574843  230423                                                     3656862    0.56    0.00  1.0000
  -4   3 -11 3580160  217903                                                     3662240    0.56    0.00  1.0000
  -4   3 -10 3312420  212766                                                     3233152    0.56    0.00  1.0000
  -4   3 -10 3415848  197937                                                     3335345    0.56    0.00  1.0000
  -4   3  -9  435078   89495                                                      400403    0.69    0.00  1.0000
  -4   3  -9  542387   89794                                                      503588    0.69    0.00  1.0000
  -4   3  -817431942  388799                                                    17751604    0.97    0.00  1.0000
  -4   3  -817591070  418318                                                    17912182    0.97    0.00  1.0000
  -4   3  -716901582  355255                                                    16458962    1.38    0.00  1.0000
  -4   3  -717477180  382212                                                    17027040    1.38    0.00  1.0000
  -4   3  -6    5155   60025                                                       -9301    1.82    0.00  1.0000
  -4   3  -6   78485   56454                                                       43411    1.82    0.00  1.0000
  -4   3  -5 6634404  210833                                                     7075132    2.16    0.00  1.0000
  -4   3  -5 6705789  223238                                                     7148845    2.16    0.00  1.0000
  -4   3  -412807821  268687                                                    12179350    2.27    0.00  1.0000
  -4   3  -3 1181107   94666                                                     1367364    2.11    0.00  1.0000
  -4   4 -16 1237020  175307                                                     1259512   -0.26    0.00  1.0000
  -4   4 -16 1149581  179666                                                     1171268   -0.26    0.00  1.0000
  -4   4 -15 1644694  190635                                                     1682738   -0.37    0.00  1.0000
  -4   4 -15 1590769  199386                                                     1628187   -0.37    0.00  1.0000
  -4   4 -14 2884617  222132                                                     2828468   -0.43    0.00  1.0000
  -4   4 -14 3055337  244739                                                     2997543   -0.43    0.00  1.0000
  -4   4 -13 1588611  183780                                                     1628642   -0.41    0.00  1.0000
  -4   4 -13 1409307  158782                                                     1447025   -0.41    0.00  1.0000
  -4   4 -12     182  102291                                                     -136288   -0.34    0.00  1.0000
  -4   4 -12   64750   80254                                                       71468   -0.34    0.00  1.0000
  -4   4 -11 4441152  237275                                                     4396212   -0.27    0.00  1.0000
  -4   4 -11 4523918  259746                                                     4478560   -0.27    0.00  1.0000
  -4   4 -10 8034609  322558                                                     8095612   -0.27    0.00  1.0000
  -4   4 -10 7276950  295281                                                     7335009   -0.27    0.00  1.0000
  -4   4  -9   46875   70710                                                       50645   -0.41    0.00  1.0000
  -4   4  -9     258   74258                                                      -21855   -0.41    0.00  1.0000
  -4   4  -8 3554085  198223                                                     3452415   -0.70    0.00  1.0000
  -4   4  -8 3466237  187226                                                     3365840   -0.70    0.00  1.0000
  -4   4  -7 9862538  298503                                                    10135905   -1.11    0.00  1.0000
  -4   4  -710447613  319024                                                    10728918   -1.11    0.00  1.0000
  -4   4  -6 4109378  185872                                                     3868702   -1.54    0.00  1.0000
  -4   4  -5  838889   89347                                                      712605   -1.86    0.00  1.0000
  -4   5 -16  946552  162773                                                      931754    0.20    0.00  1.0000
  -4   5 -16  839982  162557                                                      826045    0.20    0.00  1.0000
  -4   5 -15   82297   95089                                                       88010    0.26    0.00  1.0000
  -4   5 -15   25956  106159                                                       29203    0.26    0.00  1.0000
  -4   5 -14 1646758  185095                                                     1672331    0.25    0.00  1.0000
  -4   5 -14 1730030  200675                                                     1756240    0.25    0.00  1.0000
  -4   5 -13 4352463  281486                                                     4322801    0.18    0.00  1.0000
  -4   5 -13 4524437  272791                                                     4494194    0.18    0.00  1.0000
  -4   5 -12  503309  123442                                                      506974    0.07    0.00  1.0000
  -4   5 -12  573587  126003                                                      577499    0.07    0.00  1.0000
  -4   5 -11 1367445  157212                                                     1363631   -0.04    0.00  1.0000
  -4   5 -11 1068834  144085                                                     1065463   -0.04    0.00  1.0000
  -4   5 -10 4097074  246293                                                     4109431   -0.08    0.00  1.0000
  -4   5 -10 3788907  228699                                                     3800790   -0.08    0.00  1.0000
  -4   5  -9 1092562  135762                                                     1093755    0.01    0.00  1.0000
  -4   5  -9 1005613  126588                                                     1006757    0.01    0.00  1.0000
  -4   5  -8  255120   86235                                                      245023    0.26    0.00  1.0000
  -4   5  -8  220551   88584                                                      211171    0.26    0.00  1.0000
  -4   5  -7 9215970  311220                                                     9071070    0.61    0.00  1.0000
  -4   5  -6 7136605  268016                                                     7342810    0.98    0.00  1.0000
  -4   6 -15  865924  161460                                                      853883   -0.17    0.00  1.0000
  -4   6 -15  801404  154996                                                      789822   -0.17    0.00  1.0000
  -4   6 -14  764198  152021                                                      755415   -0.13    0.00  1.0000
  -4   6 -14  740506  152981                                                      731860   -0.13    0.00  1.0000
  -4   6 -13 2258876  213699                                                     2261966   -0.03    0.00  1.0000
  -4   6 -13 2633819  234993                                                     2637155   -0.03    0.00  1.0000
  -4   6 -12 3826844  262346                                                     3844343    0.11    0.00  1.0000
  -4   6 -12 3610747  247805                                                     3627746    0.11    0.00  1.0000
  -4   6 -11  621949  128687                                                      606636    0.25    0.00  1.0000
  -4   6 -11  952793  146298                                                      933817    0.25    0.00  1.0000
  -4   6 -10 3337379  222128                                                     3292974    0.31    0.00  1.0000
  -4   6 -10 3363060  232653                                                     3318485    0.31    0.00  1.0000
  -4   6  -9 7755381  319243                                                     7811891    0.26    0.00  1.0000
  -4   6  -9 7839001  333401                                                     7895815    0.26    0.00  1.0000
  -4   6  -8       8   78018                                                       -3443    0.07    0.00  1.0000
  -4   6  -7  804594  121032                                                      818444   -0.20    0.00  1.0000
  -4   7 -14  502864  127699                                                      502672    0.00    0.00  1.0000
  -4   7 -14  433690  136151                                                      433512    0.00    0.00  1.0000
  -4   7 -13  482617  132929                                                      487641   -0.10    0.00  1.0000
  -4   7 -13  348953  120634                                                      353226   -0.10    0.00  1.0000
  -4   7 -12 6846530  356103                                                     6799743   -0.23    0.00  1.0000
  -4   7 -12 6276155  343363                                                     6231362   -0.23    0.00  1.0000
  -4   7 -11 3144718  236067                                                     3193674   -0.35    0.00  1.0000
  -4   7 -11 2967689  239147                                                     3015252   -0.35    0.00  1.0000
  -4   7 -10 1016756  162334                                                     1049222   -0.41    0.00  1.0000
  -4   7 -10  999254  156061                                                     1031442   -0.41    0.00  1.0000
  -4   7  -9 6540607  325809                                                     6468394   -0.36    0.00  1.0000
  -4   7  -8  159694   92083                                                      165370   -0.21    0.00  1.0000
  -4   8 -13   10396  100696                                                        9089    0.18    0.00  1.0000
  -4   8 -13      53  123728                                                     -188364    0.18    0.00  1.0000
  -4   8 -12 2026197  220133                                                     2058791    0.29    0.00  1.0000
  -4   8 -12 1861469  213728                                                     1892715    0.29    0.00  1.0000
  -4   8 -11 3481458  257303                                                     3424920    0.39    0.00  1.0000
  -4   8 -11 3529445  270461                                                     3472517    0.39    0.00  1.0000
  -4   8 -10     280  116213                                                      -76363    0.42    0.00  1.0000
  -4   8  -9 2857587  235415                                                     2906439    0.37    0.00  1.0000
  -4   9 -12  680479  155400                                                      662709   -0.28    0.00  1.0000
  -4   9 -12  586260  158410                                                      569775   -0.28    0.00  1.0000
  -4   9 -11 3228375  279185                                                     3278871   -0.36    0.00  1.0000
  -4   9 -10  246734  122418                                                      232491   -0.38    0.00  1.0000
  -4  10 -10 1711866  217282                                                     1741136    0.29    0.00  1.0000
  -3 -11   0       9  106947                                                       -7011    0.08    0.00  1.0000
  -3 -11   0       9  112482                                                      -33594    0.08    0.00  1.0000
  -3 -11   1  162051  111232                                                      161876   -0.01    0.00  1.0000
  -3 -11   1  165746  109127                                                      165570   -0.01    0.00  1.0000
  -3 -11   2 2443891  232332                                                     2452173   -0.07    0.00  1.0000
  -3 -11   2 2249460  235489                                                     2257406   -0.07    0.00  1.0000
  -3 -11   3  957184  172728                                                      950891   -0.08    0.00  1.0000
  -3 -10  -6  210591  131823                                                      212763    0.06    0.00  1.0000
  -3 -10  -6  251258  108303                                                      253629    0.06    0.00  1.0000
  -3 -10  -5 1129468  185813                                                     1125281   -0.05    0.00  1.0000
  -3 -10  -5 1114477  165283                                                     1110318   -0.05    0.00  1.0000
  -3 -10  -4 3383138  282892                                                     3406272   -0.16    0.00  1.0000
  -3 -10  -4 3206238  260595                                                     3228759   -0.16    0.00  1.0000
  -3 -10  -3  550319  139120                                                      537066   -0.23    0.00  1.0000
  -3 -10  -3  530325  150183                                                      517316   -0.23    0.00  1.0000
  -3 -10  -2  574199  149752                                                      560204   -0.24    0.00  1.0000
  -3 -10  -2  429847  125892                                                      417749   -0.24    0.00  1.0000
  -3 -10  -1 3280985  254337                                                     3304411   -0.17    0.00  1.0000
  -3 -10  -1 3271551  268425                                                     3294943   -0.17    0.00  1.0000
  -3 -10   0 2131037  213029                                                     2126884   -0.04    0.00  1.0000
  -3 -10   0 2004768  221882                                                     2000741   -0.04    0.00  1.0000
  -3 -10   1      17  103841                                                      -37949    0.11    0.00  1.0000
  -3 -10   1      17   97891                                                      -47992    0.11    0.00  1.0000
  -3 -10   2 3246885  255994                                                     3217003    0.21    0.00  1.0000
  -3 -10   2 3332838  260202                                                     3302563    0.21    0.00  1.0000
  -3 -10   3 1055509  169837                                                     1075272    0.25    0.00  1.0000
  -3 -10   4      72  104214                                                      -39991    0.21    0.00  1.0000
  -3 -10   5  461490  135622                                                      454293    0.14    0.00  1.0000
  -3 -10   6 1892703  211708                                                     1898820    0.06    0.00  1.0000
  -3 -10   7  668840  145736                                                      668963    0.00    0.00  1.0000
  -3 -10   8  924848  165027                                                      927343   -0.03    0.00  1.0000
  -3 -10   9 1872026  216135                                                     1867250   -0.04    0.00  1.0000
  -3  -9  -8 1037382  181671                                                     1016464   -0.26    0.00  1.0000
  -3  -9  -8 1167711  169445                                                     1145512   -0.26    0.00  1.0000
  -3  -9  -7 1158978  187384                                                     1175700   -0.20    0.00  1.0000
  -3  -9  -7 1379688  179490                                                     1397928   -0.20    0.00  1.0000
  -3  -9  -6  285716  122549                                                      282824   -0.07    0.00  1.0000
  -3  -9  -6  412169  120639                                                      408693   -0.07    0.00  1.0000
  -3  -9  -5   70252   85516                                                       72056    0.09    0.00  1.0000
  -3  -9  -5   55485  110481                                                       57090    0.09    0.00  1.0000
  -3  -9  -4 1798639  202177                                                     1775448    0.22    0.00  1.0000
  -3  -9  -4 1572364  182924                                                     1550686    0.22    0.00  1.0000
  -3  -9  -3 4791109  304123                                                     4841207    0.29    0.00  1.0000
  -3  -9  -3 5116260  301810                                                     5168026    0.29    0.00  1.0000
  -3  -9  -2  290440  106135                                                      279623    0.26    0.00  1.0000
  -3  -9  -2  345758  129545                                                      333947    0.26    0.00  1.0000
  -3  -9  -1 2611350  222396                                                     2595723    0.12    0.00  1.0000
  -3  -9  -1 2539160  240723                                                     2523751    0.12    0.00  1.0000
  -3  -9   0 4907702  296478                                                     4895045   -0.07    0.00  1.0000
  -3  -9   0 4724890  282158                                                     4712472   -0.07    0.00  1.0000
  -3  -9   1   57078   92554                                                       61998   -0.27    0.00  1.0000
  -3  -9   1   32021   99059                                                       35728   -0.27    0.00  1.0000
  -3  -9   2  730504  142034                                                      758184   -0.41    0.00  1.0000
  -3  -9   2  816289  137539                                                      845535   -0.41    0.00  1.0000
  -3  -9   3 2253827  210830                                                     2201386   -0.45    0.00  1.0000
  -3  -9   4 1697183  191832                                                     1738940   -0.41    0.00  1.0000
  -3  -9   5     148  106345                                                      -49468   -0.31    0.00  1.0000
  -3  -9   6 3577708  256936                                                     3547897   -0.20    0.00  1.0000
  -3  -9   7 1939656  204017                                                     1952643   -0.12    0.00  1.0000
  -3  -9   8   24941   91937                                                       25756   -0.07    0.00  1.0000
  -3  -9   9 2178455  221908                                                     2173224   -0.05    0.00  1.0000
  -3  -9  10 2977720  251983                                                     2982682   -0.04    0.00  1.0000
  -3  -9  11  139560  118360                                                      138407   -0.04    0.00  1.0000
  -3  -9  12  599496  147761                                                      596464   -0.05    0.00  1.0000
  -3  -8 -11      53  119512                                                     -155681    0.18    0.00  1.0000
  -3  -8 -11      53  108432                                                     -111470    0.18    0.00  1.0000
  -3  -8 -10 1730109  192072                                                     1698841    0.31    0.00  1.0000
  -3  -8 -10 1834952  221066                                                     1802746    0.31    0.00  1.0000
  -3  -8  -9 1651934  204238                                                     1691206    0.39    0.00  1.0000
  -3  -8  -9 1508048  183994                                                     1545581    0.39    0.00  1.0000
  -3  -8  -8   16702   92195                                                       20906    0.39    0.00  1.0000
  -3  -8  -8   60849  104131                                                       68662    0.39    0.00  1.0000
  -3  -8  -7  518891  120210                                                      503113    0.29    0.00  1.0000
  -3  -8  -7  537336  133612                                                      521277    0.29    0.00  1.0000
  -3  -8  -6 2110827  198668                                                     2123763    0.12    0.00  1.0000
  -3  -8  -6 2104515  221019                                                     2117431    0.12    0.00  1.0000
  -3  -8  -5  976964  153239                                                      983123   -0.08    0.00  1.0000
  -3  -8  -5  865202  137654                                                      870998   -0.08    0.00  1.0000
  -3  -8  -4  731734  133603                                                      746862   -0.23    0.00  1.0000
  -3  -8  -4  779481  141084                                                      795093   -0.23    0.00  1.0000
  -3  -8  -3 2955188  214923                                                     2919376   -0.27    0.00  1.0000
  -3  -8  -3 2569103  218216                                                     2535719   -0.27    0.00  1.0000
  -3  -8  -2 2027160  190847                                                     2047641   -0.18    0.00  1.0000
  -3  -8  -2 2030235  184151                                                     2050731   -0.18    0.00  1.0000
  -3  -8  -1   22191   92617                                                       22362    0.02    0.00  1.0000
  -3  -8  -1   41304   81364                                                       41538    0.02    0.00  1.0000
  -3  -8   0 3955670  248238                                                     3997860    0.27    0.00  1.0000
  -3  -8   0 4165454  266919                                                     4208746    0.27    0.00  1.0000
  -3  -8   1 2938014  220787                                                     2870839    0.51    0.00  1.0000
  -3  -8   1 3068504  214305                                                     2999846    0.51    0.00  1.0000
  -3  -8   2     660   90218                                                      -45531    0.65    0.00  1.0000
  -3  -8   2     660   86367                                                      -59922    0.65    0.00  1.0000
  -3  -8   3 5254660  280069                                                     5376669    0.68    0.00  1.0000
  -3  -8   3 5249882  289533                                                     5371837    0.68    0.00  1.0000
  -3  -8   4  754053  134265                                                      717021    0.59    0.00  1.0000
  -3  -8   5 1101336  153058                                                     1139330    0.46    0.00  1.0000
  -3  -8   6 1224740  164521                                                     1251827    0.31    0.00  1.0000
  -3  -8   7 5538196  299685                                                     5500647    0.20    0.00  1.0000
  -3  -8   8 1093888  160101                                                     1105134    0.14    0.00  1.0000
  -3  -8   9 1459431  178430                                                     1469800    0.11    0.00  1.0000
  -3  -8  10 3492090  256971                                                     3475956    0.11    0.00  1.0000
  -3  -8  11 1417231  184359                                                     1429795    0.14    0.00  1.0000
  -3  -8  12      46  107374                                                      -75032    0.17    0.00  1.0000
  -3  -8  13 1649550  203889                                                     1629414    0.20    0.00  1.0000
  -3  -7 -12 2618246  255959                                                     2598041   -0.16    0.00  1.0000
  -3  -7 -12 2327901  225469                                                     2308851   -0.16    0.00  1.0000
  -3  -7 -11  130547   94852                                                      139509   -0.32    0.00  1.0000
  -3  -7 -11  154307  113126                                                      164038   -0.32    0.00  1.0000
  -3  -7 -10 1495499  179387                                                     1542052   -0.48    0.00  1.0000
  -3  -7 -10 1766378  209171                                                     1816941   -0.48    0.00  1.0000
  -3  -7  -9 2277742  204660                                                     2210536   -0.58    0.00  1.0000
  -3  -7  -9 2695353  233863                                                     2622203   -0.58    0.00  1.0000
  -3  -7  -8 1983974  209059                                                     2047308   -0.57    0.00  1.0000
  -3  -7  -8 1960518  187102                                                     2023479   -0.57    0.00  1.0000
  -3  -7  -7  160101  106766                                                      173944   -0.45    0.00  1.0000
  -3  -7  -7  124823   84038                                                      137077   -0.45    0.00  1.0000
  -3  -7  -6 4365298  263390                                                     4325240   -0.25    0.00  1.0000
  -3  -7  -6 4640905  254528                                                     4599599   -0.25    0.00  1.0000
  -3  -7  -5 2503425  197575                                                     2508648   -0.04    0.00  1.0000
  -3  -7  -5 2577351  207394                                                     2582649   -0.04    0.00  1.0000
  -3  -7  -4   26398   95354                                                       25295    0.09    0.00  1.0000
  -3  -7  -4   63952   73946                                                       62228    0.09    0.00  1.0000
  -3  -7  -3 1530545  153948                                                     1538507    0.08    0.00  1.0000
  -3  -7  -3 1519666  164805                                                     1527600    0.08    0.00  1.0000
  -3  -7  -2 5441563  277569                                                     5453792   -0.07    0.00  1.0000
  -3  -7  -2 5369400  259931                                                     5381547   -0.07    0.00  1.0000
  -3  -7  -1  417617  111962                                                      401057   -0.33    0.00  1.0000
  -3  -7  -1  325131   97067                                                      310539   -0.33    0.00  1.0000
  -3  -7   0 2068848  168054                                                     1999044   -0.63    0.00  1.0000
  -3  -7   0 2268140  191965                                                     2195023   -0.63    0.00  1.0000
  -3  -7   1 4376617  238223                                                     4519902   -0.87    0.00  1.0000
  -3  -7   1 4537155  253455                                                     4683024   -0.87    0.00  1.0000
  -3  -7   2 1681898  158371                                                     1582529   -0.99    0.00  1.0000
  -3  -7   2 1838335  156856                                                     1734380   -0.99    0.00  1.0000
  -3  -7   3 1083194  130147                                                     1005916   -0.97    0.00  1.0000
  -3  -7   3 1023541  128515                                                      948460   -0.97    0.00  1.0000
  -3  -7   4 2657924  203299                                                     2762435   -0.82    0.00  1.0000
  -3  -7   5 2992572  211102                                                     2909211   -0.62    0.00  1.0000
  -3  -7   6     276   83336                                                      -16122   -0.42    0.00  1.0000
  -3  -7   7 6524930  303955                                                     6577965   -0.26    0.00  1.0000
  -3  -7   8 2448598  203190                                                     2428117   -0.17    0.00  1.0000
  -3  -7   9      29   97525                                                      -31471   -0.14    0.00  1.0000
  -3  -7  10 1646168  183091                                                     1661939   -0.16    0.00  1.0000
  -3  -7  11 4712633  284525                                                     4675510   -0.22    0.00  1.0000
  -3  -7  12  101846  107514                                                      109253   -0.30    0.00  1.0000
  -3  -7  13  984885  165971                                                     1012744   -0.36    0.00  1.0000
  -3  -7  14 1853755  203102                                                     1814199   -0.38    0.00  1.0000
  -3  -7  15   81595  108926                                                       88973   -0.35    0.00  1.0000
  -3  -6 -13  405262  120445                                                      398259    0.14    0.00  1.0000
  -3  -6 -13  447930  135634                                                      440566    0.14    0.00  1.0000
  -3  -6 -12 1987651  196457                                                     2022570    0.32    0.00  1.0000
  -3  -6 -12 2198721  231150                                                     2235440    0.32    0.00  1.0000
  -3  -6 -11 2692506  219374                                                     2623748    0.54    0.00  1.0000
  -3  -6 -11 2709203  240562                                                     2640230    0.54    0.00  1.0000
  -3  -6 -10   22266   96218                                                       14380    0.74    0.00  1.0000
  -3  -6 -10     865   88892                                                      -28680    0.74    0.00  1.0000
  -3  -6  -9 3116147  220925                                                     3236045    0.87    0.00  1.0000
  -3  -6  -9 3247135  243671                                                     3369506    0.87    0.00  1.0000
  -3  -6  -8 8437117  333156                                                     8242555    0.86    0.00  1.0000
  -3  -6  -8 9005650  368404                                                     8804603    0.86    0.00  1.0000
  -3  -6  -7 1205248  155361                                                     1269124    0.73    0.00  1.0000
  -3  -6  -7 1092138  135127                                                     1152982    0.73    0.00  1.0000
  -3  -6  -6 4056778  227278                                                     4140547    0.53    0.00  1.0000
  -3  -6  -6 4143648  246443                                                     4228303    0.53    0.00  1.0000
  -3  -6  -5 8647901  310202                                                     8569146    0.34    0.00  1.0000
  -3  -6  -5 8993993  336125                                                     8913674    0.34    0.00  1.0000
  -3  -6  -4 1174548  131993                                                     1196487    0.26    0.00  1.0000
  -3  -6  -4 1184291  143506                                                     1206321    0.26    0.00  1.0000
  -3  -6  -3 4292814  238693                                                     4346524    0.33    0.00  1.0000
  -3  -6  -3 4477414  222738                                                     4532263    0.33    0.00  1.0000
  -3  -6  -211018096  346912                                                    10874074    0.56    0.00  1.0000
  -3  -6  -211624927  343686                                                    11476978    0.56    0.00  1.0000
  -3  -6  -1 3864935  221735                                                     4001996    0.88    0.00  1.0000
  -3  -6  -1 3876070  210369                                                     4013327    0.88    0.00  1.0000
  -3  -6   0    2311   77328                                                      -37770    1.22    0.00  1.0000
  -3  -6   0    2311   80734                                                     -127691    1.22    0.00  1.0000
  -3  -6   1 7189162  281326                                                     6886635    1.46    0.00  1.0000
  -3  -6   1 6701223  259842                                                     6409253    1.46    0.00  1.0000
  -3  -6   2 7228819  292289                                                     7556710    1.54    0.00  1.0000
  -3  -6   2 7088642  277348                                                     7413373    1.54    0.00  1.0000
  -3  -6   3   65053   80493                                                       39203    1.45    0.00  1.0000
  -3  -6   4 7141955  273998                                                     6889166    1.22    0.00  1.0000
  -3  -6   5 4569916  236446                                                     4724395    0.92    0.00  1.0000
  -3  -6   6 1754215  157679                                                     1689631    0.63    0.00  1.0000
  -3  -6   7 3487892  209818                                                     3431343    0.39    0.00  1.0000
  -3  -6   8 5627301  270941                                                     5670540    0.23    0.00  1.0000
  -3  -6   9 1517696  156037                                                     1501189    0.17    0.00  1.0000
  -3  -6  10  618295  117624                                                      606257    0.20    0.00  1.0000
  -3  -6  11 2896588  218640                                                     2933873    0.28    0.00  1.0000
  -3  -6  12 1772154  184035                                                     1732471    0.39    0.00  1.0000
  -3  -6  13     338   99242                                                       -2382    0.47    0.00  1.0000
  -3  -6  14 2550646  229107                                                     2611417    0.49    0.00  1.0000
  -3  -6  15 1934950  214258                                                     1887746    0.44    0.00  1.0000
  -3  -5 -15 1070483  168637                                                     1066769   -0.05    0.00  1.0000
  -3  -5 -15 1277081  191080                                                     1273023   -0.05    0.00  1.0000
  -3  -5 -14 3158450  247609                                                     3179253   -0.15    0.00  1.0000
  -3  -5 -14 2913966  260133                                                     2933949   -0.15    0.00  1.0000
  -3  -5 -13     163  102931                                                     -161617   -0.32    0.00  1.0000
  -3  -5 -13     163  109782                                                     -106003   -0.32    0.00  1.0000
  -3  -5 -12 3873407  250385                                                     3786445   -0.57    0.00  1.0000
  -3  -5 -12 4253545  279841                                                     4162391   -0.57    0.00  1.0000
  -3  -5 -11 2935508  215791                                                     3048579   -0.85    0.00  1.0000
  -3  -5 -11 3068816  241321                                                     3184403   -0.85    0.00  1.0000
  -3  -5 -10 1543409  158503                                                     1438914   -1.09    0.00  1.0000
  -3  -5 -10 1588635  169518                                                     1482594   -1.09    0.00  1.0000
  -3  -5  -9  293711   81893                                                      246008   -1.24    0.00  1.0000
  -3  -5  -9  353830  108979                                                      301293   -1.24    0.00  1.0000
  -3  -5  -811974160  372329                                                    12315249   -1.25    0.00  1.0000
  -3  -5  -812172991  410348                                                    12516880   -1.25    0.00  1.0000
  -3  -5  -7 4615878  243974                                                     4427055   -1.13    0.00  1.0000
  -3  -5  -7 4259630  213525                                                     4078315   -1.13    0.00  1.0000
  -3  -5  -6 2175767  151195                                                     2065501   -0.96    0.00  1.0000
  -3  -5  -6 2333520  172743                                                     2219276   -0.96    0.00  1.0000
  -3  -5  -5 9330251  325156                                                     9529319   -0.83    0.00  1.0000
  -3  -5  -5 8942138  292071                                                     9137042   -0.83    0.00  1.0000
  -3  -5  -4 1781772  147857                                                     1699129   -0.82    0.00  1.0000
  -3  -5  -4 1850819  136348                                                     1766571   -0.82    0.00  1.0000
  -3  -5  -3    1505   62698                                                      -12963   -0.98    0.00  1.0000
  -3  -5  -3    1505   65934                                                       -3658   -0.98    0.00  1.0000
  -3  -5  -2 6948673  250127                                                     7220363   -1.30    0.00  1.0000
  -3  -5  -2 6882292  263561                                                     7152693   -1.30    0.00  1.0000
  -3  -5  -112572003  318786                                                    12101122   -1.71    0.00  1.0000
  -3  -5  -112572048  335625                                                    12101167   -1.71    0.00  1.0000
  -3  -5   0 2002847  156950                                                     2242621   -2.09    0.00  1.0000
  -3  -5   0 1925783  141821                                                     2161029   -2.09    0.00  1.0000
  -3  -5   1 7507159  278493                                                     8019626   -2.34    0.00  1.0000
  -3  -5   1 7586193  260410                                                     8101308   -2.34    0.00  1.0000
  -3  -5   2 8233117  251762                                                     7706925   -2.39    0.00  1.0000
  -3  -5   2 7791132  260737                                                     7279488   -2.39    0.00  1.0000
  -3  -5   3 4254874  210593                                                     4623155   -2.23    0.00  1.0000
  -3  -5   4 3066918  182191                                                     3334148   -1.90    0.00  1.0000
  -3  -5   519663906  420088                                                    19149532   -1.49    0.00  1.0000
  -3  -5   6 3021579  186589                                                     3167618   -1.07    0.00  1.0000
  -3  -5   7  205086   77978                                                      231173   -0.71    0.00  1.0000
  -3  -5   8 1890696  149640                                                     1842012   -0.46    0.00  1.0000
  -3  -5   9 3776936  217204                                                     3828694   -0.34    0.00  1.0000
  -3  -5  10  594855  115850                                                      574747   -0.33    0.00  1.0000
  -3  -5  11 2063718  181876                                                     2018707   -0.41    0.00  1.0000
  -3  -5  12 7227021  326340                                                     7332600   -0.50    0.00  1.0000
  -3  -5  13  531107  126173                                                      499827   -0.56    0.00  1.0000
  -3  -5  14  678347  141877                                                      643449   -0.55    0.00  1.0000
  -3  -4 -15 1347409  191697                                                     1360464    0.14    0.00  1.0000
  -3  -4 -15 1248755  171290                                                     1261324    0.14    0.00  1.0000
  -3  -4 -14 3680111  249488                                                     3637457    0.29    0.00  1.0000
  -3  -4 -14 3835111  274960                                                     3791565    0.29    0.00  1.0000
  -3  -4 -13 2074037  215258                                                     2131232    0.50    0.00  1.0000
  -3  -4 -13 2002642  200554                                                     2058851    0.50    0.00  1.0000
  -3  -4 -12 1075169  144070                                                     1140695    0.79    0.00  1.0000
  -3  -4 -12 1123262  159797                                                     1190216    0.79    0.00  1.0000
  -3  -4 -11 2384983  200418                                                     2254967    1.11    0.00  1.0000
  -3  -4 -11 2421667  187754                                                     2290642    1.11    0.00  1.0000
  -3  -4 -1012060003  385310                                                    12444059    1.40    0.00  1.0000
  -3  -4 -1012231544  416892                                                    12618300    1.40    0.00  1.0000
  -3  -4  -9    3883   96229                                                      -25253    1.58    0.00  1.0000
  -3  -4  -9    3883   73113                                                      -24980    1.58    0.00  1.0000
  -3  -4  -811951781  337964                                                    11513396    1.63    0.00  1.0000
  -3  -4  -812009656  370761                                                    11570203    1.63    0.00  1.0000
  -3  -4  -7 6972732  289817                                                     7300605    1.57    0.00  1.0000
  -3  -4  -7 6959246  260840                                                     7286805    1.57    0.00  1.0000
  -3  -4  -6  226095   66324                                                      175223    1.48    0.00  1.0000
  -3  -4  -6  136366   72264                                                       97543    1.48    0.00  1.0000
  -3  -4  -5 5545814  202868                                                     5281581    1.45    0.00  1.0000
  -3  -4  -5 5368552  222520                                                     5108627    1.45    0.00  1.0000
  -3  -4  -413878116  321773                                                    14339046    1.57    0.00  1.0000
  -3  -4  -414400910  355414                                                    14870374    1.57    0.00  1.0000
  -3  -4  -3 3227854  149870                                                     2970897    1.87    0.00  1.0000
  -3  -4  -3 3180998  159766                                                     2925950    1.87    0.00  1.0000
  -3  -4  -2 9719884  246835                                                     9158614    2.32    0.00  1.0000
  -3  -4  -2 9634670  267269                                                     9075902    2.32    0.00  1.0000
  -3  -4  -110962994  276821                                                    11709497    2.84    0.00  1.0000
  -3  -4  -110804795  293081                                                    11545981    2.84    0.00  1.0000
  -3  -4   0 2737177  143446                                                     2332135    3.29    0.00  1.0000
  -3  -4   0 3021526  138513                                                     2595177    3.29    0.00  1.0000
  -3  -4   1  205805   56377                                                       99611    3.57    0.00  1.0000
  -3  -4   1  213199   65554                                                      104789    3.57    0.00  1.0000
  -3  -4   214639653  340795                                                    15738942    3.59    0.00  1.0000
  -3  -4   215089178  318139                                                    16204918    3.59    0.00  1.0000
  -3  -4   323439640  398721                                                    22176100    3.36    0.00  1.0000
  -3  -4   4 1002464   93414                                                      784573    2.93    0.00  1.0000
  -3  -4   5 7008514  240500                                                     7510552    2.38    0.00  1.0000
  -3  -4   6 1977808  133159                                                     1790127    1.81    0.00  1.0000
  -3  -4   7 3505468  189143                                                     3702096    1.32    0.00  1.0000
  -3  -4   8  603720   94909                                                      661331    0.95    0.00  1.0000
  -3  -4   910226729  322826                                                    10041317    0.74    0.00  1.0000
  -3  -4  10 4484151  232153                                                     4597312    0.68    0.00  1.0000
  -3  -4  11 1377750  147767                                                     1443224    0.70    0.00  1.0000
  -3  -4  12 5357373  279673                                                     5222758    0.75    0.00  1.0000
  -3  -3 -16 1136426  160643                                                     1126759   -0.12    0.00  1.0000
  -3  -3 -16  956647  175138                                                      947780   -0.12    0.00  1.0000
  -3  -3 -15  253810  105146                                                      245910   -0.20    0.00  1.0000
  -3  -3 -15  193246  117121                                                      186360   -0.20    0.00  1.0000
  -3  -3 -14 2496122  212092                                                     2538067   -0.34    0.00  1.0000
  -3  -3 -14 2553332  226244                                                     2595753   -0.34    0.00  1.0000
  -3  -3 -13 3843261  264181                                                     3758086   -0.56    0.00  1.0000
  -3  -3 -13 3953138  243446                                                     3866748   -0.56    0.00  1.0000
  -3  -3 -12  133780  105665                                                      159375   -0.86    0.00  1.0000
  -3  -3 -12  159617   90232                                                      187475   -0.86    0.00  1.0000
  -3  -3 -11 1792555  166553                                                     1918710   -1.20    0.00  1.0000
  -3  -3 -11 1764651  175472                                                     1889837   -1.20    0.00  1.0000
  -3  -3 -10 4788557  245819                                                     4535656   -1.51    0.00  1.0000
  -3  -3 -10 4575513  222997                                                     4328376   -1.51    0.00  1.0000
  -3  -3  -9 1847101  167507                                                     2037158   -1.74    0.00  1.0000
  -3  -3  -9 1941710  152819                                                     2136458   -1.74    0.00  1.0000
  -3  -3  -8 1335169  138760                                                     1508409   -1.87    0.00  1.0000
  -3  -3  -8 1435848  127949                                                     1615311   -1.87    0.00  1.0000
  -3  -3  -713277274  315860                                                    12737899   -1.91    0.00  1.0000
  -3  -3  -713846751  356511                                                    13295813   -1.91    0.00  1.0000
  -3  -3  -6 7818268  243918                                                     8250674   -1.95    0.00  1.0000
  -3  -3  -6 8001461  275354                                                     8438837   -1.95    0.00  1.0000
  -3  -3  -5   16431   57053                                                       38322   -2.07    0.00  1.0000
  -3  -3  -5   10641   47383                                                       28678   -2.07    0.00  1.0000
  -3  -3  -4 5849227  200913                                                     5415268   -2.36    0.00  1.0000
  -3  -3  -4 6039995  182585                                                     5598886   -2.36    0.00  1.0000
  -3  -3  -3 6028749  212158                                                     6582782   -2.83    0.00  1.0000
  -3  -3  -3 6044059  189064                                                     6598780   -2.83    0.00  1.0000
  -3  -3  -2 4032830  153978                                                     3503981   -3.45    0.00  1.0000
  -3  -3  -2 4134405  137892                                                     3598706   -3.45    0.00  1.0000
  -3  -3  -115719624  266383                                                    14466189   -4.11    0.00  1.0000
  -3  -3  -115902955  291154                                                    14642082   -4.11    0.00  1.0000
  -3  -3   012822218  284393                                                    14160534   -4.66    0.00  1.0000
  -3  -3   012793271  260955                                                    14130115   -4.66    0.00  1.0000
  -3  -3   1 5235657  147709                                                     4378079   -4.98    0.00  1.0000
  -3  -3   1 5090330  161793                                                     4245270   -4.98    0.00  1.0000
  -3  -3   2 8898443  214662                                                     7769187   -4.98    0.00  1.0000
  -3  -3   316659536  318478                                                    18189404   -4.68    0.00  1.0000
  -3  -3   4  277235   62590                                                      156724   -4.12    0.00  1.0000
  -3  -3   5   97565   58711                                                      194404   -3.42    0.00  1.0000
  -3  -3   6 5742821  209672                                                     6254918   -2.69    0.00  1.0000
  -3  -3   7 7068172  225242                                                     6647967   -2.05    0.00  1.0000
  -3  -3   8  292125   68550                                                      228985   -1.57    0.00  1.0000
  -3  -3   9 7125933  264946                                                     7395800   -1.28    0.00  1.0000
  -3  -3  10 7909732  286681                                                     7658722   -1.15    0.00  1.0000
  -3  -2 -17  607718  138787                                                      599837    0.13    0.00  1.0000
  -3  -2 -17  355278  126681                                                      349257    0.13    0.00  1.0000
  -3  -2 -16 3318810  269330                                                     3340329    0.15    0.00  1.0000
  -3  -2 -16 3313148  251169                                                     3334648    0.15    0.00  1.0000
  -3  -2 -15 1322679  168222                                                     1305534    0.19    0.00  1.0000
  -3  -2 -15 1134509  170342                                                     1118634    0.19    0.00  1.0000
  -3  -2 -14 2829543  230578                                                     2791384    0.29    0.00  1.0000
  -3  -2 -14 2565854  202596                                                     2529523    0.29    0.00  1.0000
  -3  -2 -13 4016201  243936                                                     4090813    0.48    0.00  1.0000
  -3  -2 -13 4309122  266036                                                     4386396    0.48    0.00  1.0000
  -3  -2 -12  279041   96518                                                      251589    0.75    0.00  1.0000
  -3  -2 -12  105428   86397                                                       88762    0.75    0.00  1.0000
  -3  -2 -11 1660812  143991                                                     1552671    1.08    0.00  1.0000
  -3  -2 -11 1698611  159624                                                     1589225    1.08    0.00  1.0000
  -3  -2 -10 3547867  223439                                                     3755784    1.41    0.00  1.0000
  -3  -2 -10 3599492  200303                                                     3808895    1.41    0.00  1.0000
  -3  -2  -910831136  337790                                                    10404250    1.67    0.00  1.0000
  -3  -2  -910198018  294611                                                     9783924    1.67    0.00  1.0000
  -3  -2  -8   31852   71082                                                       63137    1.85    0.00  1.0000
  -3  -2  -8    5359   57166                                                      -15215    1.85    0.00  1.0000
  -3  -2  -719328120  415251                                                    20020584    1.99    0.00  1.0000
  -3  -2  -719088492  368372                                                    19776690    1.99    0.00  1.0000
  -3  -2  -6 8161206  246755                                                     7692625    2.14    0.00  1.0000
  -3  -2  -6 8040800  216997                                                     7575737    2.14    0.00  1.0000
  -3  -2  -5   18001   58277                                                       41675    2.40    0.00  1.0000
  -3  -2  -5   20358   46614                                                       45495    2.40    0.00  1.0000
  -3  -2  -4  109258   48740                                                      157144    2.84    0.00  1.0000
  -3  -2  -4   28646   52668                                                       50281    2.84    0.00  1.0000
  -3  -2  -3 7353635  163622                                                     6641711    3.47    0.00  1.0000
  -3  -2  -3 7448682  191624                                                     6732059    3.47    0.00  1.0000
  -3  -2  -2 9577073  225198                                                    10637314    4.24    0.00  1.0000
  -3  -2  -2 9348755  189788                                                    10396615    4.24    0.00  1.0000
  -3  -2  -112759574  214515                                                    14213841    5.03    0.00  1.0000
  -3  -2  -112205273  244419                                                    13628464    5.03    0.00  1.0000
  -3  -2   017400086  220133                                                    15598513    5.66    0.00  1.0000
  -3  -2   017511430  254320                                                    15703949    5.66    0.00  1.0000
  -3  -2   117008190  279048                                                    19015920    6.02    0.00  1.0000
  -3  -2   117200770  237820                                                    19219518    6.02    0.00  1.0000
  -3  -2   2 2024195   83313                                                     1405896    6.01    0.00  1.0000
  -3  -2   317280850  249498                                                    15493532    5.63    0.00  1.0000
  -3  -2   437143192  414089                                                    39561712    4.96    0.00  1.0000
  -3  -2   5  122065   61111                                                      257830    4.13    0.00  1.0000
  -3  -2   611683223  250771                                                    10818993    3.28    0.00  1.0000
  -3  -2   7 9652455  262566                                                    10278561    2.54    0.00  1.0000
  -3  -2   8 2523746  140023                                                     2282795    1.99    0.00  1.0000
  -3  -1 -17  142095  114767                                                      146396   -0.15    0.00  1.0000
  -3  -1 -17   24575  107455                                                       26382   -0.15    0.00  1.0000
  -3  -1 -16 3052107  236787                                                     3036506   -0.12    0.00  1.0000
  -3  -1 -16 2878277  250251                                                     2863128   -0.12    0.00  1.0000
  -3  -1 -15 2410736  229785                                                     2422876   -0.10    0.00  1.0000
  -3  -1 -15 2464501  204414                                                     2476775   -0.10    0.00  1.0000
  -3  -1 -14   62592   76274                                                       59701   -0.15    0.00  1.0000
  -3  -1 -14      34  108449                                                     -108437   -0.15    0.00  1.0000
  -3  -1 -13 4828560  280075                                                     4778657   -0.29    0.00  1.0000
  -3  -1 -13 5016703  258433                                                     4965835   -0.29    0.00  1.0000
  -3  -1 -12 7239053  293952                                                     7350596   -0.53    0.00  1.0000
  -3  -1 -12 7073288  317036                                                     7183551   -0.53    0.00  1.0000
  -3  -1 -11    1056   88770                                                       -5180   -0.82    0.00  1.0000
  -3  -1 -11   76440   73193                                                       62389   -0.82    0.00  1.0000
  -3  -1 -10 8241939  304861                                                     7991858   -1.12    0.00  1.0000
  -3  -1 -10 8174754  273173                                                     7925703   -1.12    0.00  1.0000
  -3  -1  -9 6636355  268496                                                     6911465   -1.36    0.00  1.0000
  -3  -1  -9 6468578  238376                                                     6740223   -1.36    0.00  1.0000
  -3  -1  -8 2952754  146492                                                     2750649   -1.53    0.00  1.0000
  -3  -1  -8 3068748  168454                                                     2862644   -1.53    0.00  1.0000
  -3  -1  -7  104207   49687                                                       74635   -1.66    0.00  1.0000
  -3  -1  -7  124176   61049                                                       91840   -1.66    0.00  1.0000
  -3  -1  -6 7533451  208162                                                     7927749   -1.82    0.00  1.0000
  -3  -1  -6 7832395  244569                                                     8234344   -1.82    0.00  1.0000
  -3  -1  -515638684  301580                                                    14989852   -2.11    0.00  1.0000
  -3  -1  -514588939  253410                                                    13962493   -2.11    0.00  1.0000
  -3  -1  -4 4909094  157053                                                     4466199   -2.59    0.00  1.0000
  -3  -1  -4 4618491  129469                                                     4189219   -2.59    0.00  1.0000
  -3  -1  -331596896  309287                                                    33066684   -3.29    0.00  1.0000
  -3  -1  -331694926  377017                                                    33166970   -3.29    0.00  1.0000
  -3  -1  -2 8219275  126414                                                     7324525   -4.12    0.00  1.0000
  -3  -1  -2 8225164  162572                                                     7330086   -4.12    0.00  1.0000
  -3  -1  -1  466715   41090                                                      772035   -4.97    0.00  1.0000
  -3  -1  -1  451387   55193                                                      752279   -4.97    0.00  1.0000
  -3  -1   019366878  233189                                                    21375638   -5.66    0.00  1.0000
  -3  -1   018558226  167788                                                    20525644   -5.66    0.00  1.0000
  -3  -1   136407680  285904                                                    33598104   -6.04    0.00  1.0000
  -3  -1   2 7025845  139246                                                     8339809   -6.03    0.00  1.0000
  -3  -1   3 6037251  138626                                                     7170008   -5.62    0.00  1.0000
  -3  -1   423695360  267019                                                    21855098   -4.92    0.00  1.0000
  -3  -1   512559195  238029                                                    13712100   -4.05    0.00  1.0000
  -3  -1   6   15223   49907                                                          74   -3.18    0.00  1.0000
  -3   0 -17  414497  129290                                                      415957    0.03    0.00  1.0000
  -3   0 -17  239624  126003                                                      240735    0.03    0.00  1.0000
  -3   0 -16  914951  159063                                                      910752   -0.06    0.00  1.0000
  -3   0 -16  819572  159631                                                      815598   -0.06    0.00  1.0000
  -3   0 -15 4704679  278657                                                     4725031   -0.12    0.00  1.0000
  -3   0 -15 4778174  305584                                                     4798684   -0.12    0.00  1.0000
  -3   0 -14 3592988  230465                                                     3576119   -0.11    0.00  1.0000
  -3   0 -14 3291106  247632                                                     3274963   -0.11    0.00  1.0000
  -3   0 -13 1401423  171179                                                     1400577   -0.01    0.00  1.0000
  -3   0 -13 1438373  153071                                                     1437516   -0.01    0.00  1.0000
  -3   0 -1211645427  364630                                                    11596093    0.18    0.00  1.0000
  -3   0 -1211448359  397262                                                    11399447    0.18    0.00  1.0000
  -3   0 -11 4142507  232776                                                     4210383    0.43    0.00  1.0000
  -3   0 -11 4169915  216598                                                     4238014    0.43    0.00  1.0000
  -3   0 -10   36924   67661                                                       45100    0.65    0.00  1.0000
  -3   0 -10     659   83557                                                      -36177    0.65    0.00  1.0000
  -3   0  -9 6480986  231456                                                     6321996    0.81    0.00  1.0000
  -3   0  -9 6449957  255562                                                     6291351    0.81    0.00  1.0000
  -3   0  -8 8837290  255811                                                     9042499    0.88    0.00  1.0000
  -3   0  -8 9058725  286893                                                     9266474    0.88    0.00  1.0000
  -3   0  -7    1256   59086                                                      -24483    0.90    0.00  1.0000
  -3   0  -7    1256   48546                                                      -25998    0.90    0.00  1.0000
  -3   0  -6 4753169  181465                                                     4594221    0.95    0.00  1.0000
  -3   0  -6 4714230  160754                                                     4555940    0.95    0.00  1.0000
  -3   0  -530928322  370202                                                    31423652    1.13    0.00  1.0000
  -3   0  -532218656  427995                                                    32724172    1.13    0.00  1.0000
  -3   0  -4  321380   53933                                                      259777    1.53    0.00  1.0000
  -3   0  -4  440682   51745                                                      368046    1.53    0.00  1.0000
  -3   0  -3 8758978  178061                                                     8264444    2.16    0.00  1.0000
  -3   0  -3 8664073  147089                                                     8172264    2.16    0.00  1.0000
  -3   0  -240631572  263949                                                    42131240    2.97    0.00  1.0000
  -3   0  -241042632  342927                                                    42549800    2.97    0.00  1.0000
  -3   0  -111527685  143834                                                    10535636    3.80    0.00  1.0000
  -3   0   0 3484254   59326                                                     2855630    4.50    0.00  1.0000
  -3   1 -17 2393980  234284                                                     2418164    0.20    0.00  1.0000
  -3   1 -17 2033558  241301                                                     2055852    0.20    0.00  1.0000
  -3   1 -16  449547  127775                                                      467613    0.34    0.00  1.0000
  -3   1 -16  460770  132348                                                      479058    0.34    0.00  1.0000
  -3   1 -15 4620567  269018                                                     4545943    0.45    0.00  1.0000
  -3   1 -15 4098805  282530                                                     4028537    0.45    0.00  1.0000
  -3   1 -14 3660593  260454                                                     3732061    0.48    0.00  1.0000
  -3   1 -14 3756438  242616                                                     3828831    0.48    0.00  1.0000
  -3   1 -13  666876  120692                                                      640739    0.41    0.00  1.0000
  -3   1 -13  581375  126968                                                      556988    0.41    0.00  1.0000
  -3   1 -12 3007442  194698                                                     2972048    0.26    0.00  1.0000
  -3   1 -12 2756185  215347                                                     2722306    0.26    0.00  1.0000
  -3   1 -11 8197685  323956                                                     8218362    0.09    0.00  1.0000
  -3   1 -11 8339557  299204                                                     8360412    0.09    0.00  1.0000
  -3   1 -10 2505844  173771                                                     2510678   -0.04    0.00  1.0000
  -3   1 -10 2439935  162342                                                     2444705   -0.04    0.00  1.0000
  -3   1  -9 6497498  236354                                                     6512491   -0.07    0.00  1.0000
  -3   1  -9 6438229  260245                                                     6453154   -0.07    0.00  1.0000
  -3   1  -8 9769302  270899                                                     9769078    0.00    0.00  1.0000
  -3   1  -810008351  296900                                                    10008126    0.00    0.00  1.0000
  -3   1  -7 5612842  192641                                                     5586495    0.14    0.00  1.0000
  -3   1  -7 5590779  211825                                                     5564483    0.14    0.00  1.0000
  -3   1  -6  378274   77260                                                      366230    0.26    0.00  1.0000
  -3   1  -6  362146   65743                                                      350363    0.26    0.00  1.0000
  -3   1  -523549898  328476                                                    23640528    0.24    0.00  1.0000
  -3   1  -523867416  366897                                                    23958652    0.24    0.00  1.0000
  -3   1  -443419604  446208                                                    43431456   -0.02    0.00  1.0000
  -3   1  -442128348  394752                                                    42140028   -0.02    0.00  1.0000
  -3   1  -3 3123852  116498                                                     3200991   -0.55    0.00  1.0000
  -3   1  -3 3140089  101807                                                     3217427   -0.55    0.00  1.0000
  -3   1  -2 9370924  142998                                                     9067934   -1.28    0.00  1.0000
  -3   1  -2 9304226  162334                                                     9002325   -1.28    0.00  1.0000
  -3   1  -1 3558372   88142                                                     3863400   -2.08    0.00  1.0000
  -3   1   0 1110600   32944                                                      894434   -2.76    0.00  1.0000
  -3   2 -17 2020902  235124                                                     1979926   -0.37    0.00  1.0000
  -3   2 -17 2094404  207115                                                     2052686   -0.37    0.00  1.0000
  -3   2 -16   98512  113304                                                      112464   -0.56    0.00  1.0000
  -3   2 -16  283917  116379                                                      307298   -0.56    0.00  1.0000
  -3   2 -15 1171233  158542                                                     1230919   -0.70    0.00  1.0000
  -3   2 -15 1261174  178717                                                     1323083   -0.70    0.00  1.0000
  -3   2 -14 6100573  321376                                                     5953503   -0.77    0.00  1.0000
  -3   2 -14 6015354  293640                                                     5869322   -0.77    0.00  1.0000
  -3   2 -13 3480425  247043                                                     3589844   -0.74    0.00  1.0000
  -3   2 -13 3501711  230123                                                     3611461   -0.74    0.00  1.0000
  -3   2 -12 1694210  177348                                                     1761390   -0.65    0.00  1.0000
  -3   2 -12 1826217  169727                                                     1895941   -0.65    0.00  1.0000
  -3   2 -11 9989209  352713                                                     9851594   -0.56    0.00  1.0000
  -3   2 -11 9725450  324377                                                     9589672   -0.56    0.00  1.0000
  -3   2 -10 2493867  169318                                                     2558714   -0.53    0.00  1.0000
  -3   2 -10 2580304  183809                                                     2646259   -0.53    0.00  1.0000
  -3   2  -9  714404  110261                                                      755856   -0.61    0.00  1.0000
  -3   2  -9  707072   97535                                                      748313   -0.61    0.00  1.0000
  -3   2  -813293069  321320                                                    13058402   -0.82    0.00  1.0000
  -3   2  -813667771  349332                                                    13429804   -0.82    0.00  1.0000
  -3   2  -724102346  437920                                                    24532790   -1.11    0.00  1.0000
  -3   2  -724100694  408748                                                    24531124   -1.11    0.00  1.0000
  -3   2  -6   86993   55164                                                       59137   -1.37    0.00  1.0000
  -3   2  -6   68743   53965                                                       44253   -1.37    0.00  1.0000
  -3   2  -5 4822738  160698                                                     4575907   -1.46    0.00  1.0000
  -3   2  -5 4802287  171226                                                     4555986   -1.46    0.00  1.0000
  -3   2  -438756368  418466                                                    39397800   -1.30    0.00  1.0000
  -3   2  -439514704  444532                                                    40162356   -1.30    0.00  1.0000
  -3   2  -3 5900843  156420                                                     5738346   -0.86    0.00  1.0000
  -3   2  -2  219052   43555                                                      213337   -0.19    0.00  1.0000
  -3   3 -17 1913165  226971                                                     1952977    0.37    0.00  1.0000
  -3   3 -17 1876358  208724                                                     1915786    0.37    0.00  1.0000
  -3   3 -16 2762856  247724                                                     2689887    0.57    0.00  1.0000
  -3   3 -16 2760261  233880                                                     2687327    0.57    0.00  1.0000
  -3   3 -15  338158  116155                                                      306291    0.72    0.00  1.0000
  -3   3 -15  277256  124059                                                      248474    0.72    0.00  1.0000
  -3   3 -14 3672538  267847                                                     3791762    0.79    0.00  1.0000
  -3   3 -14 3914105  252199                                                     4037156    0.79    0.00  1.0000
  -3   3 -13 2668465  205299                                                     2569303    0.79    0.00  1.0000
  -3   3 -13 2570507  216141                                                     2473200    0.79    0.00  1.0000
  -3   3 -12   16537   80904                                                       19930    0.75    0.00  1.0000
  -3   3 -12   87154   91794                                                       95633    0.75    0.00  1.0000
  -3   3 -11 1591318  162719                                                     1662257    0.72    0.00  1.0000
  -3   3 -11 1762871  153978                                                     1837498    0.72    0.00  1.0000
  -3   3 -1010412119  347953                                                    10217072    0.78    0.00  1.0000
  -3   3 -1010544381  330217                                                    10348095    0.78    0.00  1.0000
  -3   3  -9  418244   90503                                                      466963    0.96    0.00  1.0000
  -3   3  -9  320806   90145                                                      363631    0.96    0.00  1.0000
  -3   3  -810834575  327289                                                    11164566    1.26    0.00  1.0000
  -3   3  -810801953  313240                                                    11131451    1.26    0.00  1.0000
  -3   3  -717618116  361366                                                    17082182    1.64    0.00  1.0000
  -3   3  -717749496  376095                                                    17211552    1.64    0.00  1.0000
  -3   3  -6 6316866  217347                                                     6711471    1.97    0.00  1.0000
  -3   3  -6 6192052  226166                                                     6582797    1.97    0.00  1.0000
  -3   3  -5  266753   72486                                                      357379    2.13    0.00  1.0000
  -3   3  -419932256  334103                                                    19231486    2.02    0.00  1.0000
  -3   4 -17 1531832  207321                                                     1508393   -0.25    0.00  1.0000
  -3   4 -17 1798276  207011                                                     1772873   -0.25    0.00  1.0000
  -3   4 -16 2275038  233174                                                     2322197   -0.40    0.00  1.0000
  -3   4 -16 2402131  223756                                                     2450583   -0.40    0.00  1.0000
  -3   4 -15  283943  120535                                                      263132   -0.52    0.00  1.0000
  -3   4 -15  128504  111012                                                      114628   -0.52    0.00  1.0000
  -3   4 -14 1761251  190882                                                     1703143   -0.57    0.00  1.0000
  -3   4 -14 1757908  183560                                                     1699856   -0.57    0.00  1.0000
  -3   4 -13 5550799  303236                                                     5653270   -0.56    0.00  1.0000
  -3   4 -13 5492723  289726                                                     5594660   -0.56    0.00  1.0000
  -3   4 -12  980707  148370                                                      941439   -0.52    0.00  1.0000
  -3   4 -12 1178929  144399                                                     1135838   -0.52    0.00  1.0000
  -3   4 -11 1724574  166807                                                     1671695   -0.52    0.00  1.0000
  -3   4 -11 1977069  177578                                                     1920422   -0.52    0.00  1.0000
  -3   4 -10 5832716  277831                                                     5947217   -0.61    0.00  1.0000
  -3   4 -10 6093782  270163                                                     6210805   -0.61    0.00  1.0000
  -3   4  -9 4102365  209962                                                     3972956   -0.83    0.00  1.0000
  -3   4  -9 4280806  222016                                                     4148591   -0.83    0.00  1.0000
  -3   4  -8  286533   79661                                                      239190   -1.17    0.00  1.0000
  -3   4  -8  328066   79246                                                      277258   -1.17    0.00  1.0000
  -3   4  -7 8280744  284103                                                     8639406   -1.58    0.00  1.0000
  -3   4  -7 8373413  277833                                                     8734055   -1.58    0.00  1.0000
  -3   4  -621234542  414291                                                    20542912   -1.93    0.00  1.0000
  -3   5 -17  101237  113697                                                      104367    0.13    0.00  1.0000
  -3   5 -17  119798  103805                                                      123201    0.13    0.00  1.0000
  -3   5 -16 2001829  225419                                                     1977078    0.23    0.00  1.0000
  -3   5 -16 2359665  234027                                                     2332786    0.23    0.00  1.0000
  -3   5 -15 2190716  226145                                                     2223563    0.28    0.00  1.0000
  -3   5 -15 2284100  217827                                                     2317637    0.28    0.00  1.0000
  -3   5 -14  155732  116203                                                      164606    0.28    0.00  1.0000
  -3   5 -14  191966  102562                                                      201806    0.28    0.00  1.0000
  -3   5 -13 4919819  289081                                                     4879851    0.23    0.00  1.0000
  -3   5 -13 5163512  288917                                                     5122564    0.23    0.00  1.0000
  -3   5 -12 5860471  298547                                                     5891818    0.17    0.00  1.0000
  -3   5 -12 6139909  314529                                                     6171994    0.17    0.00  1.0000
  -3   5 -11      30   85033                                                      -13707    0.14    0.00  1.0000
  -3   5 -11   24507   87754                                                       25936    0.14    0.00  1.0000
  -3   5 -10  511103  110237                                                      500507    0.21    0.00  1.0000
  -3   5 -10  455155  108985                                                      445158    0.21    0.00  1.0000
  -3   5  -914083227  418237                                                    14202314    0.40    0.00  1.0000
  -3   5  -913464612  402984                                                    13581064    0.40    0.00  1.0000
  -3   5  -8  680078  110723                                                      635516    0.72    0.00  1.0000
  -3   5  -7 3109396  187207                                                     2961504    1.08    0.00  1.0000
  -3   6 -16 2117812  224461                                                     2130974   -0.12    0.00  1.0000
  -3   6 -16 2123355  234999                                                     2136534   -0.12    0.00  1.0000
  -3   6 -15 1260500  187687                                                     1249472   -0.13    0.00  1.0000
  -3   6 -15 1198705  178283                                                     1187951   -0.13    0.00  1.0000
  -3   6 -14  591877  138002                                                      597221   -0.09    0.00  1.0000
  -3   6 -14  362526  130625                                                      366712   -0.09    0.00  1.0000
  -3   6 -13  453412  122477                                                      453622    0.00    0.00  1.0000
  -3   6 -13  358629  132577                                                      358816    0.00    0.00  1.0000
  -3   6 -12 8508138  385171                                                     8529638    0.09    0.00  1.0000
  -3   6 -12 7946840  361254                                                     7967620    0.09    0.00  1.0000
  -3   6 -11 2612472  220275                                                     2592693    0.16    0.00  1.0000
  -3   6 -11 2906185  219305                                                     2885321    0.16    0.00  1.0000
  -3   6 -10  356890  110047                                                      350728    0.13    0.00  1.0000
  -3   6 -10  299406  103198                                                      293765    0.13    0.00  1.0000
  -3   6  -9 3197378  224560                                                     3196734    0.00    0.00  1.0000
  -3   6  -8 3580894  223579                                                     3617127   -0.25    0.00  1.0000
  -3   7 -15 1216549  189417                                                     1219529    0.04    0.00  1.0000
  -3   7 -15 1543544  202748                                                     1546899    0.04    0.00  1.0000
  -3   7 -14 1731952  205511                                                     1733411   -0.01    0.00  1.0000
  -3   7 -14 1920037  211757                                                     1921573   -0.01    0.00  1.0000
  -3   7 -13      16   98363                                                       -4896   -0.10    0.00  1.0000
  -3   7 -13   93360  106807                                                       95843   -0.10    0.00  1.0000
  -3   7 -12 2428067  223950                                                     2403349   -0.20    0.00  1.0000
  -3   7 -12 2465448  223512                                                     2440539   -0.20    0.00  1.0000
  -3   7 -11 4174806  275631                                                     4219456   -0.28    0.00  1.0000
  -3   7 -11 4007768  271549                                                     4051517   -0.28    0.00  1.0000
  -3   7 -10   48498  110202                                                       43789   -0.28    0.00  1.0000
  -3   7  -9  331886  112777                                                      324236   -0.19    0.00  1.0000
  -3   8 -14 1080308  180955                                                     1075270    0.06    0.00  1.0000
  -3   8 -14 1469299  200685                                                     1463424    0.06    0.00  1.0000
  -3   8 -13  802088  167468                                                      811749    0.14    0.00  1.0000
  -3   8 -13  588522  152160                                                      596802    0.14    0.00  1.0000
  -3   8 -12  183711  113472                                                      190892    0.22    0.00  1.0000
  -3   8 -12  231299  113928                                                      239350    0.22    0.00  1.0000
  -3   8 -11 5418917  333648                                                     5366777    0.29    0.00  1.0000
  -3   8 -11 5269491  323698                                                     5218077    0.29    0.00  1.0000
  -3   8 -10 2463908  230755                                                     2500028    0.29    0.00  1.0000
  -3   9 -13 3199445  275891                                                     3182797   -0.12    0.00  1.0000
  -3   9 -13 2927331  284172                                                     2911408   -0.12    0.00  1.0000
  -3   9 -12   62008  123122                                                       58286   -0.19    0.00  1.0000
  -3   9 -12   32334  109164                                                       29662   -0.19    0.00  1.0000
  -3   9 -11 2653698  261613                                                     2685464   -0.25    0.00  1.0000
  -3  10 -11  518454  162516                                                      507815    0.19    0.00  1.0000
  -2 -11  -4 3969387  313252                                                     3962701    0.04    0.00  1.0000
  -2 -11  -4 3827867  296685                                                     3821302    0.04    0.00  1.0000
  -2 -11  -3  535675  156108                                                      541418    0.10    0.00  1.0000
  -2 -11  -3  473505  143477                                                      478905    0.10    0.00  1.0000
  -2 -11  -2  705637  163800                                                      713800    0.12    0.00  1.0000
  -2 -11  -2  634056  146246                                                      641795    0.12    0.00  1.0000
  -2 -11  -1 1485171  203642                                                     1476136    0.10    0.00  1.0000
  -2 -11  -1 1528996  196950                                                     1519828    0.10    0.00  1.0000
  -2 -11   0 1273578  188869                                                     1276111    0.03    0.00  1.0000
  -2 -11   0 1290178  184634                                                     1292727    0.03    0.00  1.0000
  -2 -11   1       3  105848                                                      -10353   -0.04    0.00  1.0000
  -2 -11   1  108670  114616                                                      109832   -0.04    0.00  1.0000
  -2 -11   2 1474389  199857                                                     1482396   -0.08    0.00  1.0000
  -2 -11   2 1970490  214599                                                     1979744   -0.08    0.00  1.0000
  -2 -11   3 2223215  229897                                                     2215838   -0.06    0.00  1.0000
  -2 -11   4  111416  111292                                                      111031    0.02    0.00  1.0000
  -2 -11   5  777060  174607                                                      768735    0.12    0.00  1.0000
  -2 -11   6 1624817  208492                                                     1646214    0.22    0.00  1.0000
  -2 -11   7  629107  149689                                                      612653    0.27    0.00  1.0000
  -2 -10  -7 1317287  191447                                                     1305964    0.13    0.00  1.0000
  -2 -10  -7 1226771  199974                                                     1215846    0.13    0.00  1.0000
  -2 -10  -6  791962  158907                                                      795818    0.06    0.00  1.0000
  -2 -10  -6 1134273  186419                                                     1138887    0.06    0.00  1.0000
  -2 -10  -5       2  108408                                                      -24834   -0.04    0.00  1.0000
  -2 -10  -5   81630  113869                                                       82428   -0.04    0.00  1.0000
  -2 -10  -4  795436  156221                                                      803633   -0.12    0.00  1.0000
  -2 -10  -4  886111  168460                                                      894762   -0.12    0.00  1.0000
  -2 -10  -3 4157227  286166                                                     4130881   -0.17    0.00  1.0000
  -2 -10  -3 3971452  299859                                                     3945703   -0.17    0.00  1.0000
  -2 -10  -2  598268  153455                                                      607300   -0.15    0.00  1.0000
  -2 -10  -2  617394  139336                                                      626569   -0.15    0.00  1.0000
  -2 -10  -1  993331  170882                                                      998201   -0.06    0.00  1.0000
  -2 -10  -1 1138748  171741                                                     1143962   -0.06    0.00  1.0000
  -2 -10   0 3662892  273695                                                     3672905    0.07    0.00  1.0000
  -2 -10   0 3807125  270978                                                     3817333    0.07    0.00  1.0000
  -2 -10   1  232997  115103                                                      226066    0.19    0.00  1.0000
  -2 -10   1  169235  119150                                                      163335    0.19    0.00  1.0000
  -2 -10   2   73891  102982                                                       68628    0.26    0.00  1.0000
  -2 -10   2   39122  102245                                                       35318    0.26    0.00  1.0000
  -2 -10   3 3708347  264871                                                     3744710    0.24    0.00  1.0000
  -2 -10   3 3363276  266436                                                     3397910    0.24    0.00  1.0000
  -2 -10   4 2103022  217032                                                     2086164    0.15    0.00  1.0000
  -2 -10   5   70079  112611                                                       69583    0.02    0.00  1.0000
  -2 -10   6 3654097  278231                                                     3641380   -0.08    0.00  1.0000
  -2 -10   7 1680546  201495                                                     1695357   -0.15    0.00  1.0000
  -2 -10   8      38  105020                                                      -50593   -0.16    0.00  1.0000
  -2 -10   9  711688  147391                                                      703188   -0.13    0.00  1.0000
  -2 -10  10 1604576  203117                                                     1613372   -0.09    0.00  1.0000
  -2  -9 -10 1405913  194072                                                     1420900   -0.16    0.00  1.0000
  -2  -9 -10 1610424  218409                                                     1626460   -0.16    0.00  1.0000
  -2  -9  -9 1079672  187422                                                     1063039   -0.21    0.00  1.0000
  -2  -9  -9 1128229  176572                                                     1111224   -0.21    0.00  1.0000
  -2  -9  -8      62   95981                                                       -8870   -0.20    0.00  1.0000
  -2  -9  -8      62  115536                                                      -16410   -0.20    0.00  1.0000
  -2  -9  -7 1087049  182429                                                     1097665   -0.13    0.00  1.0000
  -2  -9  -7 1122283  164509                                                     1133069   -0.13    0.00  1.0000
  -2  -9  -6 1292435  176536                                                     1290838   -0.02    0.00  1.0000
  -2  -9  -6 1402645  183132                                                     1400982   -0.02    0.00  1.0000
  -2  -9  -5  766455  152524                                                      759401    0.10    0.00  1.0000
  -2  -9  -5  617433  140969                                                      611104    0.10    0.00  1.0000
  -2  -9  -4  322581  121318                                                      314097    0.19    0.00  1.0000
  -2  -9  -4  372236  111152                                                      363119    0.19    0.00  1.0000
  -2  -9  -3 2450921  229163                                                     2477199    0.22    0.00  1.0000
  -2  -9  -3 2663316  223032                                                     2690705    0.22    0.00  1.0000
  -2  -9  -2 1567671  182170                                                     1553640    0.14    0.00  1.0000
  -2  -9  -2 1664703  198553                                                     1650244    0.14    0.00  1.0000
  -2  -9  -1       0  100902                                                      -59681   -0.01    0.00  1.0000
  -2  -9  -1       0  100677                                                      -57605   -0.01    0.00  1.0000
  -2  -9   0 4025005  259933                                                     3992195   -0.21    0.00  1.0000
  -2  -9   0 3792752  267104                                                     3760904   -0.21    0.00  1.0000
  -2  -9   1 1583144  177227                                                     1620507   -0.38    0.00  1.0000
  -2  -9   1 1542300  195329                                                     1579181   -0.38    0.00  1.0000
  -2  -9   2   32249  103811                                                       26146   -0.47    0.00  1.0000
  -2  -9   2     348   96277                                                      -62695   -0.47    0.00  1.0000
  -2  -9   3 2277591  209850                                                     2224609   -0.45    0.00  1.0000
  -2  -9   3 2311403  204531                                                     2258027   -0.45    0.00  1.0000
  -2  -9   4 2452687  222153                                                     2494832   -0.34    0.00  1.0000
  -2  -9   5  295826  118913                                                      287417   -0.20    0.00  1.0000
  -2  -9   6  625917  133372                                                      621209   -0.08    0.00  1.0000
  -2  -9   7 2618085  228345                                                     2618597    0.00    0.00  1.0000
  -2  -9   8 1369038  179095                                                     1370448    0.02    0.00  1.0000
  -2  -9   9  446170  125221                                                      446146    0.00    0.00  1.0000
  -2  -9  10 2985469  250374                                                     2989454   -0.03    0.00  1.0000
  -2  -9  11  884860  168466                                                      880878   -0.05    0.00  1.0000
  -2  -9  12   34517  107031                                                       33560   -0.07    0.00  1.0000
  -2  -8 -12 3434132  295404                                                     3448749    0.10    0.00  1.0000
  -2  -8 -12 2975815  266453                                                     2989424    0.10    0.00  1.0000
  -2  -8 -11  241579  114745                                                      234177    0.20    0.00  1.0000
  -2  -8 -11  302816  133172                                                      294522    0.20    0.00  1.0000
  -2  -8 -10  874571  154146                                                      854112    0.28    0.00  1.0000
  -2  -8 -10  947019  169124                                                      925725    0.28    0.00  1.0000
  -2  -8  -9 2345853  233313                                                     2383550    0.32    0.00  1.0000
  -2  -8  -9 2199645  215667                                                     2236152    0.32    0.00  1.0000
  -2  -8  -8 1831053  208797                                                     1801989    0.28    0.00  1.0000
  -2  -8  -8 1820807  192156                                                     1791824    0.28    0.00  1.0000
  -2  -8  -7   61545   98943                                                       58421    0.17    0.00  1.0000
  -2  -8  -7      42   99444                                                        -733    0.17    0.00  1.0000
  -2  -8  -6 4940427  285059                                                     4942370    0.01    0.00  1.0000
  -2  -8  -6 4937110  298723                                                     4939053    0.01    0.00  1.0000
  -2  -8  -5 3724962  252408                                                     3745543   -0.14    0.00  1.0000
  -2  -8  -5 3798550  264050                                                     3819333   -0.14    0.00  1.0000
  -2  -8  -4   57023   98026                                                       61320   -0.22    0.00  1.0000
  -2  -8  -4      79   90062                                                      -32022   -0.22    0.00  1.0000
  -2  -8  -3 1579404  165188                                                     1558912   -0.21    0.00  1.0000
  -2  -8  -3 1558865  175648                                                     1538507   -0.21    0.00  1.0000
  -2  -8  -2 5944971  307191                                                     5960578   -0.08    0.00  1.0000
  -2  -8  -2 5864016  298958                                                     5879517   -0.08    0.00  1.0000
  -2  -8  -1 2094248  189423                                                     2110190    0.14    0.00  1.0000
  -2  -8  -1 2274530  204885                                                     2291142    0.14    0.00  1.0000
  -2  -8   0 3832532  254079                                                     3892834    0.39    0.00  1.0000
  -2  -8   0 4092555  246640                                                     4154862    0.39    0.00  1.0000
  -2  -8   1 6549013  311092                                                     6431356    0.59    0.00  1.0000
  -2  -8   1 6425705  303151                                                     6309166    0.59    0.00  1.0000
  -2  -8   2     718  106754                                                      -73837    0.68    0.00  1.0000
  -2  -8   2     718   95034                                                      -59377    0.68    0.00  1.0000
  -2  -8   3     630  109618                                                      -71368    0.64    0.00  1.0000
  -2  -8   3   74303   92404                                                       61645    0.64    0.00  1.0000
  -2  -8   4 3042718  219790                                                     2976078    0.50    0.00  1.0000
  -2  -8   5 3074015  228352                                                     3118067    0.32    0.00  1.0000
  -2  -8   6      46   95037                                                      -20954    0.17    0.00  1.0000
  -2  -8   7 3978737  253599                                                     3966154    0.08    0.00  1.0000
  -2  -8   8 2704939  219616                                                     2711368    0.05    0.00  1.0000
  -2  -8   9   13855   87461                                                       13546    0.06    0.00  1.0000
  -2  -8  10 1033970  160224                                                     1026435    0.10    0.00  1.0000
  -2  -8  11 4011412  282406                                                     4031885    0.13    0.00  1.0000
  -2  -8  12  334753  120771                                                      328048    0.15    0.00  1.0000
  -2  -8  13  634892  154175                                                      625845    0.15    0.00  1.0000
  -2  -8  14 1181370  190549                                                     1190846    0.11    0.00  1.0000
  -2  -7 -13  123524  113442                                                      126690   -0.11    0.00  1.0000
  -2  -7 -13  252427  122996                                                      256944   -0.11    0.00  1.0000
  -2  -7 -12 2424462  241521                                                     2398334   -0.22    0.00  1.0000
  -2  -7 -12 2341404  230981                                                     2315728   -0.22    0.00  1.0000
  -2  -7 -11 2711279  230011                                                     2755421   -0.34    0.00  1.0000
  -2  -7 -11 2745406  256900                                                     2789824   -0.34    0.00  1.0000
  -2  -7 -10     308  104273                                                      -31008   -0.44    0.00  1.0000
  -2  -7 -10     308  106474                                                      -68028   -0.44    0.00  1.0000
  -2  -7  -9 5014386  302024                                                     4930902   -0.48    0.00  1.0000
  -2  -7  -9 5037957  288544                                                     4954277   -0.48    0.00  1.0000
  -2  -7  -8 3353279  249553                                                     3413195   -0.42    0.00  1.0000
  -2  -7  -8 3653459  244205                                                     3715988   -0.42    0.00  1.0000
  -2  -7  -7     123   98420                                                      -21635   -0.28    0.00  1.0000
  -2  -7  -7   84380   95069                                                       78533   -0.28    0.00  1.0000
  -2  -7  -6 1745709  172361                                                     1734819   -0.11    0.00  1.0000
  -2  -7  -6 1868472  185884                                                     1857206   -0.11    0.00  1.0000
  -2  -7  -5 4157519  238034                                                     4150530    0.04    0.00  1.0000
  -2  -7  -5 4186128  249992                                                     4179115    0.04    0.00  1.0000
  -2  -7  -4 2388277  196376                                                     2401410    0.11    0.00  1.0000
  -2  -7  -4 2128589  179755                                                     2140988    0.11    0.00  1.0000
  -2  -7  -3  495534  110159                                                      498070    0.05    0.00  1.0000
  -2  -7  -3  489465  107314                                                      491986    0.05    0.00  1.0000
  -2  -7  -210864658  373239                                                    10902144   -0.14    0.00  1.0000
  -2  -7  -211590236  371906                                                    11628950   -0.14    0.00  1.0000
  -2  -7  -1 4146286  239453                                                     4079285   -0.42    0.00  1.0000
  -2  -7  -1 4207863  228093                                                     4140364   -0.42    0.00  1.0000
  -2  -7   0   28709   73537                                                       20699   -0.71    0.00  1.0000
  -2  -7   0     777   88069                                                      -43550   -0.71    0.00  1.0000
  -2  -7   1 3854687  235760                                                     3994634   -0.91    0.00  1.0000
  -2  -7   1 3990184  226571                                                     4132548   -0.91    0.00  1.0000
  -2  -7   2 2708706  192486                                                     2587951   -0.96    0.00  1.0000
  -2  -7   2 2983642  190950                                                     2856842   -0.96    0.00  1.0000
  -2  -7   3 1298398  149830                                                     1377095   -0.86    0.00  1.0000
  -2  -7   3 1164866  144910                                                     1239468   -0.86    0.00  1.0000
  -2  -7   4 2732430  201872                                                     2817940   -0.66    0.00  1.0000
  -2  -7   5 6084765  279119                                                     6004191   -0.42    0.00  1.0000
  -2  -7   6  992976  141154                                                     1009838   -0.22    0.00  1.0000
  -2  -7   7  755048  129279                                                      760794   -0.08    0.00  1.0000
  -2  -7   8 4076917  248821                                                     4071711   -0.03    0.00  1.0000
  -2  -7   9 3464993  235245                                                     3471805   -0.05    0.00  1.0000
  -2  -7  10  389750  120599                                                      394755   -0.10    0.00  1.0000
  -2  -7  11 3586122  252325                                                     3560698   -0.17    0.00  1.0000
  -2  -7  12 1376306  180865                                                     1397205   -0.23    0.00  1.0000
  -2  -7  13   54894   98985                                                       51161   -0.25    0.00  1.0000
  -2  -7  14  347907  129562                                                      338085   -0.23    0.00  1.0000
  -2  -7  15 2770347  264209                                                     2794020   -0.18    0.00  1.0000
  -2  -6 -14 1767948  203534                                                     1755376    0.12    0.00  1.0000
  -2  -6 -14 1998323  226015                                                     1984956    0.12    0.00  1.0000
  -2  -6 -13  849194  156529                                                      866121    0.23    0.00  1.0000
  -2  -6 -13 1003721  172809                                                     1022116    0.23    0.00  1.0000
  -2  -6 -12 3146693  248277                                                     3201491    0.39    0.00  1.0000
  -2  -6 -12 3213333  260325                                                     3268706    0.39    0.00  1.0000
  -2  -6 -11 6405980  332161                                                     6294077    0.57    0.00  1.0000
  -2  -6 -11 6638230  320366                                                     6524308    0.57    0.00  1.0000
  -2  -6 -10  140530   95754                                                      159830    0.70    0.00  1.0000
  -2  -6 -10  128422  113099                                                      146893    0.70    0.00  1.0000
  -2  -6  -9  839079  145731                                                      893784    0.75    0.00  1.0000
  -2  -6  -9  661836  127446                                                      710514    0.75    0.00  1.0000
  -2  -6  -8 4183980  253107                                                     4073650    0.70    0.00  1.0000
  -2  -6  -8 3940195  228464                                                     3833148    0.70    0.00  1.0000
  -2  -6  -7 5854148  292016                                                     5961426    0.56    0.00  1.0000
  -2  -6  -7 5846597  274930                                                     5953806    0.56    0.00  1.0000
  -2  -6  -6  105834   89482                                                      116214    0.40    0.00  1.0000
  -2  -6  -6   79086   73080                                                       88091    0.40    0.00  1.0000
  -2  -6  -511905321  373161                                                    11829990    0.28    0.00  1.0000
  -2  -6  -512084280  364155                                                    12008381    0.28    0.00  1.0000
  -2  -6  -4 3926365  220848                                                     3967624    0.27    0.00  1.0000
  -2  -6  -4 3782019  205761                                                     3822514    0.27    0.00  1.0000
  -2  -6  -3     250   76613                                                      -33231    0.40    0.00  1.0000
  -2  -6  -3     250   76569                                                      -18968    0.40    0.00  1.0000
  -2  -6  -2 6651004  268186                                                     6516794    0.67    0.00  1.0000
  -2  -6  -2 6384626  258288                                                     6253145    0.67    0.00  1.0000
  -2  -6  -111632697  345391                                                    11903113    1.01    0.00  1.0000
  -2  -6  -111435733  354022                                                    11703861    1.01    0.00  1.0000
  -2  -6   0 4351132  208182                                                     4137244    1.32    0.00  1.0000
  -2  -6   0 4153339  218921                                                     3944431    1.32    0.00  1.0000
  -2  -6   1 4025796  210302                                                     3791807    1.51    0.00  1.0000
  -2  -6   1 4025843  201359                                                     3791853    1.51    0.00  1.0000
  -2  -6   2 9871402  320223                                                    10247309    1.51    0.00  1.0000
  -2  -6   210098005  332847                                                    10478162    1.51    0.00  1.0000
  -2  -6   3  648574   98164                                                      570717    1.33    0.00  1.0000
  -2  -6   3  556655   89165                                                      484689    1.33    0.00  1.0000
  -2  -6   4   63299   75386                                                       84599    1.03    0.00  1.0000
  -2  -6   5 7687416  291379                                                     7834977    0.68    0.00  1.0000
  -2  -6   611441427  355680                                                    11343578    0.37    0.00  1.0000
  -2  -6   7      36   79851                                                       -4684    0.15    0.00  1.0000
  -2  -6   8 6737737  289137                                                     6747146    0.05    0.00  1.0000
  -2  -6   9 6409189  294875                                                     6401224    0.04    0.00  1.0000
  -2  -6  10  822282  144079                                                      829989    0.11    0.00  1.0000
  -2  -6  11  989655  149299                                                     1005919    0.21    0.00  1.0000
  -2  -6  12 6565436  338131                                                     6504508    0.30    0.00  1.0000
  -2  -6  13 1728247  191432                                                     1764875    0.35    0.00  1.0000
  -2  -6  14  295628  117977                                                      310336    0.35    0.00  1.0000
  -2  -6  15 2367018  242371                                                     2331604    0.30    0.00  1.0000
  -2  -5 -15  743644  150454                                                      732971   -0.16    0.00  1.0000
  -2  -5 -15  620445  164455                                                      610699   -0.16    0.00  1.0000
  -2  -5 -14 2496421  222650                                                     2530735   -0.28    0.00  1.0000
  -2  -5 -14 2382835  235118                                                     2416362   -0.28    0.00  1.0000
  -2  -5 -13 2362920  231038                                                     2307715   -0.46    0.00  1.0000
  -2  -5 -13 2646975  222467                                                     2588527   -0.46    0.00  1.0000
  -2  -5 -12  149537  105686                                                      129308   -0.69    0.00  1.0000
  -2  -5 -12  259300  107711                                                      232435   -0.69    0.00  1.0000
  -2  -5 -11 3363815  246767                                                     3497952   -0.93    0.00  1.0000
  -2  -5 -11 3336364  231526                                                     3469957   -0.93    0.00  1.0000
  -2  -5 -10 3220542  231156                                                     3067121   -1.12    0.00  1.0000
  -2  -5 -10 2980087  206712                                                     2832573   -1.12    0.00  1.0000
  -2  -5  -9  812827  124909                                                      900522   -1.20    0.00  1.0000
  -2  -5  -9  879935  136998                                                      971088   -1.20    0.00  1.0000
  -2  -5  -8 3584965  226284                                                     3760480   -1.18    0.00  1.0000
  -2  -5  -8 3289193  209619                                                     3457399   -1.18    0.00  1.0000
  -2  -5  -711116886  335068                                                    10838853   -1.07    0.00  1.0000
  -2  -5  -710910603  358406                                                    10635178   -1.07    0.00  1.0000
  -2  -5  -6  608261  100961                                                      667496   -0.95    0.00  1.0000
  -2  -5  -6  517644  107881                                                      572392   -0.95    0.00  1.0000
  -2  -5  -5 1418537  131340                                                     1503036   -0.90    0.00  1.0000
  -2  -5  -5 1558460  140152                                                     1646972   -0.90    0.00  1.0000
  -2  -5  -412219155  337694                                                    11952104   -0.98    0.00  1.0000
  -2  -5  -412379533  322205                                                    12110726   -0.98    0.00  1.0000
  -2  -5  -3 5772965  232058                                                     6005357   -1.22    0.00  1.0000
  -2  -5  -3 6357902  251410                                                     6601673   -1.22    0.00  1.0000
  -2  -5  -2  484885   92112                                                      575218   -1.59    0.00  1.0000
  -2  -5  -2  593557   99836                                                      693101   -1.59    0.00  1.0000
  -2  -5  -119301228  401337                                                    18610236   -2.02    0.00  1.0000
  -2  -5  -119525222  392090                                                    18830196   -2.02    0.00  1.0000
  -2  -5   010444428  300700                                                    11058571   -2.39    0.00  1.0000
  -2  -5   0 9753221  302448                                                    10346988   -2.39    0.00  1.0000
  -2  -5   1  278013   77936                                                      395737   -2.58    0.00  1.0000
  -2  -5   1  220296   81848                                                      326227   -2.58    0.00  1.0000
  -2  -5   2 2508677  145867                                                     2210702   -2.53    0.00  1.0000
  -2  -5   2 2459901  153152                                                     2164923   -2.53    0.00  1.0000
  -2  -5   3 7302125  264234                                                     7784986   -2.25    0.00  1.0000
  -2  -5   3 7870297  266254                                                     8371304   -2.25    0.00  1.0000
  -2  -5   4 1418765  124032                                                     1254344   -1.81    0.00  1.0000
  -2  -5   5 9548613  287919                                                     9234540   -1.30    0.00  1.0000
  -2  -5   614452031  368277                                                    14703480   -0.84    0.00  1.0000
  -2  -5   7 1671550  147301                                                     1622764   -0.49    0.00  1.0000
  -2  -5   8 1177180  134249                                                     1153833   -0.28    0.00  1.0000
  -2  -5   9 8756400  320228                                                     8804891   -0.21    0.00  1.0000
  -2  -5  10 4938154  255034                                                     4894985   -0.25    0.00  1.0000
  -2  -5  11     183   92670                                                      -16836   -0.34    0.00  1.0000
  -2  -5  12 3438240  241909                                                     3500830   -0.43    0.00  1.0000
  -2  -5  13 4180914  267431                                                     4105735   -0.47    0.00  1.0000
  -2  -4 -16 1560687  193263                                                     1579105    0.19    0.00  1.0000
  -2  -4 -16 1277551  185789                                                     1294221    0.19    0.00  1.0000
  -2  -4 -15   20985   97296                                                       24789    0.32    0.00  1.0000
  -2  -4 -15   96379  107158                                                      104351    0.32    0.00  1.0000
  -2  -4 -14 2556546  213232                                                     2494014    0.51    0.00  1.0000
  -2  -4 -14 2704266  230485                                                     2639942    0.51    0.00  1.0000
  -2  -4 -13  821347  155923                                                      872281    0.76    0.00  1.0000
  -2  -4 -13  747453  137159                                                      796071    0.76    0.00  1.0000
  -2  -4 -12 1400226  164847                                                     1303365    1.06    0.00  1.0000
  -2  -4 -12 1456859  155313                                                     1358025    1.06    0.00  1.0000
  -2  -4 -11  366454   98063                                                      310027    1.36    0.00  1.0000
  -2  -4 -11  217958   94583                                                      174859    1.36    0.00  1.0000
  -2  -4 -1010578176  357601                                                    10992052    1.61    0.00  1.0000
  -2  -4 -1010636197  379782                                                    11051193    1.61    0.00  1.0000
  -2  -4  -9 5818042  247809                                                     5490512    1.75    0.00  1.0000
  -2  -4  -9 5732001  268621                                                     5406936    1.75    0.00  1.0000
  -2  -4  -8 2577780  174055                                                     2356418    1.79    0.00  1.0000
  -2  -4  -8 2430028  153407                                                     2215247    1.79    0.00  1.0000
  -2  -4  -712523345  368521                                                    13019515    1.77    0.00  1.0000
  -2  -4  -712213713  337573                                                    12703768    1.77    0.00  1.0000
  -2  -4  -6 6729878  231749                                                     6377941    1.76    0.00  1.0000
  -2  -4  -6 6833908  252761                                                     6479225    1.76    0.00  1.0000
  -2  -4  -5 1169510  120029                                                     1331276    1.83    0.00  1.0000
  -2  -4  -5 1106802  110879                                                     1264314    1.83    0.00  1.0000
  -2  -4  -415770198  337594                                                    16420333    2.06    0.00  1.0000
  -2  -4  -415485335  360543                                                    16129628    2.06    0.00  1.0000
  -2  -4  -3 6020145  198014                                                     5559424    2.47    0.00  1.0000
  -2  -4  -3 5728703  205276                                                     5279490    2.47    0.00  1.0000
  -2  -4  -2 1554611  132402                                                     1863432    3.00    0.00  1.0000
  -2  -4  -2 1420659  121987                                                     1716489    3.00    0.00  1.0000
  -2  -4  -1 4456971  200418                                                     5064711    3.57    0.00  1.0000
  -2  -4  -1 4929730  198187                                                     5567907    3.57    0.00  1.0000
  -2  -4   017644506  325250                                                    16345649    4.02    0.00  1.0000
  -2  -4   016927466  334192                                                    15655776    4.02    0.00  1.0000
  -2  -4   1 7682957  241497                                                     8634665    4.24    0.00  1.0000
  -2  -4   1 7808775  253663                                                     8768019    4.24    0.00  1.0000
  -2  -4   2 4586323  190285                                                     5308379    4.14    0.00  1.0000
  -2  -4   2 4195123  194502                                                     4886835    4.14    0.00  1.0000
  -2  -4   329205820  436235                                                    27638586    3.74    0.00  1.0000
  -2  -4   4 1874355  138504                                                     2219791    3.12    0.00  1.0000
  -2  -4   5 8398560  261289                                                     8959832    2.41    0.00  1.0000
  -2  -4   6 7794027  247803                                                     7417508    1.75    0.00  1.0000
  -2  -4   7 9688708  296558                                                     9987190    1.21    0.00  1.0000
  -2  -4   8  964746  115381                                                      899092    0.86    0.00  1.0000
  -2  -4   912043519  351499                                                    11856621    0.69    0.00  1.0000
  -2  -4  10 2859391  195695                                                     2944826    0.65    0.00  1.0000
  -2  -4  11     731   94171                                                      -68212    0.68    0.00  1.0000
  -2  -4  12 1621302  167106                                                     1550838    0.72    0.00  1.0000
  -2  -3 -17  708525  151616                                                      719803   -0.17    0.00  1.0000
  -2  -3 -17  550379  151065                                                      560325   -0.17    0.00  1.0000
  -2  -3 -16 1897578  218575                                                     1867098   -0.29    0.00  1.0000
  -2  -3 -16 2491432  219667                                                     2456491   -0.29    0.00  1.0000
  -2  -3 -15  843318  152924                                                      875301   -0.44    0.00  1.0000
  -2  -3 -15  919990  170820                                                      953382   -0.44    0.00  1.0000
  -2  -3 -14 3449311  248253                                                     3547534   -0.67    0.00  1.0000
  -2  -3 -14 3650530  264502                                                     3751557   -0.67    0.00  1.0000
  -2  -3 -13 4237988  250219                                                     4084875   -0.97    0.00  1.0000
  -2  -3 -13 4774130  280788                                                     4611536   -0.97    0.00  1.0000
  -2  -3 -12  617210  117747                                                      697362   -1.32    0.00  1.0000
  -2  -3 -12  637174  138905                                                      718576   -1.32    0.00  1.0000
  -2  -3 -11   50023   83842                                                       25125   -1.68    0.00  1.0000
  -2  -3 -11    4400   95505                                                     -106767   -1.68    0.00  1.0000
  -2  -3 -10 6406734  258872                                                     6018719   -1.99    0.00  1.0000
  -2  -3 -10 6436007  279487                                                     6047092   -1.99    0.00  1.0000
  -2  -3  -913846187  372832                                                    14504182   -2.23    0.00  1.0000
  -2  -3  -913702641  394729                                                    14357254   -2.23    0.00  1.0000
  -2  -3  -8    8824   61795                                                       -1001   -2.38    0.00  1.0000
  -2  -3  -8    8824   72321                                                      -19227   -2.38    0.00  1.0000
  -2  -3  -712079250  299068                                                    11406506   -2.50    0.00  1.0000
  -2  -3  -712134310  322980                                                    11460013   -2.50    0.00  1.0000
  -2  -3  -611437468  291406                                                    12151810   -2.66    0.00  1.0000
  -2  -3  -611704168  319278                                                    12426669   -2.66    0.00  1.0000
  -2  -3  -5  176085   67681                                                       97156   -2.94    0.00  1.0000
  -2  -3  -5  248283   56151                                                      152736   -2.94    0.00  1.0000
  -2  -3  -4  611642   77584                                                      430370   -3.39    0.00  1.0000
  -2  -3  -4  755477   73925                                                      552479   -3.39    0.00  1.0000
  -2  -3  -3 8978593  227352                                                     9943668   -4.03    0.00  1.0000
  -2  -3  -3 8746732  244411                                                     9699576   -4.03    0.00  1.0000
  -2  -3  -2 6505269  169231                                                     5585025   -4.79    0.00  1.0000
  -2  -3  -2 6453813  180717                                                     5537352   -4.79    0.00  1.0000
  -2  -3  -1 3107621  122444                                                     2386912   -5.54    0.00  1.0000
  -2  -3  -1 3126285  116994                                                     2403273   -5.54    0.00  1.0000
  -2  -3   030221434  397641                                                    32919440   -6.11    0.00  1.0000
  -2  -3   030057430  410686                                                    32748258   -6.11    0.00  1.0000
  -2  -3   129754348  381498                                                    27090960   -6.35    0.00  1.0000
  -2  -3   129426782  361178                                                    26778440   -6.35    0.00  1.0000
  -2  -3   2  124834   49927                                                       12261   -6.18    0.00  1.0000
  -2  -3   2   59614   55391                                                      -25935   -6.18    0.00  1.0000
  -2  -3   334013364  439806                                                    36649668   -5.63    0.00  1.0000
  -2  -3   426463676  371308                                                    24557634   -4.80    0.00  1.0000
  -2  -3   5 1498163   98378                                                     1151241   -3.86    0.00  1.0000
  -2  -3   6 2554266  148671                                                     2935827   -2.96    0.00  1.0000
  -2  -3   7 4421702  181074                                                     4068060   -2.23    0.00  1.0000
  -2  -3   8 4232413  202077                                                     4513585   -1.72    0.00  1.0000
  -2  -3   9  320861   89296                                                      384862   -1.42    0.00  1.0000
  -2  -3  1013787869  379853                                                    13417942   -1.28    0.00  1.0000
  -2  -2 -17      83  130386                                                      -67760    0.23    0.00  1.0000
  -2  -2 -17   19515  101939                                                       21981    0.23    0.00  1.0000
  -2  -2 -16 3469275  254970                                                     3517191    0.33    0.00  1.0000
  -2  -2 -16 3557895  270541                                                     3606417    0.33    0.00  1.0000
  -2  -2 -15 3821734  279619                                                     3750133    0.47    0.00  1.0000
  -2  -2 -15 3656035  252658                                                     3586012    0.47    0.00  1.0000
  -2  -2 -14   69825   91750                                                       56325    0.69    0.00  1.0000
  -2  -2 -14  217716   97556                                                      193334    0.69    0.00  1.0000
  -2  -2 -13 4867987  263688                                                     5040746    0.99    0.00  1.0000
  -2  -2 -13 4915687  285057                                                     5089282    0.99    0.00  1.0000
  -2  -2 -12 7666800  323817                                                     7375410    1.36    0.00  1.0000
  -2  -2 -12 7405749  294163                                                     7119411    1.36    0.00  1.0000
  -2  -2 -11 4194270  225722                                                     4481575    1.75    0.00  1.0000
  -2  -2 -11 4296744  245137                                                     4587480    1.75    0.00  1.0000
  -2  -2 -10 5193601  259260                                                     5579814    2.12    0.00  1.0000
  -2  -2 -10 4916460  231082                                                     5292412    2.12    0.00  1.0000
  -2  -2  -913707319  335711                                                    13010653    2.43    0.00  1.0000
  -2  -2  -914616302  373953                                                    13896613    2.43    0.00  1.0000
  -2  -2  -8 3571473  198858                                                     3981954    2.70    0.00  1.0000
  -2  -2  -8 3518044  180516                                                     3925525    2.70    0.00  1.0000
  -2  -2  -7 6349886  242330                                                     6955017    2.98    0.00  1.0000
  -2  -2  -7 6192850  218483                                                     6790623    2.98    0.00  1.0000
  -2  -2  -615416061  293157                                                    14409684    3.33    0.00  1.0000
  -2  -2  -615817546  327380                                                    14797932    3.33    0.00  1.0000
  -2  -2  -5 6827756  202295                                                     7630379    3.83    0.00  1.0000
  -2  -2  -5 6988781  225465                                                     7800560    3.83    0.00  1.0000
  -2  -2  -4  450665   72108                                                      722577    4.53    0.00  1.0000
  -2  -2  -4  466909   83527                                                      743108    4.53    0.00  1.0000
  -2  -2  -321617188  306143                                                    19682918    5.42    0.00  1.0000
  -2  -2  -321845450  274054                                                    19900758    5.42    0.00  1.0000
  -2  -2  -2 5739807  155829                                                     6991177    6.42    0.00  1.0000
  -2  -2  -2 5781506  173390                                                     7037199    6.42    0.00  1.0000
  -2  -2  -1  378418   62939                                                      812524    7.35    0.00  1.0000
  -2  -2  -1  330796   69737                                                      741843    7.35    0.00  1.0000
  -2  -2   0 9344563  156968                                                     7517717    8.03    0.00  1.0000
  -2  -2   0 8994123  165471                                                     7203714    8.03    0.00  1.0000
  -2  -2   176541088  500148                                                    82362832    8.29    0.00  1.0000
  -2  -2   175850824  550000                                                    81646744    8.29    0.00  1.0000
  -2  -2   222099750  267044                                                    19221034    8.04    0.00  1.0000
  -2  -2   3 6220722  140637                                                     4867550    7.33    0.00  1.0000
  -2  -2   4 8979266  215858                                                    10508399    6.29    0.00  1.0000
  -2  -2   5 7361150  184997                                                     6312953    5.13    0.00  1.0000
  -2  -2   6    6547   58728                                                       15995    4.03    0.00  1.0000
  -2  -2   7 9070608  257664                                                     9823948    3.14    0.00  1.0000
  -2  -2   811741745  300488                                                    11081809    2.50    0.00  1.0000
  -2  -1 -18 2391264  246216                                                     2415528   -0.20    0.00  1.0000
  -2  -1 -18 2746930  243768                                                     2772933   -0.20    0.00  1.0000
  -2  -1 -17  385522  127359                                                      373753   -0.24    0.00  1.0000
  -2  -1 -17  634688  133139                                                      619561   -0.24    0.00  1.0000
  -2  -1 -16 1010550  163694                                                      987368   -0.30    0.00  1.0000
  -2  -1 -16 1047795  152399                                                     1024187   -0.30    0.00  1.0000
  -2  -1 -15 4721149  301918                                                     4789367   -0.40    0.00  1.0000
  -2  -1 -15 4734054  277602                                                     4802365   -0.40    0.00  1.0000
  -2  -1 -14 2420192  212914                                                     2349798   -0.58    0.00  1.0000
  -2  -1 -14 2369700  191821                                                     2300050   -0.58    0.00  1.0000
  -2  -1 -13  140426   80859                                                      117280   -0.86    0.00  1.0000
  -2  -1 -13  274954  105256                                                      242192   -0.86    0.00  1.0000
  -2  -1 -1210243171  377251                                                    10546497   -1.20    0.00  1.0000
  -2  -1 -12 9898377  345038                                                    10196591   -1.20    0.00  1.0000
  -2  -1 -11 4474217  229647                                                     4218108   -1.58    0.00  1.0000
  -2  -1 -11 4535650  215450                                                     4277764   -1.58    0.00  1.0000
  -2  -1 -10    5857   74874                                                      -34160   -1.94    0.00  1.0000
  -2  -1 -10    5857   83689                                                       -7702   -1.94    0.00  1.0000
  -2  -1  -9 2968729  171417                                                     3276795   -2.27    0.00  1.0000
  -2  -1  -9 2814785  182729                                                     3114946   -2.27    0.00  1.0000
  -2  -1  -815355349  348964                                                    14574912   -2.57    0.00  1.0000
  -2  -1  -815435749  324388                                                    14653247   -2.57    0.00  1.0000
  -2  -1  -7 1367897  113589                                                     1648562   -2.91    0.00  1.0000
  -2  -1  -7 1434781  128126                                                     1721913   -2.91    0.00  1.0000
  -2  -1  -611682610  260189                                                    12599092   -3.35    0.00  1.0000
  -2  -1  -611974815  293731                                                    12902476   -3.35    0.00  1.0000
  -2  -1  -511242068  242636                                                    10227964   -3.97    0.00  1.0000
  -2  -1  -510831809  211145                                                     9836809   -3.97    0.00  1.0000
  -2  -1  -4 1129802   81939                                                     1559957   -4.82    0.00  1.0000
  -2  -1  -4 1048489   95164                                                     1464084   -4.82    0.00  1.0000
  -2  -1  -3 1942947  109327                                                     2634473   -5.88    0.00  1.0000
  -2  -1  -3 1940996   93934                                                     2632201   -5.88    0.00  1.0000
  -2  -1  -2 8718934  126393                                                     7181673   -7.04    0.00  1.0000
  -2  -1  -2 8774883  152365                                                     7232467   -7.04    0.00  1.0000
  -2  -1  -1 3808485   93486                                                     5131350   -8.10    0.00  1.0000
  -2  -1  -1 3740067  113772                                                     5051850   -8.10    0.00  1.0000
  -2  -1   0 3415266   87607                                                     4825331   -8.85    0.00  1.0000
  -2  -1   0 3317887  104384                                                     4709443   -8.85    0.00  1.0000
  -2  -1   138100672  268746                                                    33811248   -9.10    0.00  1.0000
  -2  -1   2 3831260  111306                                                     5267159   -8.78    0.00  1.0000
  -2  -1   3 6948149  124580                                                     5389621   -7.96    0.00  1.0000
  -2  -1   4  200364   54391                                                      371818   -6.82    0.00  1.0000
  -2  -1   513622314  256983                                                    15273270   -5.56    0.00  1.0000
  -2  -1   6  964467   82798                                                      659932   -4.39    0.00  1.0000
  -2   0 -18 2095997  222682                                                     2079029    0.15    0.00  1.0000
  -2   0 -18 2148472  230834                                                     2131292    0.15    0.00  1.0000
  -2   0 -17 2922951  262234                                                     2942432    0.15    0.00  1.0000
  -2   0 -17 3106044  246996                                                     3126126    0.15    0.00  1.0000
  -2   0 -16      36  117245                                                      -71008    0.15    0.00  1.0000
  -2   0 -16   66526   96199                                                       63523    0.15    0.00  1.0000
  -2   0 -15 5051054  288596                                                     5014493    0.21    0.00  1.0000
  -2   0 -15 5039224  303837                                                     5002707    0.21    0.00  1.0000
  -2   0 -14 4922413  285139                                                     4982605    0.35    0.00  1.0000
  -2   0 -14 4973081  269164                                                     5033580    0.35    0.00  1.0000
  -2   0 -13     510   93680                                                      -63482    0.57    0.00  1.0000
  -2   0 -13   45868   79327                                                       37217    0.57    0.00  1.0000
  -2   0 -12 4678276  235861                                                     4534066    0.86    0.00  1.0000
  -2   0 -12 4408835  242013                                                     4268872    0.86    0.00  1.0000
  -2   0 -1111934041  355297                                                    12251610    1.17    0.00  1.0000
  -2   0 -1112238397  380303                                                    12559962    1.17    0.00  1.0000
  -2   0 -10 5575902  240282                                                     5310030    1.45    0.00  1.0000
  -2   0 -10 5689256  228542                                                     5420661    1.45    0.00  1.0000
  -2   0  -9 5440207  225657                                                     5135062    1.69    0.00  1.0000
  -2   0  -9 5387002  207126                                                     5083374    1.69    0.00  1.0000
  -2   0  -8 8544532  278160                                                     8983858    1.91    0.00  1.0000
  -2   0  -8 7894885  247235                                                     8317389    1.91    0.00  1.0000
  -2   0  -7 8919575  249485                                                     8421174    2.16    0.00  1.0000
  -2   0  -7 8944751  230431                                                     8445639    2.16    0.00  1.0000
  -2   0  -6  988537   93552                                                      801754    2.53    0.00  1.0000
  -2   0  -6  936884   78495                                                      755300    2.53    0.00  1.0000
  -2   0  -5 6057744  173955                                                     6663510    3.10    0.00  1.0000
  -2   0  -5 5831202  190991                                                     6425796    3.10    0.00  1.0000
  -2   0  -439991408  399154                                                    38055624    3.94    0.00  1.0000
  -2   0  -438627648  356835                                                    36725564    3.94    0.00  1.0000
  -2   0  -3  549323   46205                                                      295655    5.00    0.00  1.0000
  -2   0  -3  500961   54701                                                      260469    5.00    0.00  1.0000
  -2   0  -212317897  154796                                                    14072883    6.18    0.00  1.0000
  -2   0  -212384937  187449                                                    14144537    6.18    0.00  1.0000
  -2   0  -132937522  215330                                                    29748654    7.25    0.00  1.0000
  -2   0   223662746  156384                                                    20745148    7.91    0.00  1.0000
  -2   1 -18 2595155  238912                                                     2592011    0.03    0.00  1.0000
  -2   1 -18 2419003  248798                                                     2415968    0.03    0.00  1.0000
  -2   1 -17 4008088  297871                                                     4022068    0.09    0.00  1.0000
  -2   1 -17 3459452  270002                                                     3472441    0.09    0.00  1.0000
  -2   1 -16  232505  109612                                                      227392    0.14    0.00  1.0000
  -2   1 -16  595034  129973                                                      586837    0.14    0.00  1.0000
  -2   1 -15  781388  151231                                                      772671    0.13    0.00  1.0000
  -2   1 -15  706443  130307                                                      698156    0.13    0.00  1.0000
  -2   1 -14 4369935  259301                                                     4376488    0.04    0.00  1.0000
  -2   1 -14 4424309  274624                                                     4430903    0.04    0.00  1.0000
  -2   1 -13 3072196  212069                                                     3089284   -0.12    0.00  1.0000
  -2   1 -13 2975303  224545                                                     2992120   -0.12    0.00  1.0000
  -2   1 -12 1053437  147130                                                     1080428   -0.33    0.00  1.0000
  -2   1 -12  912712  128232                                                      937848   -0.33    0.00  1.0000
  -2   1 -1115197167  392603                                                    15033449   -0.54    0.00  1.0000
  -2   1 -1114993141  414820                                                    14830534   -0.54    0.00  1.0000
  -2   1 -10 6601892  274853                                                     6741344   -0.69    0.00  1.0000
  -2   1 -10 6856842  259583                                                     6998949   -0.69    0.00  1.0000
  -2   1  -9  117959   72080                                                      139989   -0.78    0.00  1.0000
  -2   1  -9   47558   61167                                                       61891   -0.78    0.00  1.0000
  -2   1  -8  645596   93269                                                      600307   -0.82    0.00  1.0000
  -2   1  -8  697831   88180                                                      650722   -0.82    0.00  1.0000
  -2   1  -721752984  396744                                                    22078540   -0.89    0.00  1.0000
  -2   1  -721624728  369128                                                    21949322   -0.89    0.00  1.0000
  -2   1  -6 8290255  227025                                                     8048151   -1.07    0.00  1.0000
  -2   1  -6 8033109  207473                                                     7794818   -1.07    0.00  1.0000
  -2   1  -539103300  450957                                                    38373592   -1.49    0.00  1.0000
  -2   1  -538943956  417831                                                    38215744   -1.49    0.00  1.0000
  -2   1  -458250516  471652                                                    59570632   -2.18    0.00  1.0000
  -2   1  -458366308  503220                                                    59687732   -2.18    0.00  1.0000
  -2   1  -3 5934039  129654                                                     5349841   -3.14    0.00  1.0000
  -2   1  -3 5620906  134810                                                     5052728   -3.14    0.00  1.0000
  -2   1  -2 1575724   77331                                                     2014480   -4.22    0.00  1.0000
  -2   1  -123648224  207827                                                    25679852   -5.22    0.00  1.0000
  -2   2 -18  469629  153614                                                      481556   -0.22    0.00  1.0000
  -2   2 -18  284109  125810                                                      293402   -0.22    0.00  1.0000
  -2   2 -17 2553709  244792                                                     2511056   -0.35    0.00  1.0000
  -2   2 -17 2614432  234981                                                     2571273   -0.35    0.00  1.0000
  -2   2 -16 2930861  243296                                                     2990893   -0.45    0.00  1.0000
  -2   2 -16 2814640  251080                                                     2873475   -0.45    0.00  1.0000
  -2   2 -15   30314   94346                                                       37386   -0.49    0.00  1.0000
  -2   2 -15     377  110766                                                      -60666   -0.49    0.00  1.0000
  -2   2 -14 4504175  276652                                                     4428130   -0.46    0.00  1.0000
  -2   2 -14 4417117  258598                                                     4341813   -0.46    0.00  1.0000
  -2   2 -13 4403536  251780                                                     4463700   -0.37    0.00  1.0000
  -2   2 -13 4135951  258525                                                     4194264   -0.37    0.00  1.0000
  -2   2 -12   75621   83816                                                       80883   -0.25    0.00  1.0000
  -2   2 -12   21467   92824                                                       24308   -0.25    0.00  1.0000
  -2   2 -11 3855648  225135                                                     3830800   -0.16    0.00  1.0000
  -2   2 -11 4381878  223747                                                     4355386   -0.16    0.00  1.0000
  -2   2 -10 6653010  259836                                                     6682643   -0.15    0.00  1.0000
  -2   2 -10 6668653  275047                                                     6698322   -0.15    0.00  1.0000
  -2   2  -9 3476071  184659                                                     3443719   -0.22    0.00  1.0000
  -2   2  -9 3302388  189122                                                     3270857   -0.22    0.00  1.0000
  -2   2  -8 3793888  178004                                                     3739529   -0.36    0.00  1.0000
  -2   2  -8 3930152  187601                                                     3874822   -0.36    0.00  1.0000
  -2   2  -726916810  433459                                                    27110500   -0.47    0.00  1.0000
  -2   2  -726843150  449377                                                    27036574   -0.47    0.00  1.0000
  -2   2  -621159812  374451                                                    20992378   -0.46    0.00  1.0000
  -2   2  -621126200  356439                                                    20958898   -0.46    0.00  1.0000
  -2   2  -5 7825618  210666                                                     7778489   -0.21    0.00  1.0000
  -2   2  -5 7895133  216310                                                     7847794   -0.21    0.00  1.0000
  -2   2  -434074492  401713                                                    33920620    0.34    0.00  1.0000
  -2   2  -363869920  502201                                                    64599404    1.16    0.00  1.0000
  -2   3 -18  150864  117204                                                      159980    0.29    0.00  1.0000
  -2   3 -18  212348  127756                                                      223138    0.29    0.00  1.0000
  -2   3 -17 1804763  220807                                                     1852071    0.45    0.00  1.0000
  -2   3 -17 2046966  222561                                                     2097329    0.45    0.00  1.0000
  -2   3 -16 4366435  297823                                                     4272114    0.58    0.00  1.0000
  -2   3 -16 4483265  283851                                                     4387683    0.58    0.00  1.0000
  -2   3 -15  798894  155722                                                      845783    0.66    0.00  1.0000
  -2   3 -15  906358  154443                                                      956259    0.66    0.00  1.0000
  -2   3 -14 1182808  162057                                                     1241328    0.68    0.00  1.0000
  -2   3 -14 1043372  159424                                                     1098377    0.68    0.00  1.0000
  -2   3 -13 2844251  223677                                                     2760450    0.65    0.00  1.0000
  -2   3 -13 3077127  213367                                                     2989939    0.65    0.00  1.0000
  -2   3 -12 5056477  259927                                                     5165738    0.62    0.00  1.0000
  -2   3 -12 4767050  268625                                                     4873156    0.62    0.00  1.0000
  -2   3 -11 2677799  186275                                                     2759526    0.63    0.00  1.0000
  -2   3 -11 2515283  196466                                                     2594511    0.63    0.00  1.0000
  -2   3 -10 9448765  309393                                                     9274336    0.73    0.00  1.0000
  -2   3 -10 8949313  319526                                                     8779577    0.73    0.00  1.0000
  -2   3  -9 5091464  229340                                                     5255797    0.93    0.00  1.0000
  -2   3  -9 4633808  231720                                                     4790640    0.93    0.00  1.0000
  -2   3  -8    1646   64851                                                        7158    1.19    0.00  1.0000
  -2   3  -8    2211   62603                                                      -13952    1.19    0.00  1.0000
  -2   3  -7 5255831  209238                                                     5003435    1.43    0.00  1.0000
  -2   3  -7 5094329  200912                                                     4845888    1.43    0.00  1.0000
  -2   3  -625489228  435530                                                    26101594    1.53    0.00  1.0000
  -2   3  -625386684  424079                                                    25997824    1.53    0.00  1.0000
  -2   3  -5 6187912  202405                                                     5918419    1.39    0.00  1.0000
  -2   4 -17  150068  115033                                                      139680   -0.36    0.00  1.0000
  -2   4 -17     205   96530                                                       -9825   -0.36    0.00  1.0000
  -2   4 -16 2071157  226940                                                     2125188   -0.48    0.00  1.0000
  -2   4 -16 2029824  228095                                                     2083316   -0.48    0.00  1.0000
  -2   4 -15 6291273  348062                                                     6181977   -0.56    0.00  1.0000
  -2   4 -15 6014825  322285                                                     5907966   -0.56    0.00  1.0000
  -2   4 -14   97914   99937                                                      112870   -0.58    0.00  1.0000
  -2   4 -14  100382  117326                                                      115519   -0.58    0.00  1.0000
  -2   4 -13 2992313  227063                                                     3070803   -0.58    0.00  1.0000
  -2   4 -13 2983102  233179                                                     3061471   -0.58    0.00  1.0000
  -2   4 -12 6429885  295666                                                     6314407   -0.59    0.00  1.0000
  -2   4 -12 6062376  303339                                                     5950261   -0.59    0.00  1.0000
  -2   4 -11   48331   90516                                                       42218   -0.65    0.00  1.0000
  -2   4 -11    8247   80000                                                        5601   -0.65    0.00  1.0000
  -2   4 -10 3785721  223744                                                     3910331   -0.81    0.00  1.0000
  -2   4 -10 3522612  215059                                                     3642850   -0.81    0.00  1.0000
  -2   4  -9 9037346  307997                                                     8786561   -1.08    0.00  1.0000
  -2   4  -9 8902355  313349                                                     8653464   -1.08    0.00  1.0000
  -2   4  -8 4924077  237069                                                     5170919   -1.40    0.00  1.0000
  -2   4  -8 5271200  232361                                                     5526490   -1.40    0.00  1.0000
  -2   4  -7  545586  103424                                                      645829   -1.70    0.00  1.0000
  -2   5 -17  320820  145468                                                      311870    0.20    0.00  1.0000
  -2   5 -17  319434  125142                                                      310504    0.20    0.00  1.0000
  -2   5 -16 1382898  187604                                                     1357850    0.28    0.00  1.0000
  -2   5 -16 1623936  208556                                                     1596784    0.28    0.00  1.0000
  -2   5 -15 3727083  282356                                                     3773765    0.31    0.00  1.0000
  -2   5 -15 4056300  285552                                                     4104992    0.31    0.00  1.0000
  -2   5 -14  966477  156076                                                      943359    0.30    0.00  1.0000
  -2   5 -14  937720  156659                                                      914951    0.30    0.00  1.0000
  -2   5 -13  633725  127717                                                      616772    0.28    0.00  1.0000
  -2   5 -13  675986  136491                                                      658474    0.28    0.00  1.0000
  -2   5 -12 2341370  203087                                                     2372809    0.27    0.00  1.0000
  -2   5 -12 2336900  198973                                                     2368310    0.27    0.00  1.0000
  -2   5 -11 8159597  335621                                                     8087582    0.32    0.00  1.0000
  -2   5 -11 8145068  334971                                                     8073116    0.32    0.00  1.0000
  -2   5 -10 1603813  166648                                                     1556685    0.48    0.00  1.0000
  -2   5 -10 1821039  163737                                                     1770798    0.48    0.00  1.0000
  -2   5  -9 9580206  333603                                                     9758520    0.73    0.00  1.0000
  -2   5  -9 9328764  342804                                                     9504733    0.73    0.00  1.0000
  -2   5  -8 6004362  258230                                                     5805015    1.05    0.00  1.0000
  -2   6 -16  398058  130449                                                      403369   -0.11    0.00  1.0000
  -2   6 -16  367868  139784                                                      372974   -0.11    0.00  1.0000
  -2   6 -15 1566824  198485                                                     1557367   -0.10    0.00  1.0000
  -2   6 -15 1492246  196366                                                     1483017   -0.10    0.00  1.0000
  -2   6 -14 3605234  272747                                                     3612840   -0.05    0.00  1.0000
  -2   6 -14 3679188  275631                                                     3686872   -0.05    0.00  1.0000
  -2   6 -13   11185  105043                                                       11312    0.02    0.00  1.0000
  -2   6 -13       0  108705                                                      -81184    0.02    0.00  1.0000
  -2   6 -12 3465694  243181                                                     3475365    0.07    0.00  1.0000
  -2   6 -12 3188004  242465                                                     3197280    0.07    0.00  1.0000
  -2   6 -11 7490606  342501                                                     7478043    0.06    0.00  1.0000
  -2   6 -11 6911307  336660                                                     6899240    0.06    0.00  1.0000
  -2   6 -10  307299  103292                                                      305509   -0.04    0.00  1.0000
  -2   6 -10  246392  108541                                                      244790   -0.04    0.00  1.0000
  -2   6  -9 1856999  176106                                                     1831635   -0.24    0.00  1.0000
  -2   7 -16   13571  120929                                                       13705    0.01    0.00  1.0000
  -2   7 -16  153309  120467                                                      153760    0.01    0.00  1.0000
  -2   7 -15 1640534  215703                                                     1639307   -0.01    0.00  1.0000
  -2   7 -15 1663841  203902                                                     1662605   -0.01    0.00  1.0000
  -2   7 -14 3763612  284340                                                     3775053   -0.08    0.00  1.0000
  -2   7 -14 3416079  283026                                                     3426980   -0.08    0.00  1.0000
  -2   7 -13  852401  169840                                                      840886   -0.16    0.00  1.0000
  -2   7 -13 1097176  165344                                                     1084107   -0.16    0.00  1.0000
  -2   7 -12  242472  114361                                                      233559   -0.24    0.00  1.0000
  -2   7 -12  338881  128162                                                      328329   -0.24    0.00  1.0000
  -2   7 -11 2596541  226542                                                     2629883   -0.27    0.00  1.0000
  -2   7 -11 2597941  222468                                                     2631292   -0.27    0.00  1.0000
  -2   7 -10 4962289  293087                                                     4924494   -0.22    0.00  1.0000
  -2   8 -14 1906774  225971                                                     1896850    0.09    0.00  1.0000
  -2   8 -14 1514580  207585                                                     1505737    0.09    0.00  1.0000
  -2   8 -13 2862422  258036                                                     2884882    0.17    0.00  1.0000
  -2   8 -13 2664248  258618                                                     2685918    0.17    0.00  1.0000
  -2   8 -12  288785  127283                                                      278569    0.24    0.00  1.0000
  -2   8 -12  190164  116762                                                      181891    0.24    0.00  1.0000
  -2   8 -11 2338294  227984                                                     2304852    0.28    0.00  1.0000
  -2   9 -13 1975828  237363                                                     1964884   -0.10    0.00  1.0000
  -2   9 -13 2099233  249997                                                     2087952   -0.10    0.00  1.0000
  -2   9 -12  793050  171996                                                      804471   -0.16    0.00  1.0000
  -2   9 -12  659960  156755                                                      670382   -0.16    0.00  1.0000
  -1 -11  -5   44750  116437                                                       45555   -0.05    0.00  1.0000
  -1 -11  -5  148131  135085                                                      149593   -0.05    0.00  1.0000
  -1 -11  -4  591399  151634                                                      592093   -0.01    0.00  1.0000
  -1 -11  -4  541874  154710                                                      542539   -0.01    0.00  1.0000
  -1 -11  -3 1592416  215397                                                     1593406    0.01    0.00  1.0000
  -1 -11  -3 1541350  197778                                                     1542324    0.01    0.00  1.0000
  -1 -11  -2       0  107767                                                       -5454    0.00    0.00  1.0000
  -1 -11  -2       0  125919                                                      -16467    0.00    0.00  1.0000
  -1 -11  -1  317254  129007                                                      319340   -0.05    0.00  1.0000
  -1 -11  -1  365893  125401                                                      368133   -0.05    0.00  1.0000
  -1 -11   0 3092757  265200                                                     3077044   -0.11    0.00  1.0000
  -1 -11   0 3205657  262623                                                     3189660   -0.11    0.00  1.0000
  -1 -11   1  569133  141176                                                      578617   -0.16    0.00  1.0000
  -1 -11   1  547809  148178                                                      557115   -0.16    0.00  1.0000
  -1 -11   2  155348  117492                                                      159974   -0.15    0.00  1.0000
  -1 -11   2  167585  114091                                                      172388   -0.15    0.00  1.0000
  -1 -11   3 1974128  220829                                                     1967595   -0.06    0.00  1.0000
  -1 -11   3 2129185  224744                                                     2122400   -0.06    0.00  1.0000
  -1 -11   4 1492490  201380                                                     1484055    0.09    0.00  1.0000
  -1 -11   5      97  102090                                                      -12299    0.25    0.00  1.0000
  -1 -11   6 1743926  213561                                                     1782311    0.37    0.00  1.0000
  -1 -11   7 2105499  229613                                                     2058775    0.42    0.00  1.0000
  -1 -11   8   82904  114493                                                       91529    0.38    0.00  1.0000
  -1 -10  -9 1732810  222937                                                     1743348    0.10    0.00  1.0000
  -1 -10  -9 1864787  226227                                                     1875718    0.10    0.00  1.0000
  -1 -10  -8   88098  116951                                                       85872    0.10    0.00  1.0000
  -1 -10  -8   74989  120439                                                       72937    0.10    0.00  1.0000
  -1 -10  -7  700912  155376                                                      696141    0.07    0.00  1.0000
  -1 -10  -7  504726  137308                                                      500678    0.07    0.00  1.0000
  -1 -10  -6 1251008  192592                                                     1254051    0.04    0.00  1.0000
  -1 -10  -6 1441783  191056                                                     1445050    0.04    0.00  1.0000
  -1 -10  -5  886843  162623                                                      887291   -0.01    0.00  1.0000
  -1 -10  -5 1066812  177925                                                     1067304   -0.01    0.00  1.0000
  -1 -10  -4  230811  136376                                                      231950   -0.03    0.00  1.0000
  -1 -10  -4   86036  111483                                                       86732   -0.03    0.00  1.0000
  -1 -10  -3 2889238  246822                                                     2886064   -0.02    0.00  1.0000
  -1 -10  -3 2854134  255691                                                     2850979   -0.02    0.00  1.0000
  -1 -10  -2 1343467  189329                                                     1340154    0.04    0.00  1.0000
  -1 -10  -2 1447946  176436                                                     1444506    0.04    0.00  1.0000
  -1 -10  -1  151712  101297                                                      147361    0.14    0.00  1.0000
  -1 -10  -1   39284  110341                                                       37086    0.14    0.00  1.0000
  -1 -10   0 1324681  176337                                                     1347583    0.26    0.00  1.0000
  -1 -10   0 1144438  173223                                                     1165731    0.26    0.00  1.0000
  -1 -10   1 2960404  241265                                                     2916391    0.33    0.00  1.0000
  -1 -10   1 2479136  231847                                                     2438873    0.33    0.00  1.0000
  -1 -10   2  342725  130105                                                      357217    0.31    0.00  1.0000
  -1 -10   2  222555  104902                                                      234262    0.31    0.00  1.0000
  -1 -10   3 1218514  178007                                                     1235626    0.20    0.00  1.0000
  -1 -10   3 1288813  184760                                                     1306410    0.20    0.00  1.0000
  -1 -10   4 3269907  262746                                                     3267236    0.02    0.00  1.0000
  -1 -10   5  143587  106608                                                      138884   -0.16    0.00  1.0000
  -1 -10   6  836975  156755                                                      816602   -0.29    0.00  1.0000
  -1 -10   7 1909602  221763                                                     1943963   -0.32    0.00  1.0000
  -1 -10   8 1471676  191977                                                     1446751   -0.26    0.00  1.0000
  -1 -10   9   17873  117994                                                       16248   -0.16    0.00  1.0000
  -1 -10  10 1537290  200180                                                     1541688   -0.05    0.00  1.0000
  -1 -10  11  765427  163202                                                      768010    0.04    0.00  1.0000
  -1  -9 -11 1001116  183785                                                     1005069   -0.05    0.00  1.0000
  -1  -9 -11 1101776  196116                                                     1105924   -0.05    0.00  1.0000
  -1  -9 -10  250200  121532                                                      253316   -0.08    0.00  1.0000
  -1  -9 -10  263041  132289                                                      266235   -0.08    0.00  1.0000
  -1  -9  -9 2007824  225407                                                     1998241   -0.09    0.00  1.0000
  -1  -9  -9 2408756  230387                                                     2398259   -0.09    0.00  1.0000
  -1  -9  -8 1187075  183380                                                     1192588   -0.07    0.00  1.0000
  -1  -9  -8 1167897  174235                                                     1173366   -0.07    0.00  1.0000
  -1  -9  -7       1  102653                                                      -29780   -0.02    0.00  1.0000
  -1  -9  -7   46804  106326                                                       47124   -0.02    0.00  1.0000
  -1  -9  -6 2656372  243186                                                     2661226    0.04    0.00  1.0000
  -1  -9  -6 2885731  235572                                                     2890790    0.04    0.00  1.0000
  -1  -9  -5 3400597  257923                                                     3388487    0.08    0.00  1.0000
  -1  -9  -5 3583825  258129                                                     3571393    0.08    0.00  1.0000
  -1  -9  -4      13  108991                                                      -92815    0.09    0.00  1.0000
  -1  -9  -4   12022   98744                                                       12783    0.09    0.00  1.0000
  -1  -9  -3 1082586  167609                                                     1085411    0.03    0.00  1.0000
  -1  -9  -3 1375450  173496                                                     1378633    0.03    0.00  1.0000
  -1  -9  -2 3577471  247240                                                     3591314   -0.09    0.00  1.0000
  -1  -9  -2 3561641  260663                                                     3575453   -0.09    0.00  1.0000
  -1  -9  -1  357489  116723                                                      345120   -0.27    0.00  1.0000
  -1  -9  -1  285708  107381                                                      274662   -0.27    0.00  1.0000
  -1  -9   0     310  109881                                                      -75046   -0.45    0.00  1.0000
  -1  -9   0   13380  104307                                                       14818   -0.45    0.00  1.0000
  -1  -9   1 6192069  323026                                                     6299562   -0.55    0.00  1.0000
  -1  -9   1 6439075  332183                                                     6548682   -0.55    0.00  1.0000
  -1  -9   2 1542949  179290                                                     1491641   -0.54    0.00  1.0000
  -1  -9   2 1310829  170463                                                     1263571   -0.54    0.00  1.0000
  -1  -9   3  107865  107606                                                       97709   -0.40    0.00  1.0000
  -1  -9   3  203189  105979                                                      189159   -0.40    0.00  1.0000
  -1  -9   4 2289332  215786                                                     2313380   -0.20    0.00  1.0000
  -1  -9   5 2675518  219384                                                     2674345   -0.01    0.00  1.0000
  -1  -9   6  148829  100737                                                      145316    0.12    0.00  1.0000
  -1  -9   7 2671278  226503                                                     2652909    0.14    0.00  1.0000
  -1  -9   8 2252121  220149                                                     2262253    0.09    0.00  1.0000
  -1  -9   9       0  107119                                                      -14854   -0.01    0.00  1.0000
  -1  -9  10  380070  127727                                                      385511   -0.11    0.00  1.0000
  -1  -9  11 1152286  183256                                                     1137672   -0.18    0.00  1.0000
  -1  -9  12 1013712  172087                                                     1028565   -0.19    0.00  1.0000
  -1  -9  13  388448  138638                                                      395747   -0.15    0.00  1.0000
  -1  -8 -13  117704  114077                                                      116642    0.04    0.00  1.0000
  -1  -8 -13   73309  125130                                                       72472    0.04    0.00  1.0000
  -1  -8 -12 2751342  270576                                                     2760041    0.07    0.00  1.0000
  -1  -8 -12 2629060  242865                                                     2637564    0.07    0.00  1.0000
  -1  -8 -11 2060603  223823                                                     2049156    0.10    0.00  1.0000
  -1  -8 -11 1903292  219372                                                     1892291    0.10    0.00  1.0000
  -1  -8 -10  277633  110698                                                      282823    0.12    0.00  1.0000
  -1  -8 -10  512791  147692                                                      519835    0.12    0.00  1.0000
  -1  -8  -9 1320519  173724                                                     1330643    0.11    0.00  1.0000
  -1  -8  -9 1384093  184668                                                     1394457    0.11    0.00  1.0000
  -1  -8  -8 4439797  283713                                                     4429327    0.06    0.00  1.0000
  -1  -8  -8 4546751  293022                                                     4536156    0.06    0.00  1.0000
  -1  -8  -7  196801  110942                                                      196332   -0.01    0.00  1.0000
  -1  -8  -7  205535  107541                                                      205056   -0.01    0.00  1.0000
  -1  -8  -6 2400199  214003                                                     2388609   -0.10    0.00  1.0000
  -1  -8  -6 2172252  201137                                                     2161226   -0.10    0.00  1.0000
  -1  -8  -5 5288436  289565                                                     5314847   -0.15    0.00  1.0000
  -1  -8  -5 5026238  280912                                                     5051986   -0.15    0.00  1.0000
  -1  -8  -4 3033440  218584                                                     3015389   -0.13    0.00  1.0000
  -1  -8  -4 2854432  218552                                                     2836921   -0.13    0.00  1.0000
  -1  -8  -3   32163   98048                                                       32502   -0.03    0.00  1.0000
  -1  -8  -3   70543   93414                                                       71044   -0.03    0.00  1.0000
  -1  -8  -2 8713688  358518                                                     8675309    0.17    0.00  1.0000
  -1  -8  -2 7973444  338117                                                     7936732    0.17    0.00  1.0000
  -1  -8  -1 5435296  291757                                                     5510084    0.41    0.00  1.0000
  -1  -8  -1 5585396  282682                                                     5661208    0.41    0.00  1.0000
  -1  -8   0   84243  110301                                                       99239    0.63    0.00  1.0000
  -1  -8   0  202287   93414                                                      225188    0.63    0.00  1.0000
  -1  -8   1 2207156  190123                                                     2121734    0.75    0.00  1.0000
  -1  -8   1 2482325  196163                                                     2391684    0.75    0.00  1.0000
  -1  -8   2 7232554  321967                                                     7385727    0.72    0.00  1.0000
  -1  -8   2 6838172  320608                                                     6987133    0.72    0.00  1.0000
  -1  -8   3 1183150  144332                                                     1135305    0.57    0.00  1.0000
  -1  -8   3 1043337  141407                                                      998437    0.57    0.00  1.0000
  -1  -8   4 1839844  185933                                                     1804610    0.34    0.00  1.0000
  -1  -8   5 5237764  280484                                                     5258630    0.12    0.00  1.0000
  -1  -8   6 1107849  154220                                                     1109825   -0.02    0.00  1.0000
  -1  -8   7  586268  131613                                                      589932   -0.06    0.00  1.0000
  -1  -8   8 2334712  208157                                                     2333407   -0.01    0.00  1.0000
  -1  -8   9 3252088  242248                                                     3240211    0.08    0.00  1.0000
  -1  -8  10      50  101453                                                      -28118    0.18    0.00  1.0000
  -1  -8  11 2661916  232285                                                     2692145    0.24    0.00  1.0000
  -1  -8  12 2627258  238556                                                     2596859    0.24    0.00  1.0000
  -1  -8  13   26197  103301                                                       24274    0.19    0.00  1.0000
  -1  -8  14  757423  173230                                                      764736    0.11    0.00  1.0000
  -1  -8  15 1657886  219866                                                     1655758    0.02    0.00  1.0000
  -1  -7 -14 4055440  315126                                                     4069075   -0.09    0.00  1.0000
  -1  -7 -14 3807393  292356                                                     3820605   -0.09    0.00  1.0000
  -1  -7 -13  960815  173441                                                      952456   -0.11    0.00  1.0000
  -1  -7 -13  631522  146375                                                      624750   -0.11    0.00  1.0000
  -1  -7 -12  994719  175562                                                      982719   -0.15    0.00  1.0000
  -1  -7 -12 1015718  166229                                                     1003591   -0.15    0.00  1.0000
  -1  -7 -11 4095844  292721                                                     4128140   -0.20    0.00  1.0000
  -1  -7 -11 4240435  281062                                                     4273295   -0.20    0.00  1.0000
  -1  -7 -10 1399160  174967                                                     1378171   -0.23    0.00  1.0000
  -1  -7 -10 1090771  157002                                                     1072248   -0.23    0.00  1.0000
  -1  -7  -9  555127  130242                                                      542967   -0.21    0.00  1.0000
  -1  -7  -9  723607  132979                                                      709714   -0.21    0.00  1.0000
  -1  -7  -8 4163860  262404                                                     4186250   -0.14    0.00  1.0000
  -1  -7  -8 4162938  252096                                                     4185326   -0.14    0.00  1.0000
  -1  -7  -7 3030218  227751                                                     3024644   -0.04    0.00  1.0000
  -1  -7  -7 2777920  212849                                                     2772584   -0.04    0.00  1.0000
  -1  -7  -6    7794   98406                                                        8175    0.05    0.00  1.0000
  -1  -7  -6    9241   88410                                                        9656    0.05    0.00  1.0000
  -1  -7  -5 7614181  325321                                                     7592280    0.10    0.00  1.0000
  -1  -7  -5 8016786  321069                                                     7994312    0.10    0.00  1.0000
  -1  -7  -4 8468994  334778                                                     8482571    0.06    0.00  1.0000
  -1  -7  -4 8811599  332023                                                     8825448    0.06    0.00  1.0000
  -1  -7  -3  755035  119597                                                      761406   -0.09    0.00  1.0000
  -1  -7  -3  859715  132415                                                      866513   -0.09    0.00  1.0000
  -1  -7  -2 4262201  239250                                                     4317757   -0.34    0.00  1.0000
  -1  -7  -2 4009460  231574                                                     4063349   -0.34    0.00  1.0000
  -1  -7  -111556280  373008                                                    11388541   -0.63    0.00  1.0000
  -1  -7  -111761750  369066                                                    11592518   -0.63    0.00  1.0000
  -1  -7   0  578515  120046                                                      630283   -0.87    0.00  1.0000
  -1  -7   0  417101  100150                                                      461213   -0.87    0.00  1.0000
  -1  -7   1  738539  120198                                                      805612   -0.98    0.00  1.0000
  -1  -7   1  658926  123500                                                      722359   -0.98    0.00  1.0000
  -1  -7   2 9545970  338756                                                     9325387   -0.92    0.00  1.0000
  -1  -7   2 9025600  332098                                                     8811147   -0.92    0.00  1.0000
  -1  -7   3 4626637  252086                                                     4745073   -0.70    0.00  1.0000
  -1  -7   3 4896956  254897                                                     5018780   -0.70    0.00  1.0000
  -1  -7   4     252   90622                                                      -45110   -0.40    0.00  1.0000
  -1  -7   5 3911020  227390                                                     3892440   -0.12    0.00  1.0000
  -1  -7   6 5548661  271767                                                     5535716    0.07    0.00  1.0000
  -1  -7   7  149461   92792                                                      153801    0.14    0.00  1.0000
  -1  -7   8 5128376  276995                                                     5147878    0.11    0.00  1.0000
  -1  -7   9 7604361  336355                                                     7601656    0.01    0.00  1.0000
  -1  -7  10 1339703  170457                                                     1330549   -0.10    0.00  1.0000
  -1  -7  11  669087  143262                                                      657356   -0.19    0.00  1.0000
  -1  -7  12 2816056  240364                                                     2845329   -0.22    0.00  1.0000
  -1  -7  13 1840304  203623                                                     1819092   -0.20    0.00  1.0000
  -1  -7  14   63675  110013                                                       61109   -0.13    0.00  1.0000
  -1  -7  15 1800939  217821                                                     1806897   -0.06    0.00  1.0000
  -1  -6 -15      17  129568                                                      -52972    0.10    0.00  1.0000
  -1  -6 -15   39759  106709                                                       38218    0.10    0.00  1.0000
  -1  -6 -14 3375257  268634                                                     3355357    0.14    0.00  1.0000
  -1  -6 -14 3380134  265609                                                     3360219    0.14    0.00  1.0000
  -1  -6 -13 3332631  251040                                                     3362310    0.21    0.00  1.0000
  -1  -6 -13 3347335  266654                                                     3377080    0.21    0.00  1.0000
  -1  -6 -12     141   97035                                                      -44088    0.30    0.00  1.0000
  -1  -6 -12     141  111486                                                      -83573    0.30    0.00  1.0000
  -1  -6 -11 3742307  253263                                                     3683630    0.39    0.00  1.0000
  -1  -6 -11 3530747  250038                                                     3473759    0.39    0.00  1.0000
  -1  -6 -10 3788866  260881                                                     3856401    0.44    0.00  1.0000
  -1  -6 -10 4249042  256594                                                     4320544    0.44    0.00  1.0000
  -1  -6  -9  183000   92134                                                      168678    0.44    0.00  1.0000
  -1  -6  -9  318164  116838                                                      299189    0.44    0.00  1.0000
  -1  -6  -8 1962286  174929                                                     1922073    0.37    0.00  1.0000
  -1  -6  -8 2029276  186655                                                     1988379    0.37    0.00  1.0000
  -1  -6  -713855761  400615                                                    13936150    0.27    0.00  1.0000
  -1  -6  -713943629  418914                                                    14024270    0.27    0.00  1.0000
  -1  -6  -6 1082473  134369                                                     1067149    0.19    0.00  1.0000
  -1  -6  -6 1432159  142055                                                     1414525    0.19    0.00  1.0000
  -1  -6  -5 1128288  134477                                                     1114316    0.17    0.00  1.0000
  -1  -6  -5 1218668  132186                                                     1204145    0.17    0.00  1.0000
  -1  -6  -412065521  360208                                                    12135918    0.26    0.00  1.0000
  -1  -6  -411827142  347938                                                    11896842    0.26    0.00  1.0000
  -1  -6  -3 9908392  323405                                                     9791665    0.47    0.00  1.0000
  -1  -6  -310275066  324226                                                    10156190    0.47    0.00  1.0000
  -1  -6  -2  691444  108401                                                      640859    0.79    0.00  1.0000
  -1  -6  -2  703701  102596                                                      652661    0.79    0.00  1.0000
  -1  -6  -117015444  416928                                                    17382884    1.13    0.00  1.0000
  -1  -6  -116713305  408712                                                    17077486    1.13    0.00  1.0000
  -1  -6   0 3432981  191121                                                     3236909    1.39    0.00  1.0000
  -1  -6   0 3623466  191544                                                     3421951    1.39    0.00  1.0000
  -1  -6   1  730588  110608                                                      634590    1.47    0.00  1.0000
  -1  -6   1  852197  107912                                                      748247    1.47    0.00  1.0000
  -1  -6   2 1308404  134812                                                     1427277    1.34    0.00  1.0000
  -1  -6   2  931975  123301                                                     1032670    1.34    0.00  1.0000
  -1  -6   3 4209224  215044                                                     4048276    1.02    0.00  1.0000
  -1  -6   3 4691897  220436                                                     4521886    1.02    0.00  1.0000
  -1  -6   4 2014190  159762                                                     2082150    0.60    0.00  1.0000
  -1  -6   5 2958119  185548                                                     2985424    0.20    0.00  1.0000
  -1  -6   616466053  419557                                                    16496682   -0.10    0.00  1.0000
  -1  -6   7  909076  125155                                                      890924   -0.25    0.00  1.0000
  -1  -6   8 1591305  152248                                                     1565653   -0.26    0.00  1.0000
  -1  -6   9 5265920  269560                                                     5296305   -0.17    0.00  1.0000
  -1  -6  10 5699200  286639                                                     5693202   -0.03    0.00  1.0000
  -1  -6  11  104663  101426                                                      102144    0.10    0.00  1.0000
  -1  -6  12  979165  151470                                                      965583    0.18    0.00  1.0000
  -1  -6  13 3082738  239496                                                     3110492    0.20    0.00  1.0000
  -1  -6  14  123060  111925                                                      118439    0.17    0.00  1.0000
  -1  -5 -16 1492659  200394                                                     1480540   -0.13    0.00  1.0000
  -1  -5 -16 1431256  191653                                                     1419389   -0.13    0.00  1.0000
  -1  -5 -15      60  130653                                                     -113162   -0.20    0.00  1.0000
  -1  -5 -15      60  103084                                                      -65638   -0.20    0.00  1.0000
  -1  -5 -14 1141041  174061                                                     1165792   -0.30    0.00  1.0000
  -1  -5 -14 1551778  205462                                                     1580620   -0.30    0.00  1.0000
  -1  -5 -13 2582849  213831                                                     2528644   -0.44    0.00  1.0000
  -1  -5 -13 2518726  224348                                                     2465201   -0.44    0.00  1.0000
  -1  -5 -12  360103  114472                                                      388544   -0.60    0.00  1.0000
  -1  -5 -12  248310  110043                                                      272014   -0.60    0.00  1.0000
  -1  -5 -11 2823265  221714                                                     2923648   -0.75    0.00  1.0000
  -1  -5 -11 2623657  206511                                                     2720458   -0.75    0.00  1.0000
  -1  -5 -10 8207591  333954                                                     8017323   -0.85    0.00  1.0000
  -1  -5 -10 8184124  342322                                                     7994130   -0.85    0.00  1.0000
  -1  -5  -9 2492193  192486                                                     2601646   -0.88    0.00  1.0000
  -1  -5  -9 2585322  199950                                                     2696780   -0.88    0.00  1.0000
  -1  -5  -8  682180  120435                                                      737683   -0.84    0.00  1.0000
  -1  -5  -8  676908  112925                                                      732201   -0.84    0.00  1.0000
  -1  -5  -7 4036393  211287                                                     3917375   -0.77    0.00  1.0000
  -1  -5  -7 3881724  217939                                                     3765025   -0.77    0.00  1.0000
  -1  -5  -6 2172880  165676                                                     2255724   -0.73    0.00  1.0000
  -1  -5  -6 2154296  157795                                                     2236788   -0.73    0.00  1.0000
  -1  -5  -5 1458881  128656                                                     1386721   -0.77    0.00  1.0000
  -1  -5  -5 1657165  137829                                                     1580196   -0.77    0.00  1.0000
  -1  -5  -4 5873757  233930                                                     5697535   -0.94    0.00  1.0000
  -1  -5  -4 6285573  231211                                                     6103233   -0.94    0.00  1.0000
  -1  -5  -321735112  426307                                                    22197610   -1.26    0.00  1.0000
  -1  -5  -321669454  435451                                                    22131258   -1.26    0.00  1.0000
  -1  -5  -2  599636   92707                                                      502996   -1.68    0.00  1.0000
  -1  -5  -2  434020   83030                                                      352414   -1.68    0.00  1.0000
  -1  -5  -1 5455213  211390                                                     5076815   -2.11    0.00  1.0000
  -1  -5  -1 5467430  207276                                                     5088601   -2.11    0.00  1.0000
  -1  -5   0 6524512  247553                                                     7012249   -2.41    0.00  1.0000
  -1  -5   0 6601803  242612                                                     7092371   -2.41    0.00  1.0000
  -1  -5   1 5670237  215061                                                     5215335   -2.49    0.00  1.0000
  -1  -5   1 5477319  214930                                                     5030384   -2.49    0.00  1.0000
  -1  -5   2 6371752  233048                                                     5926751   -2.28    0.00  1.0000
  -1  -5   2 6258533  230749                                                     5817574   -2.28    0.00  1.0000
  -1  -5   310907638  314615                                                    11384920   -1.83    0.00  1.0000
  -1  -5   311625838  322579                                                    12118422   -1.83    0.00  1.0000
  -1  -5   4 1769040  135370                                                     1644548   -1.24    0.00  1.0000
  -1  -5   5  374171   83625                                                      343046   -0.66    0.00  1.0000
  -1  -5   6 7647469  272267                                                     7689928   -0.20    0.00  1.0000
  -1  -5   7 9977092  313032                                                     9999067    0.09    0.00  1.0000
  -1  -5   8  674292  108462                                                      662128    0.19    0.00  1.0000
  -1  -5   9 9086322  328649                                                     9052240    0.14    0.00  1.0000
  -1  -5  10 4480968  245660                                                     4483590    0.02    0.00  1.0000
  -1  -5  11      25   98853                                                      -61037   -0.13    0.00  1.0000
  -1  -5  12  110147   98557                                                      115873   -0.23    0.00  1.0000
  -1  -5  13 2158265  208763                                                     2128475   -0.27    0.00  1.0000
  -1  -4 -17  831298  170954                                                      819035    0.17    0.00  1.0000
  -1  -4 -17  914281  171196                                                      901419    0.17    0.00  1.0000
  -1  -4 -16 3184635  260416                                                     3223563    0.28    0.00  1.0000
  -1  -4 -16 2847642  259475                                                     2884458    0.28    0.00  1.0000
  -1  -4 -15  319667  123353                                                      302092    0.42    0.00  1.0000
  -1  -4 -15  344825  115737                                                      326563    0.42    0.00  1.0000
  -1  -4 -14  370843  121554                                                      342668    0.60    0.00  1.0000
  -1  -4 -14  511929  127850                                                      478729    0.60    0.00  1.0000
  -1  -4 -13 7877239  355561                                                     8061224    0.83    0.00  1.0000
  -1  -4 -13 8564211  374226                                                     8756006    0.83    0.00  1.0000
  -1  -4 -12 2396321  193771                                                     2269237    1.08    0.00  1.0000
  -1  -4 -12 1913606  186958                                                     1800217    1.08    0.00  1.0000
  -1  -4 -11  415710  111842                                                      352051    1.30    0.00  1.0000
  -1  -4 -11  636974  114533                                                      557545    1.30    0.00  1.0000
  -1  -4 -10 4277767  252208                                                     4516978    1.46    0.00  1.0000
  -1  -4 -10 4164893  231985                                                     4400969    1.46    0.00  1.0000
  -1  -4  -911070286  348295                                                    10671217    1.55    0.00  1.0000
  -1  -4  -910662693  327245                                                    10271107    1.55    0.00  1.0000
  -1  -4  -8  935894  122476                                                     1058223    1.56    0.00  1.0000
  -1  -4  -8 1042490  119532                                                     1171394    1.56    0.00  1.0000
  -1  -4  -7 5199228  225622                                                     5482438    1.56    0.00  1.0000
  -1  -4  -7 5262756  237475                                                     5547668    1.56    0.00  1.0000
  -1  -4  -613214761  320764                                                    12760351    1.61    0.00  1.0000
  -1  -4  -613101677  334357                                                    12649233    1.61    0.00  1.0000
  -1  -4  -5   95359   63879                                                       99659    1.77    0.00  1.0000
  -1  -4  -5   26268   58496                                                       26076    1.77    0.00  1.0000
  -1  -4  -4 3092797  161131                                                     3389199    2.10    0.00  1.0000
  -1  -4  -4 3252488  173732                                                     3556275    2.10    0.00  1.0000
  -1  -4  -316544263  331706                                                    15728944    2.59    0.00  1.0000
  -1  -4  -316619300  319569                                                    15802112    2.59    0.00  1.0000
  -1  -4  -218346032  360343                                                    19436448    3.19    0.00  1.0000
  -1  -4  -219190796  357070                                                    20305684    3.19    0.00  1.0000
  -1  -4  -1  186530   61876                                                       81065    3.77    0.00  1.0000
  -1  -4  -1  314601   67494                                                      171326    3.77    0.00  1.0000
  -1  -4   014503415  298215                                                    13286814    4.17    0.00  1.0000
  -1  -4   014266194  289152                                                    13059795    4.17    0.00  1.0000
  -1  -4   118162752  355267                                                    19611568    4.25    0.00  1.0000
  -1  -4   118424322  365276                                                    19883336    4.25    0.00  1.0000
  -1  -4   2  376556   70953                                                      210346    3.95    0.00  1.0000
  -1  -4   2  432626   67373                                                      252769    3.95    0.00  1.0000
  -1  -4   3 7183490  215901                                                     6500464    3.34    0.00  1.0000
  -1  -4   428108710  445469                                                    29177698    2.54    0.00  1.0000
  -1  -4   5 6174708  216921                                                     5841509    1.73    0.00  1.0000
  -1  -4   6 1104354  108139                                                     1021256    1.05    0.00  1.0000
  -1  -4   725988760  464880                                                    26222026    0.58    0.00  1.0000
  -1  -4   8 3133874  177578                                                     3086785    0.34    0.00  1.0000
  -1  -4   9  854231  121327                                                      833330    0.29    0.00  1.0000
  -1  -4  1011588779  364808                                                    11682578    0.35    0.00  1.0000
  -1  -4  11 6873124  298986                                                     6782685    0.44    0.00  1.0000
  -1  -4  12  165891  104994                                                      150199    0.50    0.00  1.0000
  -1  -3 -17   52701  100666                                                       47366   -0.30    0.00  1.0000
[truncated: 1,087,189 more chars]
